# Supplementary material
Source: publisher figshare collection journal article supplement (https://diabetesjournals.figshare.com/ndownloader/files/29148495)
Supplement: Supplementary file 1 [file 29148495]

## Sheet: empai_4x Ins1_WT_beta3KOt
Bio View:Identified Proteins (1861/1939)<BR>Including 0 Decoys	Accession Number	Alternate ID	WT1 (emapi)	WT2 (emapi)	WT3 (emapi)	WT4 (emapi)	beta3KO_1 (empai)	beta3KO_2 (empai)	beta3KO_3 (empai)	beta3KO_4 (empai)
Heat shock protein HSP 90-alpha OS=Rattus norvegicus OX=10116 GN=Hsp90aa1 PE=1 SV=3	HS90A_RAT	Hsp90aa1	8.27	10.6	9.78	6.97	5.6	6.12	6.97	5.36
Acetyl-CoA carboxylase 1 OS=Rattus norvegicus OX=10116 GN=Acaca PE=1 SV=1	ACACA_RAT	Acaca	2.46	2.42	2.46	2.42	1.81	1.31	1.37	1.07
Microtubule-associated protein 1B OS=Rattus norvegicus OX=10116 GN=Map1b PE=1 SV=2	MAP1B_RAT	Map1b	1.87	1.7	1.97	1.61	1.48	1.45	1.31	1.28
Eukaryotic translation initiation factor 3 subunit A OS=Rattus norvegicus OX=10116 GN=Eif3a PE=2 SV=2	EIF3A_RAT	Eif3a	1.43	1.48	1.34	1.53	1.12	0.918	0.574	0.513
Myb-binding protein 1A OS=Rattus norvegicus OX=10116 GN=Mybbp1a PE=1 SV=2	MBB1A_RAT	Mybbp1a	1.33	1.64	1.38	1.59	1.14	0.807	1.05	0.925
Heterogeneous nuclear ribonucleoproteins A2/B1 OS=Rattus norvegicus OX=10116 GN=Hnrnpa2b1 PE=1 SV=1	ROA2_RAT	Hnrnpa2b1	23.8	18.2	23.8	19.9	11.6	18.2	16.7	11.6
Plasma membrane calcium-transporting ATPase 1 OS=Rattus norvegicus OX=10116 GN=Atp2b1 PE=1 SV=2	AT2B1_RAT	Atp2b1	0.483	0.554	0.627	0.665	0.449	0.483	0.383	0.416
Vigilin OS=Rattus norvegicus OX=10116 GN=Hdlbp PE=1 SV=1	VIGLN_RAT	Hdlbp	1.27	1.43	0.847	1.27	0.686	0.505	0.648	0.575
Structural maintenance of chromosomes protein 1A OS=Rattus norvegicus OX=10116 GN=Smc1a PE=1 SV=1	SMC1A_RAT	Smc1a	1.1	0.876	0.498	0.639	0.465	0.28	0.433	0.433
Far upstream element-binding protein 2 OS=Rattus norvegicus OX=10116 GN=Khsrp PE=1 SV=1	FUBP2_RAT	Khsrp	1.94	2.2	2.97	2.64	1.7	1.94	1.58	1.58
Creatine kinase B-type OS=Rattus norvegicus OX=10116 GN=Ckb PE=1 SV=2	KCRB_RAT	Ckb	8.24	6.97	8.24	8.24	1.82	2.04	6.4	4.93
Sister chromatid cohesion protein PDS5 homolog B OS=Rattus norvegicus OX=10116 GN=Pds5b PE=1 SV=2	PDS5B_RAT	Pds5b	0.508	0.508	0.395	0.631	0.479	0.216	0.17	0.216
DNA (cytosine-5)-methyltransferase 1 OS=Rattus norvegicus OX=10116 GN=Dnmt1 PE=1 SV=2	DNMT1_RAT	Dnmt1	0.373	0.5	0.474	0.474	0.422	0.303	0.326	0.303
DNA topoisomerase 2-alpha OS=Rattus norvegicus OX=10116 GN=Top2a PE=1 SV=1	TOP2A_RAT	Top2a	0.16	0.346	0.346	0.424	0.139	0.139	0.0772	0.0772
Glycerol-3-phosphate dehydrogenase [NAD(+)], cytoplasmic OS=Rattus norvegicus OX=10116 GN=Gpd1 PE=1 SV=4	GPDA_RAT	Gpd1	9.64	7.26	4.41	7.26	2.55	2.26	4.41	4.41
Chromodomain-helicase-DNA-binding protein 5 OS=Rattus norvegicus OX=10116 GN=Chd5 PE=1 SV=1	CHD5_RAT	Chd5	0.208	0.208	0.243	0.208	0.139	0.173	0.19	0.139
MICOS complex subunit Mic60 (Fragment) OS=Rattus norvegicus OX=10116 GN=Immt PE=1 SV=1	MIC60_RAT	Immt	1.59	2.44	2.13	1.59	1.04	1.04	1.04	0.687
Synaptojanin-1 OS=Rattus norvegicus OX=10116 GN=Synj1 PE=1 SV=3	SYNJ1_RAT	Synj1	0.372	0.322	0.372	0.347	0.25	0.205	0.205	0.182
Rho-associated protein kinase 1 OS=Rattus norvegicus OX=10116 GN=Rock1 PE=1 SV=1	ROCK1_RAT	Rock1	0.3	0.381	0.274	0.274	0.199	0.175	0.0412	0
ATP-dependent 6-phosphofructokinase, muscle type OS=Rattus norvegicus OX=10116 GN=Pfkm PE=1 SV=3	PFKAM_RAT	Pfkm	0.754	0.821	0.821	0.821	0.754	0.689	0.627	0.627
Ral GTPase-activating protein subunit alpha-2 OS=Rattus norvegicus OX=10116 GN=Ralgapa2 PE=1 SV=1	RGPA2_RAT	Ralgapa2	0.298	0.338	0.38	0.401	0.298	0.239	0.298	0.22
Signal transducer and activator of transcription 3 OS=Rattus norvegicus OX=10116 GN=Stat3 PE=1 SV=1	STAT3_RAT	Stat3	0.726	0.79	0.664	0.726	0.387	0.547	0.387	0.29
Homeobox protein cut-like 1 OS=Rattus norvegicus OX=10116 GN=Cux1 PE=1 SV=2	CUX1_RAT	Cux1	0.368	0.265	0.265	0.265	0.265	0.216	0.147	0.147
Nuclease-sensitive element-binding protein 1 OS=Rattus norvegicus OX=10116 GN=Ybx1 PE=2 SV=3	YBOX1_RAT	Ybx1	3.49	5.38	4.85	4.35	3.11	2.76	2.76	3.49
Rho-associated protein kinase 2 OS=Rattus norvegicus OX=10116 GN=Rock2 PE=1 SV=2	ROCK2_RAT	Rock2	0.106	0.106	0.0836	0.106	0	0	0	0
General transcription factor 3C polypeptide 1 OS=Rattus norvegicus OX=10116 GN=Gtf3c1 PE=1 SV=1	TF3C1_RAT	Gtf3c1	0.0976	0.0976	0.142	0.112	0.0831	0.0407	0.0976	0.0547
Protein PRRC2A OS=Rattus norvegicus OX=10116 GN=Prrc2a PE=1 SV=1	PRC2A_RAT	Prrc2a	0.218	0.218	0.151	0.218	0.184	0.135	0.119	0.119
Calcium-dependent secretion activator 1 OS=Rattus norvegicus OX=10116 GN=Cadps PE=1 SV=1	CAPS1_RAT	Cadps	0.391	0.274	0.219	0.302	0.246	0.192	0.166	0.141
Reticulon-4 OS=Rattus norvegicus OX=10116 GN=Rtn4 PE=1 SV=1	RTN4_RAT	Rtn4	0.392	0.428	0.428	0.502	0.323	0.323	0.29	0.226
Cold shock domain-containing protein E1 OS=Rattus norvegicus OX=10116 GN=Csde1 PE=2 SV=1	CSDE1_RAT	Csde1	0.334	0.334	0.487	0.287	0.242	0.242	0.242	0.242
Catenin beta-1 OS=Rattus norvegicus OX=10116 GN=Ctnnb1 PE=1 SV=1	CTNB1_RAT	Ctnnb1	0.628	0.691	0.892	0.822	0.35	0.206	0.252	0.3
Lupus La protein homolog OS=Rattus norvegicus OX=10116 GN=Ssb PE=1 SV=1	LA_RAT	Ssb	0.945	1.22	1.08	1.08	0.945	0.703	0.703	0.82
Tricarboxylate transport protein, mitochondrial OS=Rattus norvegicus OX=10116 GN=Slc25a1 PE=1 SV=1	TXTP_RAT	Slc25a1	1.78	2.68	2.06	3.04	1.78	1.31	1.54	1.78
26S proteasome non-ATPase regulatory subunit 13 OS=Rattus norvegicus OX=10116 GN=Psmd13 PE=1 SV=1	PSD13_RAT	Psmd13	1.62	1.62	1.26	1.43	0.949	1.43	1.1	1.1
SH3 and multiple ankyrin repeat domains protein 2 OS=Rattus norvegicus OX=10116 GN=Shank2 PE=1 SV=2	SHAN2_RAT	Shank2	0.176	0.225	0.153	0.2	0.107	0.153	0	0.0414
C-Jun-amino-terminal kinase-interacting protein 3 OS=Rattus norvegicus OX=10116 GN=Mapk8ip3 PE=1 SV=2	JIP3_RAT	Mapk8ip3	0.193	0.142	0.247	0.142	0.142	0.117	0.0685	0.0685
Glutamine--tRNA ligase OS=Rattus norvegicus OX=10116 GN=Qars PE=1 SV=1	SYQ_RAT	Qars	0.389	0.389	0.441	0.339	0.2	0.157	0.2	0.157
PDZ and LIM domain protein 1 OS=Rattus norvegicus OX=10116 GN=Pdlim1 PE=1 SV=4	PDLI1_RAT	Pdlim1	1.66	1.43	2.17	2.47	0.305	1.04	0.704	0.862
Cullin-3 OS=Rattus norvegicus OX=10116 GN=Cul3 PE=1 SV=2	CUL3_RAT	Cul3	0.241	0.241	0.197	0.197	0.114	0.0747	0.0747	0.114
Calponin-3 OS=Rattus norvegicus OX=10116 GN=Cnn3 PE=1 SV=1	CNN3_RAT	Cnn3	1.18	1.83	1	1.38	0.415	0.682	0.835	1
Dynamin-like 120 kDa protein, mitochondrial OS=Rattus norvegicus OX=10116 GN=Opa1 PE=1 SV=1	OPA1_RAT	Opa1	0.26	0.26	0.374	0.297	0.189	0.224	0.155	0.0904
Annexin A4 OS=Rattus norvegicus OX=10116 GN=Anxa4 PE=1 SV=3	ANXA4_RAT	Anxa4	1.88	1.41	1.02	1.41	0.192	0.696	1.21	0.852
Plasma membrane calcium-transporting ATPase 2 OS=Rattus norvegicus OX=10116 GN=Atp2b2 PE=1 SV=2	AT2B2_RAT	Atp2b2	0.39	0.491	0.357	0.491	0.39	0.295	0.265	0.265
Coatomer subunit gamma-2 OS=Rattus norvegicus OX=10116 GN=Copg2 PE=3 SV=2	COPG2_RAT	Copg2	0.549	0.611	0.488	0.488	0.269	0.321	0.43	0.321
Leucyl-cystinyl aminopeptidase OS=Rattus norvegicus OX=10116 GN=Lnpep PE=1 SV=1	LCAP_RAT	Lnpep	0.352	0.352	0.147	0.315	0.116	0.147	0.179	0.147
Sodium/calcium exchanger 2 OS=Rattus norvegicus OX=10116 GN=Slc8a2 PE=1 SV=1	NAC2_RAT	Slc8a2	0.421	0.333	0.421	0.376	0.25	0.25	0.173	0.173
Proteasome subunit alpha type-1 OS=Rattus norvegicus OX=10116 GN=Psma1 PE=1 SV=2	PSA1_RAT	Psma1	2.58	2.22	1.6	1.9	1.6	1.1	1.6	1.34
ATPase family AAA domain-containing protein 1 OS=Rattus norvegicus OX=10116 GN=Atad1 PE=1 SV=1	ATAD1_RAT	Atad1	0.723	1.01	1.01	1.17	0.723	0.862	0.594	0.475
Nuclear pore complex protein Nup153 OS=Rattus norvegicus OX=10116 GN=Nup153 PE=1 SV=1	NU153_RAT	Nup153	0.135	0.159	0.234	0.261	0.111	0.0879	0.0652	0
Acidic leucine-rich nuclear phosphoprotein 32 family member A OS=Rattus norvegicus OX=10116 GN=Anp32a PE=2 SV=1	AN32A_RAT	Anp32a	0.934	0.934	0.733	0.934	0.733	0.733	0.552	0.391
Protein SCAF8 OS=Rattus norvegicus OX=10116 GN=Scaf8 PE=1 SV=1	SCAF8_RAT	Scaf8	0.0716	0.0716	0.0716	0.0966	0.0472	0	0	0
Beta-synuclein OS=Rattus norvegicus OX=10116 GN=Sncb PE=1 SV=1	SYUB_RAT	Sncb	7.12	7.12	9.01	4.34	3.33	4.34	3.33	4.34
Ribosomal protein S6 kinase alpha-1 OS=Rattus norvegicus OX=10116 GN=Rps6ka1 PE=1 SV=1	KS6A1_RAT	Rps6ka1	0.213	0.261	0.261	0.123	0.167	0.123	0.0804	0
Oxysterol-binding protein-related protein 1 OS=Rattus norvegicus OX=10116 GN=Osbpl1a PE=1 SV=1	OSBL1_RAT	Osbpl1a	0.0614	0.0614	0	0.0935	0	0	0	0
Nucleosome assembly protein 1-like 4 OS=Rattus norvegicus OX=10116 GN=Nap1l4 PE=1 SV=1	NP1L4_RAT	Nap1l4	0.917	0.917	1.06	1.06	0.783	0.783	0.783	0.783
Cyclin-dependent kinase 1 OS=Rattus norvegicus OX=10116 GN=Cdk1 PE=1 SV=1	CDK1_RAT	Cdk1	2.03	2.65	0.588	1.52	0	0.448	0.588	0.588
Malectin OS=Rattus norvegicus OX=10116 GN=Mlec PE=2 SV=1	MLEC_RAT	Mlec	1.4	0.791	0.791	0.973	0.625	0.625	0.475	0.475
Phosphoserine phosphatase OS=Rattus norvegicus OX=10116 GN=Psph PE=2 SV=1	SERB_RAT	Psph	1.4	1.4	1.4	1.72	0.868	1.12	0.284	0.649
Aromatic-L-amino-acid decarboxylase OS=Rattus norvegicus OX=10116 GN=Ddc PE=1 SV=1	DDC_RAT	Ddc	1.15	1.03	0.911	1.15	0.424	0.424	0.265	0.193
Fanconi anemia group D2 protein homolog OS=Rattus norvegicus OX=10116 GN=Fancd2 PE=2 SV=2	FACD2_RAT	Fancd2	0.103	0.0608	0.0401	0.0608	0	0	0	0
Peroxisomal acyl-coenzyme A oxidase 1 OS=Rattus norvegicus OX=10116 GN=Acox1 PE=1 SV=1	ACOX1_RAT	Acox1	0.187	0.293	0.293	0.293	0.137	0.137	0	0.187
High mobility group nucleosome-binding domain-containing protein 5 OS=Rattus norvegicus OX=10116 GN=Hmgn5 PE=2 SV=1	HMGN5_RAT	Hmgn5	0.299	0.299	0.299	0.299	0	0.217	0	0.14
Beta-mannosidase OS=Rattus norvegicus OX=10116 GN=Manba PE=2 SV=1	MANBA_RAT	Manba	0.21	0.0998	0.172	0.0998	0.0655	0.0655	0	0.0655
Proline-, glutamic acid- and leucine-rich protein 1 OS=Rattus norvegicus OX=10116 GN=Pelp1 PE=1 SV=2	PELP1_RAT	Pelp1	0.275	0.275	0.176	0.275	0.176	0.176	0.144	0.0842
Mediator of DNA damage checkpoint protein 1 OS=Rattus norvegicus OX=10116 GN=Mdc1 PE=1 SV=2	MDC1_RAT	Mdc1	0.0985	0.0985	0.125	0.125	0.0481	0	0.0481	0.0481
Serine/threonine-protein kinase MARK2 OS=Rattus norvegicus OX=10116 GN=Mark2 PE=1 SV=1	MARK2_RAT	Mark2	0.126	0.126	0.172	0.126	0	0	0	0
Mitochondrial carnitine/acylcarnitine carrier protein OS=Rattus norvegicus OX=10116 GN=Slc25a20 PE=1 SV=1	MCAT_RAT	Slc25a20	0.61	0.61	0.463	0.77	0.21	0.331	0.463	0.331
Sorting and assembly machinery component 50 homolog OS=Rattus norvegicus OX=10116 GN=Samm50 PE=1 SV=1	SAM50_RAT	Samm50	0.13	0.277	0.202	0.277	0	0	0	0.13
Guanine nucleotide-binding protein subunit alpha-11 OS=Rattus norvegicus OX=10116 GN=Gna11 PE=2 SV=1	GNA11_RAT	Gna11	0.973	1.29	0.973	0.973	0.573	0.829	0.573	0.973
Long-chain-fatty-acid--CoA ligase 5 OS=Rattus norvegicus OX=10116 GN=Acsl5 PE=1 SV=1	ACSL5_RAT	Acsl5	0.134	0.182	0.341	0.286	0	0	0	0
Nucleoporin NDC1 OS=Rattus norvegicus OX=10116 GN=Ndc1 PE=1 SV=1	NDC1_RAT	Ndc1	0.235	0.184	0.235	0.235	0.135	0.0881	0.0881	0.0881
Sorbitol dehydrogenase OS=Rattus norvegicus OX=10116 GN=Sord PE=1 SV=4	DHSO_RAT	Sord	0.513	0.392	0.513	0.392	0.282	0.392	0.282	0.392
Transmembrane protein 33 OS=Rattus norvegicus OX=10116 GN=Tmem33 PE=2 SV=1	TMM33_RAT	Tmem33	0.565	0.399	0.399	0.399	0.251	0.251	0.251	0.251
3-hydroxy-3-methylglutaryl-coenzyme A reductase OS=Rattus norvegicus OX=10116 GN=Hmgcr PE=1 SV=2	HMDH_RAT	Hmgcr	0.105	0.142	0.181	0.105	0	0	0	0
Small glutamine-rich tetratricopeptide repeat-containing protein beta OS=Rattus norvegicus OX=10116 GN=Sgtb PE=1 SV=1	SGTB_RAT	Sgtb	0.602	0.761	0.458	0.602	0.327	0.458	0.458	0.327
Heat-stable enterotoxin receptor OS=Rattus norvegicus OX=10116 GN=Gucy2c PE=2 SV=2	GUC2C_RAT	Gucy2c	0.0534	0	0.0534	0.0534	0	0	0	0
RNA-binding protein 47 OS=Rattus norvegicus OX=10116 GN=Rbm47 PE=2 SV=1	RBM47_RAT	Rbm47	0.161	0.105	0.105	0.161	0.105	0	0	0
60S ribosomal protein L34 OS=Rattus norvegicus OX=10116 GN=Rpl34 PE=1 SV=3	RL34_RAT	Rpl34	0.958	0.958	0.958	0.565	0.565	0.565	0.565	0.565
Sulfite oxidase, mitochondrial OS=Rattus norvegicus OX=10116 GN=Suox PE=1 SV=2	SUOX_RAT	Suox	0.171	0.171	0.3	0.171	0.111	0.171	0	0
Phosphatidylinositol transfer protein beta isoform OS=Rattus norvegicus OX=10116 GN=Pitpnb PE=1 SV=2	PIPNB_RAT	Pitpnb	0.65	0.222	0.222	0.492	0	0	0	0.222
Vitamin K-dependent gamma-carboxylase OS=Rattus norvegicus OX=10116 GN=Ggcx PE=1 SV=1	VKGC_RAT	Ggcx	0.076	0.076	0.116	0.076	0.076	0	0	0
ATP-dependent RNA helicase DDX39A OS=Rattus norvegicus OX=10116 GN=Ddx39a PE=2 SV=1	DX39A_RAT	Ddx39a	1.17	0	1.17	1.17	0	0	0	0
Caspase-3 OS=Rattus norvegicus OX=10116 GN=Casp3 PE=2 SV=2	CASP3_RAT	Casp3	0.49	0.647	0.221	0.49	0	0.221	0.221	0
Lysophospholipase D GDPD1 OS=Rattus norvegicus OX=10116 GN=Gdpd1 PE=2 SV=1	GDPD1_RAT	Gdpd1	0.303	0.303	0.193	0.303	0	0	0.193	0
Mucin-13 OS=Rattus norvegicus OX=10116 GN=Muc13 PE=2 SV=1	MUC13_RAT	Muc13	0.473	0.393	0.318	0.556	0	0	0	0
Phosphorylated adapter RNA export protein OS=Rattus norvegicus OX=10116 GN=Phax PE=1 SV=2	PHAX_RAT	Phax	0	0.158	0.158	0.158	0	0	0	0
HBS1-like protein OS=Rattus norvegicus OX=10116 GN=Hbs1l PE=1 SV=1	HBS1L_RAT	Hbs1l	0	0.187	0.137	0.137	0	0	0	0
Probable phospholipid-transporting ATPase IIB OS=Rattus norvegicus OX=10116 GN=Atp9b PE=3 SV=1	ATP9B_RAT	Atp9b	0.0775	0.0775	0	0.051	0	0	0	0
Serine/threonine-protein phosphatase PGAM5, mitochondrial OS=Rattus norvegicus OX=10116 GN=Pgam5 PE=2 SV=1	PGAM5_RAT	Pgam5	0.342	0.48	0.217	0.48	0.217	0.217	0	0
Cysteine and glycine-rich protein 1 OS=Rattus norvegicus OX=10116 GN=Csrp1 PE=1 SV=2	CSRP1_RAT	Csrp1	0.35	0.35	0.569	0.35	0	0	0	0
Epidermal growth factor receptor kinase substrate 8 OS=Rattus norvegicus OX=10116 GN=Eps8 PE=1 SV=2	EPS8_RAT	Eps8	0.0722	0	0.11	0.0722	0	0	0	0
RNA binding protein fox-1 homolog 2 OS=Rattus norvegicus OX=10116 GN=Rbfox2 PE=2 SV=1	RFOX2_RAT	Rbfox2	0.15	0.15	0.15	0.15	0	0.15	0	0
Phosphatidylserine synthase 1 OS=Rattus norvegicus OX=10116 GN=Ptdss1 PE=2 SV=1	PTSS1_RAT	Ptdss1	0.121	0.121	0.121	0.121	0.121	0	0	0
Immunity-related GTPase family M protein OS=Rattus norvegicus OX=10116 GN=Irgm PE=2 SV=1	IRGM_RAT	Irgm	0	0.147	0.147	0.147	0	0	0	0
RNA-binding motif protein, X chromosome retrogene-like OS=Rattus norvegicus OX=10116 GN=Rbmxrtl PE=1 SV=1	RMXRL_RAT	Rbmxrtl	0	1.28	1.28	1.46	0	0	0	0
Retinol-binding protein 1 OS=Rattus norvegicus OX=10116 GN=Rbp1 PE=1 SV=2	RET1_RAT	Rbp1	0.783	0.471	0.471	0	0	0	0	0
Serine/threonine-protein phosphatase 4 catalytic subunit OS=Rattus norvegicus OX=10116 GN=Ppp4c PE=2 SV=1	PP4C_RAT	Ppp4c	0.31	0	0.197	0.197	0	0	0	0
NudC domain-containing protein 2 OS=Rattus norvegicus OX=10116 GN=Nudcd2 PE=2 SV=1	NUDC2_RAT	Nudcd2	0.417	0.417	0	0.417	0	0	0	0
Major prion protein OS=Rattus norvegicus OX=10116 GN=Prnp PE=1 SV=2	PRIO_RAT	Prnp	0.253	0.253	0.253	0.253	0	0.253	0	0
Proteasome inhibitor PI31 subunit OS=Rattus norvegicus OX=10116 GN=Psmf1 PE=1 SV=1	PSMF1_RAT	Psmf1	0.234	0.234	0	0.371	0	0	0	0
Torsin-1A OS=Rattus norvegicus OX=10116 GN=Tor1a PE=1 SV=1	TOR1A_RAT	Tor1a	0.181	0.181	0	0.284	0	0	0	0
Epsin-1 OS=Rattus norvegicus OX=10116 GN=Epn1 PE=1 SV=1	EPN1_RAT	Epn1	0.172	0	0.112	0.112	0	0	0	0
Sigma non-opioid intracellular receptor 1 OS=Rattus norvegicus OX=10116 GN=Sigmar1 PE=1 SV=1	SGMR1_RAT	Sigmar1	0.28	0.28	0	0.28	0	0	0	0
Endoplasmin OS=Rattus norvegicus OX=10116 GN=Hsp90b1 PE=1 SV=2	ENPL_RAT	Hsp90b1	5.47	9.14	8.14	10.2	17.2	17.9	13.3	14.3
Endoplasmic reticulum chaperone BiP OS=Rattus norvegicus OX=10116 GN=Hspa5 PE=1 SV=1	BIP_RAT	Hspa5	11.4	9.89	10.4	9.42	26.6	19.2	13.2	21.1
Transitional endoplasmic reticulum ATPase OS=Rattus norvegicus OX=10116 GN=Vcp PE=1 SV=3	TERA_RAT	Vcp	4.8	6.73	6.2	7.02	8.94	11.3	8.94	8.94
Hypoxia up-regulated protein 1 OS=Rattus norvegicus OX=10116 GN=Hyou1 PE=1 SV=1	HYOU1_RAT	Hyou1	2.08	2.26	0.942	2.08	3.36	4.98	3.23	3.23
Ubiquitin-like modifier-activating enzyme 1 OS=Rattus norvegicus OX=10116 GN=Uba1 PE=1 SV=1	UBA1_RAT	Uba1	3.13	3.36	1.82	4.28	4.73	4.89	4.43	4.28
Secretagogin OS=Rattus norvegicus OX=10116 GN=Scgn PE=1 SV=1	SEGN_RAT	Scgn	40	48.9	36.2	44.3	80.4	72.8	80.4	119
Protein disulfide-isomerase A3 OS=Rattus norvegicus OX=10116 GN=Pdia3 PE=1 SV=2	PDIA3_RAT	Pdia3	5.4	9.04	9.04	7.01	10.9	10.2	13.1	9.04
Staphylococcal nuclease domain-containing protein 1 OS=Rattus norvegicus OX=10116 GN=Snd1 PE=1 SV=1	SND1_RAT	Snd1	2.01	2.63	1.27	2.41	3.53	2.87	3.25	2.75
Phosphoglycerate mutase 1 OS=Rattus norvegicus OX=10116 GN=Pgam1 PE=1 SV=4	PGAM1_RAT	Pgam1	22.4	15.9	11.2	25.1	39.3	35.1	43.9	49
Lysosomal alpha-glucosidase OS=Rattus norvegicus OX=10116 GN=Gaa PE=2 SV=1	LYAG_RAT	Gaa	1	1.48	0.945	1.48	1.71	1.48	1.71	1.8
Fibronectin OS=Rattus norvegicus OX=10116 GN=Fn1 PE=1 SV=2	FINC_RAT	Fn1	0.252	0.329	0.344	0.344	0.744	0.568	0.644	0.606
Fructose-bisphosphate aldolase A OS=Rattus norvegicus OX=10116 GN=Aldoa PE=1 SV=2	ALDOA_RAT	Aldoa	9.32	7.78	6.48	8.52	12.1	11.1	14.4	13.2
Calnexin OS=Rattus norvegicus OX=10116 GN=Canx PE=1 SV=1	CALX_RAT	Canx	1.71	1.58	2.12	1.46	2.6	2.43	2.43	2.28
Calreticulin OS=Rattus norvegicus OX=10116 GN=Calr PE=1 SV=1	CALR_RAT	Calr	2.29	3.02	2.52	2.76	4.59	3.9	5.39	3.02
Sarcoplasmic/endoplasmic reticulum calcium ATPase 3 OS=Rattus norvegicus OX=10116 GN=Atp2a3 PE=1 SV=2	AT2A3_RAT	Atp2a3	0.786	0.888	0.836	0.995	1.11	1.23	0.995	0.995
Vinculin OS=Rattus norvegicus OX=10116 GN=Vcl PE=1 SV=1	VINC_RAT	Vcl	0.688	0.833	0.554	0.735	0.991	1.16	1.1	0.937
Malate dehydrogenase, cytoplasmic OS=Rattus norvegicus OX=10116 GN=Mdh1 PE=1 SV=3	MDHC_RAT	Mdh1	3.37	5.18	3.37	4.19	6.35	5.18	6.35	7.01
Nucleolin OS=Rattus norvegicus OX=10116 GN=Ncl PE=1 SV=3	NUCL_RAT	Ncl	1.11	1.49	1.2	1.39	1.7	1.82	1.49	1.59
Dihydropyrimidinase-related protein 1 OS=Rattus norvegicus OX=10116 GN=Crmp1 PE=1 SV=1	DPYL1_RAT	Crmp1	1.52	1.52	1.79	1.79	2.61	2.8	1.94	2.09
Synaptotagmin-like protein 4 OS=Rattus norvegicus OX=10116 GN=Sytl4 PE=1 SV=1	SYTL4_RAT	Sytl4	0.401	0.882	0.73	0.73	1.32	1.32	0.964	0.964
Myosin-10 OS=Rattus norvegicus OX=10116 GN=Myh10 PE=1 SV=1	MYH10_RAT	Myh10	0.253	0.184	0.289	0.151	0.289	0.289	0.422	0.402
Protein disulfide-isomerase A4 OS=Rattus norvegicus OX=10116 GN=Pdia4 PE=1 SV=2	PDIA4_RAT	Pdia4	0.695	1.21	1.11	0.933	2.14	2.42	1.63	1.87
Dolichyl-diphosphooligosaccharide--protein glycosyltransferase subunit 1 OS=Rattus norvegicus OX=10116 GN=Rpn1 PE=2 SV=1	RPN1_RAT	Rpn1	0.837	0.925	0.837	0.673	1.55	1.21	1.02	1.11
2-oxoglutarate dehydrogenase, mitochondrial OS=Rattus norvegicus OX=10116 GN=Ogdh PE=1 SV=1	ODO1_RAT	Ogdh	0.513	0.556	0.282	0.738	0.836	0.786	0.786	0.69
AP2-interacting clathrin-endocytosis protein OS=Rattus norvegicus OX=10116 GN=Kiaa1107 PE=1 SV=2	K1107_RAT	Kiaa1107	0.14	0.216	0.165	0.19	0.448	0.48	0.298	0.298
Phosphoglucomutase-1 OS=Rattus norvegicus OX=10116 GN=Pgm1 PE=1 SV=2	PGM1_RAT	Pgm1	1.18	1.42	1.3	0.964	1.83	1.68	1.55	1.42
Triosephosphate isomerase OS=Rattus norvegicus OX=10116 GN=Tpi1 PE=1 SV=2	TPIS_RAT	Tpi1	5.45	4.74	5.45	4.74	6.25	8.15	7.14	6.25
Extended synaptotagmin-1 OS=Rattus norvegicus OX=10116 GN=Esyt1 PE=1 SV=1	ESYT1_RAT	Esyt1	0.236	0.339	0.142	0.528	0.655	0.612	0.94	0.655
Protein NDRG1 OS=Rattus norvegicus OX=10116 GN=Ndrg1 PE=1 SV=1	NDRG1_RAT	Ndrg1	0.676	1.25	1.09	1.09	1.42	1.61	1.61	1.61
Peptidyl-prolyl cis-trans isomerase B OS=Rattus norvegicus OX=10116 GN=Ppib PE=1 SV=3	PPIB_RAT	Ppib	3.23	3.83	2.71	3.83	3.83	4.5	5.28	4.5
Cathepsin D OS=Rattus norvegicus OX=10116 GN=Ctsd PE=1 SV=1	CATD_RAT	Ctsd	0.766	0.896	0.896	0.896	1.04	1.04	1.04	0.896
Protein sel-1 homolog 1 OS=Rattus norvegicus OX=10116 GN=Sel1l PE=1 SV=2	SE1L1_RAT	Sel1l	0.288	0.198	0.335	0.242	0.488	0.488	0.488	0.488
Nitric oxide synthase, brain OS=Rattus norvegicus OX=10116 GN=Nos1 PE=1 SV=1	NOS1_RAT	Nos1	0.0409	0	0	0	0.247	0.222	0.151	0.151
AP-1 complex subunit beta-1 OS=Rattus norvegicus OX=10116 GN=Ap1b1 PE=1 SV=1	AP1B1_RAT	Ap1b1	0.445	0.847	0.359	0.904	1.09	1.15	0.964	1.02
Nucleobindin-2 OS=Rattus norvegicus OX=10116 GN=Nucb2 PE=1 SV=1	NUCB2_RAT	Nucb2	0.464	0.21	0.135	0.289	0.771	0.559	0.559	0.374
Proteasome subunit alpha type-2 OS=Rattus norvegicus OX=10116 GN=Psma2 PE=1 SV=3	PSA2_RAT	Psma2	1.63	1.97	1.97	1.07	3.26	2.35	1.97	3.26
Ornithine aminotransferase, mitochondrial OS=Rattus norvegicus OX=10116 GN=Oat PE=1 SV=1	OAT_RAT	Oat	0.389	0.585	0.389	0.484	1.06	0.93	0.93	0.807
Alpha-N-acetylgalactosaminidase OS=Rattus norvegicus OX=10116 GN=Naga PE=2 SV=1	NAGAB_RAT	Naga	0.311	0.84	0.607	0.72	0.84	1.11	1.25	0.84
Alpha-aminoadipic semialdehyde dehydrogenase OS=Rattus norvegicus OX=10116 GN=Aldh7a1 PE=1 SV=2	AL7A1_RAT	Aldh7a1	0.115	0.177	0.312	0.312	0.544	1.02	0.385	0.462
Proteasome activator complex subunit 2 OS=Rattus norvegicus OX=10116 GN=Psme2 PE=2 SV=3	PSME2_RAT	Psme2	0.418	1.26	0.594	1.54	1.54	1.54	2.21	2.6
ATP-dependent 6-phosphofructokinase, platelet type OS=Rattus norvegicus OX=10116 GN=Pfkp PE=1 SV=2	PFKAP_RAT	Pfkp	0.299	0	0.161	0	0.751	0.566	0.299	0.348
Acid ceramidase OS=Rattus norvegicus OX=10116 GN=Asah1 PE=1 SV=1	ASAH1_RAT	Asah1	0.429	0.429	0.331	0.649	0.771	0.535	0.902	0.902
Nardilysin OS=Rattus norvegicus OX=10116 GN=Nrdc PE=1 SV=1	NRDC_RAT	Nrdc	0.0753	0.129	0.0753	0.129	0.369	0.243	0.274	0.213
Amphiphysin OS=Rattus norvegicus OX=10116 GN=Amph PE=1 SV=1	AMPH_RAT	Amph	0.186	0.137	0	0.137	0.292	0.238	0.238	0.238
Proteasome subunit alpha type-6 OS=Rattus norvegicus OX=10116 GN=Psma6 PE=1 SV=1	PSA6_RAT	Psma6	0.985	0.985	1.22	0.985	1.49	1.22	1.8	2.51
Nuclear pore complex protein Nup107 OS=Rattus norvegicus OX=10116 GN=Nup107 PE=1 SV=1	NU107_RAT	Nup107	0.094	0.094	0	0.127	0.127	0.162	0.162	0.197
Receptor-type tyrosine-protein phosphatase zeta OS=Rattus norvegicus OX=10116 GN=Ptprz1 PE=1 SV=1	PTPRZ_RAT	Ptprz1	0.0256	0.0256	0	0.0256	0.106	0.0652	0.0925	0.0652
Coronin-7 OS=Rattus norvegicus OX=10116 GN=Coro7 PE=1 SV=2	CORO7_RAT	Coro7	0.0658	0.136	0.0658	0.136	0.25	0.375	0.375	0.25
Nucleobindin-1 OS=Rattus norvegicus OX=10116 GN=Nucb1 PE=1 SV=1	NUCB1_RAT	Nucb1	0	0.126	0.126	0	0.195	0.346	0.195	0.346
Myc box-dependent-interacting protein 1 OS=Rattus norvegicus OX=10116 GN=Bin1 PE=1 SV=1	BIN1_RAT	Bin1	0	0.16	0	0.16	0.281	0.281	0.16	0.219
Beta-hexosaminidase subunit beta OS=Rattus norvegicus OX=10116 GN=Hexb PE=2 SV=1	HEXB_RAT	Hexb	0.168	0.109	0.109	0.109	0.168	0.168	0.23	0.296
A-kinase anchor protein 12 OS=Rattus norvegicus OX=10116 GN=Akap12 PE=1 SV=1	AKA12_RAT	Akap12	0	0	0	0	0.0548	0.093	0.093	0.0362
Dipeptidyl aminopeptidase-like protein 6 OS=Rattus norvegicus OX=10116 GN=Dpp6 PE=1 SV=1	DPP6_RAT	Dpp6	0.104	0	0	0	0.179	0.104	0.104	0.141
Small glutamine-rich tetratricopeptide repeat-containing protein alpha OS=Rattus norvegicus OX=10116 GN=Sgta PE=1 SV=1	SGTA_RAT	Sgta	0.446	0.446	0.319	0.586	0.739	0.586	0.586	0.907
Prolyl 4-hydroxylase subunit alpha-1 OS=Rattus norvegicus OX=10116 GN=P4ha1 PE=2 SV=2	P4HA1_RAT	P4ha1	0	0	0	0	0.111	0.111	0	0.111
Protein BUD31 homolog OS=Rattus norvegicus OX=10116 GN=Bud31 PE=2 SV=2	BUD31_RAT	Bud31	0.72	0.72	0.72	0.72	1.47	1.06	1.06	1.47
Guanine nucleotide-binding protein-like 1 OS=Rattus norvegicus OX=10116 GN=Gnl1 PE=1 SV=1	GNL1_RAT	Gnl1	0	0	0	0.0974	0.262	0.204	0.0974	0.0974
Rab proteins geranylgeranyltransferase component A 1 OS=Rattus norvegicus OX=10116 GN=Chm PE=1 SV=1	RAE1_RAT	Chm	0	0	0	0	0	0.0922	0.0922	0.0922
Trafficking protein particle complex subunit 3 OS=Rattus norvegicus OX=10116 GN=Trappc3 PE=2 SV=1	TPPC3_RAT	Trappc3	0.58	0.58	0.58	0.58	0.84	0.84	0.58	0.84
Calcium load-activated calcium channel OS=Rattus norvegicus OX=10116 GN=Tmco1 PE=2 SV=1	TMCO1_RAT	Tmco1	0	0	0	0	0.34	0.34	0	0.34
Insulin-2 OS=Rattus norvegicus OX=10116 GN=Ins2 PE=1 SV=1	INS2_RAT	Ins2	1.08	0.631	0.631	1.08	3.34	2.4	3.34	1.66
Calcium/calmodulin-dependent protein kinase type IV OS=Rattus norvegicus OX=10116 GN=Camk4 PE=1 SV=3	KCC4_RAT	Camk4	0	0	0	0	0.127	0.127	0.127	0
Tripeptidyl-peptidase 1 OS=Rattus norvegicus OX=10116 GN=Tpp1 PE=1 SV=1	TPP1_RAT	Tpp1	0	0	0	0	0.11	0.11	0.169	0.11
Lysosomal acid phosphatase OS=Rattus norvegicus OX=10116 GN=Acp2 PE=1 SV=1	PPAL_RAT	Acp2	0	0	0	0	0.218	0.141	0.218	0
2-oxoisovalerate dehydrogenase subunit alpha, mitochondrial (Fragment) OS=Rattus norvegicus OX=10116 GN=Bckdha PE=1 SV=1	ODBA_RAT	Bckdha	0	0	0	0	0.135	0.135	0.135	0
V-type proton ATPase subunit S1 OS=Rattus norvegicus OX=10116 GN=Atp6ap1 PE=2 SV=1	VAS1_RAT	Atp6ap1	0	0	0	0	0.133	0.205	0.133	0.133
ATP-citrate synthase OS=Rattus norvegicus OX=10116 GN=Acly PE=1 SV=1	ACLY_RAT	Acly	26.2	21.6	18.2	24.8	30.1	29.3	25.5	22.2
Cytoplasmic dynein 1 heavy chain 1 OS=Rattus norvegicus OX=10116 GN=Dync1h1 PE=1 SV=1	DYHC1_RAT	Dync1h1	3.43	3.07	3.76	3.04	5.49	2.58	2.19	2.02
Clathrin heavy chain 1 OS=Rattus norvegicus OX=10116 GN=Cltc PE=1 SV=3	CLH1_RAT	Cltc	8.52	9.01	8.36	10.1	11.5	7.32	7.18	5.58
Microtubule-actin cross-linking factor 1 OS=Rattus norvegicus OX=10116 GN=Macf1 PE=1 SV=1	MACF1_RAT	Macf1	1.32	0.89	1.43	0.851	2.52	0.96	1	0.95
Spectrin alpha chain, non-erythrocytic 1 OS=Rattus norvegicus OX=10116 GN=Sptan1 PE=1 SV=2	SPTN1_RAT	Sptan1	3.27	3.73	3.78	3.67	4.67	3.47	4.8	4.06
Plectin OS=Rattus norvegicus OX=10116 GN=Plec PE=1 SV=2	PLEC_RAT	Plec	1.72	1.22	2.1	1.2	2.66	1.08	0.912	0.81
Pyruvate kinase PKM OS=Rattus norvegicus OX=10116 GN=Pkm PE=1 SV=3	KPYM_RAT	Pkm	13.9	17.5	20.9	15.6	20.9	22.1	12.3	15.6
Glyceraldehyde-3-phosphate dehydrogenase OS=Rattus norvegicus OX=10116 GN=Gapdh PE=1 SV=3	G3P_RAT	Gapdh	164	105	67.4	96.2	105	96.2	179	115
Tubulin alpha-1B chain OS=Rattus norvegicus OX=10116 GN=Tuba1b PE=1 SV=1	TBA1B_RAT	Tuba1b	8.18	12.4	13.3	16.3	12.4	14.2	10.8	11.6
Fatty acid synthase OS=Rattus norvegicus OX=10116 GN=Fasn PE=1 SV=3	FAS_RAT	Fasn	1.87	1.87	2.08	1.7	2.01	1.29	1.58	1.64
ATP synthase subunit beta, mitochondrial OS=Rattus norvegicus OX=10116 GN=Atp5f1b PE=1 SV=2	ATPB_RAT	Atp5f1b	24.2	40.9	43.3	48.6	43.3	28.8	54.5	57.8
Tubulin beta-5 chain OS=Rattus norvegicus OX=10116 GN=Tubb5 PE=1 SV=1	TBB5_RAT	Tubb5	55.5	37.5	52	35.1	48.7	42.7	35.1	28.8
Elongation factor 2 OS=Rattus norvegicus OX=10116 GN=Eef2 PE=1 SV=4	EF2_RAT	Eef2	9.54	13.8	9.54	9.9	9.9	7.62	9.54	9.2
Actin, cytoplasmic 2 OS=Rattus norvegicus OX=10116 GN=Actg1 PE=1 SV=1	ACTG_RAT	Actg1	34.4	34.4	31.8	37.2	31.8	31.8	40.2	31.8
Elongation factor 1-alpha 1 OS=Rattus norvegicus OX=10116 GN=Eef1a1 PE=2 SV=1	EF1A1_RAT	Eef1a1	3.04	4.21	3.59	4.21	4.91	3.59	2.56	2.56
Alpha-enolase OS=Rattus norvegicus OX=10116 GN=Eno1 PE=1 SV=4	ENOA_RAT	Eno1	21.3	26.2	28.1	32.4	52.5	26.2	42.7	32.4
Heat shock cognate 71 kDa protein OS=Rattus norvegicus OX=10116 GN=Hspa8 PE=1 SV=1	HSP7C_RAT	Hspa8	17.8	17.8	20.5	16.1	28.5	22.5	12.7	14.7
Sarcoplasmic/endoplasmic reticulum calcium ATPase 2 OS=Rattus norvegicus OX=10116 GN=Atp2a2 PE=1 SV=1	AT2A2_RAT	Atp2a2	2.24	2.83	2.52	3.17	2.62	2.62	2.62	2.33
E3 ubiquitin-protein ligase UBR4 OS=Rattus norvegicus OX=10116 GN=Ubr4 PE=1 SV=2	UBR4_RAT	Ubr4	0.698	0.561	0.786	0.66	0.708	0.426	0.394	0.34
Myosin-9 OS=Rattus norvegicus OX=10116 GN=Myh9 PE=1 SV=3	MYH9_RAT	Myh9	1.95	1.16	2.4	1.52	1.52	1.83	2.87	2.4
Heat shock protein HSP 90-beta OS=Rattus norvegicus OX=10116 GN=Hsp90ab1 PE=1 SV=4	HS90B_RAT	Hsp90ab1	10.7	10.3	11.2	11.6	12.1	8.66	7.61	7.28
ATP synthase subunit alpha, mitochondrial OS=Rattus norvegicus OX=10116 GN=Atp5f1a PE=1 SV=2	ATPA_RAT	Atp5f1a	10	9.47	7.45	12.7	11.3	6.2	7.45	8.41
U5 small nuclear ribonucleoprotein 200 kDa helicase OS=Rattus norvegicus OX=10116 GN=Snrnp200 PE=1 SV=1	U520_RAT	Snrnp200	1.32	1.32	1.32	1.2	1.32	1.26	1.2	1.15
ADP/ATP translocase 2 OS=Rattus norvegicus OX=10116 GN=Slc25a5 PE=1 SV=3	ADT2_RAT	Slc25a5	8.06	13.6	12.3	12.3	13.6	8.06	11.1	13.6
UDP-glucose:glycoprotein glucosyltransferase 1 OS=Rattus norvegicus OX=10116 GN=Uggt1 PE=1 SV=2	UGGG1_RAT	Uggt1	1.83	2.72	1.99	2.86	2.34	1.78	1.99	1.73
Trifunctional enzyme subunit alpha, mitochondrial OS=Rattus norvegicus OX=10116 GN=Hadha PE=1 SV=2	ECHA_RAT	Hadha	5.42	5.68	6.22	5.42	5.18	5.68	4.72	4.09
60 kDa heat shock protein, mitochondrial OS=Rattus norvegicus OX=10116 GN=Hspd1 PE=1 SV=1	CH60_RAT	Hspd1	14.2	20.9	17.7	22.1	15	17.7	20.9	15.9
Peripherin OS=Rattus norvegicus OX=10116 GN=Prph PE=1 SV=1	PERI_RAT	Prph	9.79	14.4	14.4	16.4	11.2	12.7	9.17	9.79
Leucine-rich PPR motif-containing protein, mitochondrial OS=Rattus norvegicus OX=10116 GN=Lrpprc PE=1 SV=1	LPPRC_RAT	Lrpprc	1.97	2.03	1.05	2.03	1.79	1.85	1.68	1.47
Histone H2B type 1 OS=Rattus norvegicus OX=10116 PE=1 SV=2	H2B1_RAT		94.8	76.1	183	61	118	147	147	118
Heat shock 70 kDa protein 4 OS=Rattus norvegicus OX=10116 GN=Hspa4 PE=1 SV=1	HSP74_RAT	Hspa4	2.91	3.96	1.43	3.64	3.48	3.8	3.04	3.48
Sodium/potassium-transporting ATPase subunit alpha-1 OS=Rattus norvegicus OX=10116 GN=Atp1a1 PE=1 SV=1	AT1A1_RAT	Atp1a1	1.34	2.3	1.41	2.11	1.03	1.34	1.48	1.28
Hydroxyacyl-coenzyme A dehydrogenase, mitochondrial OS=Rattus norvegicus OX=10116 GN=Hadh PE=2 SV=1	HCDH_RAT	Hadh	16.1	8.88	8.01	21.5	6.5	17.8	38	31.5
Nucleoprotein TPR OS=Rattus norvegicus OX=10116 GN=Tpr PE=1 SV=1	TPR_RAT	Tpr	0.526	0.721	0.742	0.68	0.701	0.582	0.601	0.544
14-3-3 protein epsilon OS=Rattus norvegicus OX=10116 GN=Ywhae PE=1 SV=1	1433E_RAT	Ywhae	173	101	101	112	239	155	112	112
Aconitate hydratase, mitochondrial OS=Rattus norvegicus OX=10116 GN=Aco2 PE=1 SV=2	ACON_RAT	Aco2	3.83	3.48	4.41	3.83	3.32	3.83	3.16	4.21
Rab GDP dissociation inhibitor beta OS=Rattus norvegicus OX=10116 GN=Gdi2 PE=1 SV=2	GDIB_RAT	Gdi2	4.82	13.1	13.1	9.26	6.98	14	7.5	5.61
Pyruvate kinase PKLR OS=Rattus norvegicus OX=10116 GN=Pklr PE=1 SV=2	KPYR_RAT	Pklr	2.8	6.02	4.44	7.62	2.61	3.43	2.8	2.61
Cullin-associated NEDD8-dissociated protein 1 OS=Rattus norvegicus OX=10116 GN=Cand1 PE=1 SV=1	CAND1_RAT	Cand1	2.1	2.1	1.18	2.49	2.57	2.33	1.82	2.18
Glucose-6-phosphate isomerase OS=Rattus norvegicus OX=10116 GN=Gpi PE=1 SV=1	G6PI_RAT	Gpi	5.54	10.4	7.02	8.82	4.91	7.02	8.33	6.24
Heterogeneous nuclear ribonucleoprotein U OS=Rattus norvegicus OX=10116 GN=Hnrnpu PE=1 SV=1	HNRPU_RAT	Hnrnpu	1.49	1.68	1.58	1.99	1.68	1.23	1.23	1.32
Alpha-actinin-4 OS=Rattus norvegicus OX=10116 GN=Actn4 PE=1 SV=2	ACTN4_RAT	Actn4	2.96	5.26	1.5	3.34	5.08	4.06	4.71	4.06
Microtubule-associated protein 1A OS=Rattus norvegicus OX=10116 GN=Map1a PE=1 SV=1	MAP1A_RAT	Map1a	0.751	0.427	0.732	0.427	0.677	0.555	0.267	0.267
Voltage-dependent anion-selective channel protein 1 OS=Rattus norvegicus OX=10116 GN=Vdac1 PE=1 SV=4	VDAC1_RAT	Vdac1	28.2	25.3	22.8	20.5	10.6	16.5	20.5	25.3
Nucleophosmin OS=Rattus norvegicus OX=10116 GN=Npm1 PE=1 SV=1	NPM_RAT	Npm1	7.41	7.41	10.2	4.18	5.93	4.71	4.71	5.29
Chromogranin-A OS=Rattus norvegicus OX=10116 GN=Chga PE=1 SV=1	CMGA_RAT	Chga	4.55	2.84	3.91	3.35	5.27	3.35	3.35	2.4
60S ribosomal protein L3 OS=Rattus norvegicus OX=10116 GN=Rpl3 PE=1 SV=3	RL3_RAT	Rpl3	2.97	4.6	2.7	4.22	2.01	1.81	3.25	3.25
Polypyrimidine tract-binding protein 1 OS=Rattus norvegicus OX=10116 GN=Ptbp1 PE=1 SV=1	PTBP1_RAT	Ptbp1	2.83	2.44	2.44	3.27	2.63	3.27	1.78	1.78
Pyruvate carboxylase, mitochondrial OS=Rattus norvegicus OX=10116 GN=Pc PE=1 SV=2	PYC_RAT	Pc	1.38	1.69	1.05	1.69	1.69	1.76	1.5	1.16
Protein disulfide-isomerase OS=Rattus norvegicus OX=10116 GN=P4hb PE=1 SV=2	PDIA1_RAT	P4hb	5.33	5.7	3.53	7.37	4.99	8.37	8.37	6.49
Elongation factor 1-alpha 2 OS=Rattus norvegicus OX=10116 GN=Eef1a2 PE=1 SV=1	EF1A2_RAT	Eef1a2	3	4.85	4.15	3.84	4.49	4.15	3.54	4.15
Transketolase OS=Rattus norvegicus OX=10116 GN=Tkt PE=1 SV=1	TKT_RAT	Tkt	3.32	3.53	5.31	4.22	5.93	3.98	3.32	3.12
Phosphoglycerate kinase 1 OS=Rattus norvegicus OX=10116 GN=Pgk1 PE=1 SV=2	PGK1_RAT	Pgk1	4.15	12	7.47	8.1	8.1	12	12	12
Heterogeneous nuclear ribonucleoprotein M OS=Rattus norvegicus OX=10116 GN=Hnrnpm PE=1 SV=4	HNRPM_RAT	Hnrnpm	2.52	3.76	4.2	4.92	5.45	5.45	2.84	3.18
Dolichyl-diphosphooligosaccharide--protein glycosyltransferase subunit 2 OS=Rattus norvegicus OX=10116 GN=Rpn2 PE=2 SV=2	RPN2_RAT	Rpn2	1.41	1.64	1.52	1.52	2.03	1.64	1.52	1.3
Ubiquitin-60S ribosomal protein L40 OS=Rattus norvegicus OX=10116 GN=Uba52 PE=1 SV=2	RL40_RAT	Uba52	4.22	2.45	2.45	3.24	2.45	1.28	3.24	1.81
Heterogeneous nuclear ribonucleoprotein K OS=Rattus norvegicus OX=10116 GN=Hnrnpk PE=1 SV=1	HNRPK_RAT	Hnrnpk	8.45	7.88	7.34	7.88	7.34	8.45	8.45	6.84
Coatomer subunit beta OS=Rattus norvegicus OX=10116 GN=Copb1 PE=1 SV=1	COPB_RAT	Copb1	1.39	1.32	0.522	1.69	1.77	2.32	1.61	1.39
Matrin-3 OS=Rattus norvegicus OX=10116 GN=Matr3 PE=1 SV=2	MATR3_RAT	Matr3	1.87	2.28	1.59	2.4	2.28	2.51	2.07	2.17
Adenylyl cyclase-associated protein 1 OS=Rattus norvegicus OX=10116 GN=Cap1 PE=1 SV=3	CAP1_RAT	Cap1	2.04	3.4	2.66	3.14	2.89	2.89	2.44	2.66
Importin subunit beta-1 OS=Rattus norvegicus OX=10116 GN=Kpnb1 PE=1 SV=1	IMB1_RAT	Kpnb1	1.98	2.63	1.69	3.01	3.01	3.01	2.18	2.18
AP-2 complex subunit beta OS=Rattus norvegicus OX=10116 GN=Ap2b1 PE=1 SV=1	AP2B1_RAT	Ap2b1	1.44	2.31	0.906	2.02	2.52	2.63	2.02	2.21
T-complex protein 1 subunit alpha OS=Rattus norvegicus OX=10116 GN=Tcp1 PE=1 SV=1	TCPA_RAT	Tcp1	2.95	4.15	3.4	5.71	5.71	5.37	3.63	3.89
Dynactin subunit 1 OS=Rattus norvegicus OX=10116 GN=Dctn1 PE=1 SV=2	DCTN1_RAT	Dctn1	1.31	1.11	0.646	1.16	0.974	0.886	1.07	0.762
Glycerol-3-phosphate dehydrogenase, mitochondrial OS=Rattus norvegicus OX=10116 GN=Gpd2 PE=1 SV=1	GPDM_RAT	Gpd2	2.27	3.15	2.15	2.41	2.84	2.69	2.27	2.03
Heterogeneous nuclear ribonucleoprotein L OS=Rattus norvegicus OX=10116 GN=Hnrnpl PE=1 SV=2	HNRPL_RAT	Hnrnpl	4.45	5.57	3.96	4.45	5.89	5.27	3.51	3.3
40S ribosomal protein S3 OS=Rattus norvegicus OX=10116 GN=Rps3 PE=1 SV=1	RS3_RAT	Rps3	10.8	15.8	7.28	10.8	4.82	10.8	7.28	8.31
NADPH--cytochrome P450 reductase OS=Rattus norvegicus OX=10116 GN=Por PE=1 SV=3	NCPR_RAT	Por	2.34	3.28	2.78	4.06	3.85	3.47	3.11	2.48
Non-POU domain-containing octamer-binding protein OS=Rattus norvegicus OX=10116 GN=Nono PE=1 SV=3	NONO_RAT	Nono	2.19	4.37	5.02	4.69	4.06	5.38	2.58	3.51
Histone H4 OS=Rattus norvegicus OX=10116 GN=Hist1h4b PE=1 SV=2	H4_RAT	Hist1h4b	336	151	151	198	198	116	258	438
Stress-70 protein, mitochondrial OS=Rattus norvegicus OX=10116 GN=Hspa9 PE=1 SV=3	GRP75_RAT	Hspa9	2.83	2.36	2.67	3	3.75	4.18	2.51	2.51
Exportin-1 OS=Rattus norvegicus OX=10116 GN=Xpo1 PE=1 SV=1	XPO1_RAT	Xpo1	1.49	1.92	0.6	2.16	1.7	1.99	1.63	1.49
Ras-related protein Rab-1A OS=Rattus norvegicus OX=10116 GN=Rab1A PE=1 SV=3	RAB1A_RAT	Rab1A	19.5	14.6	19.5	30	22.6	26	19.5	22.6
ADP-ribosylation factor 3 OS=Rattus norvegicus OX=10116 GN=Arf3 PE=2 SV=2	ARF3_RAT	Arf3	31.2	19.4	16.6	26.7	19.4	31.2	22.8	22.8
Phosphate carrier protein, mitochondrial OS=Rattus norvegicus OX=10116 GN=Slc25a3 PE=1 SV=1	MPCP_RAT	Slc25a3	2.08	2.08	2.33	2.33	1.84	2.33	1.84	2.61
A-kinase anchor protein SPHKAP OS=Rattus norvegicus OX=10116 GN=Sphkap PE=1 SV=1	SPKAP_RAT	Sphkap	0.811	0.811	0.843	0.749	0.779	0.749	0.942	0.749
Stress-induced-phosphoprotein 1 OS=Rattus norvegicus OX=10116 GN=Stip1 PE=1 SV=1	STIP1_RAT	Stip1	3.62	4.12	3.39	3.86	7.53	3.62	2.97	2.77
Elongation factor 1-gamma OS=Rattus norvegicus OX=10116 GN=Eef1g PE=2 SV=3	EF1G_RAT	Eef1g	4.21	4.21	3.31	3.59	3.59	4.21	3.04	2.79
Coatomer subunit beta' OS=Rattus norvegicus OX=10116 GN=Copb2 PE=1 SV=3	COPB2_RAT	Copb2	0.757	0.813	0.502	0.813	0.991	1.05	1.05	0.757
Rab GDP dissociation inhibitor alpha OS=Rattus norvegicus OX=10116 GN=Gdi1 PE=1 SV=1	GDIA_RAT	Gdi1	5.61	9.26	5.61	7.5	9.93	10.6	7.5	8.05
GTP-binding nuclear protein Ran OS=Rattus norvegicus OX=10116 GN=Ran PE=1 SV=3	RAN_RAT	Ran	4.26	4.98	4.26	4.98	3.63	3.08	4.26	5.8
Kinesin-1 heavy chain OS=Rattus norvegicus OX=10116 GN=Kif5b PE=1 SV=1	KINH_RAT	Kif5b	1.27	1.41	0.746	1.56	1.71	1.21	1.56	1.48
60S ribosomal protein L5 OS=Rattus norvegicus OX=10116 GN=Rpl5 PE=1 SV=3	RL5_RAT	Rpl5	2	4.2	2.61	3.75	1.5	2.95	3.33	2
Structural maintenance of chromosomes protein 3 OS=Rattus norvegicus OX=10116 GN=Smc3 PE=1 SV=1	SMC3_RAT	Smc3	0.829	0.706	0.417	0.628	0.829	0.916	0.872	0.667
General transcription factor II-I OS=Rattus norvegicus OX=10116 GN=Gtf2i PE=1 SV=2	GTF2I_RAT	Gtf2i	1.4	1.94	0.899	1.69	1.26	1.86	1.2	1.2
Trifunctional enzyme subunit beta, mitochondrial OS=Rattus norvegicus OX=10116 GN=Hadhb PE=1 SV=1	ECHB_RAT	Hadhb	2.67	4.31	3.7	3.99	3.15	3.99	2.9	1.86
Malate dehydrogenase, mitochondrial OS=Rattus norvegicus OX=10116 GN=Mdh2 PE=1 SV=2	MDHM_RAT	Mdh2	13.2	6.66	8.15	7.37	3.12	6.02	9.92	6.66
26S proteasome non-ATPase regulatory subunit 2 OS=Rattus norvegicus OX=10116 GN=Psmd2 PE=1 SV=1	PSMD2_RAT	Psmd2	1.7	2.38	1.37	2.17	1.97	1.88	1.7	1.45
T-complex protein 1 subunit beta OS=Rattus norvegicus OX=10116 GN=Cct2 PE=1 SV=3	TCPB_RAT	Cct2	3.48	4.59	3.48	5.6	3.23	5.6	3.48	5.24
14-3-3 protein zeta/delta OS=Rattus norvegicus OX=10116 GN=Ywhaz PE=1 SV=1	1433Z_RAT	Ywhaz	32.1	20.1	17.8	36.1	40.5	80.7	32.1	36.1
Eukaryotic translation initiation factor 3 subunit B OS=Rattus norvegicus OX=10116 GN=Eif3b PE=1 SV=1	EIF3B_RAT	Eif3b	1.02	1.17	0.638	1.17	1.25	1.1	0.82	0.82
Valine--tRNA ligase OS=Rattus norvegicus OX=10116 GN=Vars PE=2 SV=2	SYVC_RAT	Vars	0.694	0.814	0.545	0.814	0.814	0.733	0.41	0.545
Eukaryotic initiation factor 4A-II OS=Rattus norvegicus OX=10116 GN=Eif4a2 PE=1 SV=1	IF4A2_RAT	Eif4a2	2.93	5.34	4.16	4.92	5.34	2.93	6.78	5.34
Dihydropyrimidinase-related protein 2 OS=Rattus norvegicus OX=10116 GN=Dpysl2 PE=1 SV=1	DPYL2_RAT	Dpysl2	2.99	3.42	4.15	4.15	5.32	4.15	3.89	2.6
Protein transport protein Sec31A OS=Rattus norvegicus OX=10116 GN=Sec31a PE=1 SV=2	SC31A_RAT	Sec31a	0.812	0.647	0.463	0.9	1.04	1.14	0.9	0.812
14-3-3 protein gamma OS=Rattus norvegicus OX=10116 GN=Ywhag PE=1 SV=2	1433G_RAT	Ywhag	18.9	23.8	16.8	13.3	16.8	11.8	21.2	23.8
T-complex protein 1 subunit epsilon OS=Rattus norvegicus OX=10116 GN=Cct5 PE=1 SV=1	TCPE_RAT	Cct5	2.25	2.08	1.36	3.25	2.43	2.43	2.25	1.49
Prelamin-A/C OS=Rattus norvegicus OX=10116 GN=Lmna PE=1 SV=1	LMNA_RAT	Lmna	2.64	2.96	3.32	3.51	3.32	3.32	2.48	2.48
Glycine--tRNA ligase (Fragment) OS=Rattus norvegicus OX=10116 GN=Gars PE=1 SV=1	GARS_RAT	Gars	2.46	1.9	2.17	2.31	2.78	3.13	2.03	1.54
Afadin OS=Rattus norvegicus OX=10116 GN=Afdn PE=1 SV=1	AFAD_RAT	Afdn	0.364	0.302	0.302	0.364	0.407	0.262	0.451	0.343
60S ribosomal protein L7 OS=Rattus norvegicus OX=10116 GN=Rpl7 PE=1 SV=2	RL7_RAT	Rpl7	3.74	5.46	3.27	9.85	2.85	2.85	4.83	4.25
Lamin-B1 OS=Rattus norvegicus OX=10116 GN=Lmnb1 PE=1 SV=3	LMNB1_RAT	Lmnb1	2.31	2.65	3.42	4.35	2.83	3.86	2.31	3.42
Peptidyl-prolyl cis-trans isomerase A OS=Rattus norvegicus OX=10116 GN=Ppia PE=1 SV=2	PPIA_RAT	Ppia	36.3	30.4	17.7	21.2	36.3	17.7	36.3	25.4
Syntaxin-binding protein 1 OS=Rattus norvegicus OX=10116 GN=Stxbp1 PE=1 SV=1	STXB1_RAT	Stxbp1	1.34	2.26	2.76	2.26	2.94	2.94	3.54	1.97
Transcription intermediary factor 1-beta OS=Rattus norvegicus OX=10116 GN=Trim28 PE=1 SV=2	TIF1B_RAT	Trim28	1.46	1.55	0.983	1.84	1.74	1.95	1.74	1.46
Glutamate dehydrogenase 1, mitochondrial OS=Rattus norvegicus OX=10116 GN=Glud1 PE=1 SV=2	DHE3_RAT	Glud1	2.66	2.66	4.27	3.51	2.66	2.3	2.86	2.48
A-kinase anchor protein 13 OS=Rattus norvegicus OX=10116 GN=Akap13 PE=1 SV=2	AKP13_RAT	Akap13	0.149	0.149	0.239	0.125	0.125	0.137	0.137	0.125
T-complex protein 1 subunit gamma OS=Rattus norvegicus OX=10116 GN=Cct3 PE=1 SV=1	TCPG_RAT	Cct3	2.02	2.72	2.93	3.36	2.02	2.72	2.35	2.53
Ubiquitin carboxyl-terminal hydrolase isozyme L1 OS=Rattus norvegicus OX=10116 GN=Uchl1 PE=1 SV=2	UCHL1_RAT	Uchl1	19.4	16.9	11.3	13	13	8.58	19.4	22.1
V-type proton ATPase 116 kDa subunit a isoform 1 OS=Rattus norvegicus OX=10116 GN=Atp6v0a1 PE=2 SV=1	VPP1_RAT	Atp6v0a1	0.648	0.821	0.704	0.762	0.704	0.648	0.648	0.762
Polyadenylate-binding protein 1 OS=Rattus norvegicus OX=10116 GN=Pabpc1 PE=1 SV=1	PABP1_RAT	Pabpc1	1.58	1.7	1.58	2.09	1.83	1.96	1.47	2.09
Spliceosome RNA helicase Ddx39b OS=Rattus norvegicus OX=10116 GN=Ddx39b PE=2 SV=3	DX39B_RAT	Ddx39b	2.43	2.66	2.43	2.22	1.82	2.43	2.43	3.17
V-type proton ATPase subunit B, brain isoform OS=Rattus norvegicus OX=10116 GN=Atp6v1b2 PE=1 SV=1	VATB2_RAT	Atp6v1b2	3.33	2.87	3.58	4.13	2.46	5.42	1.92	3.09
Ras-related protein Rab-3B OS=Rattus norvegicus OX=10116 GN=Rab3b PE=1 SV=2	RAB3B_RAT	Rab3b	4.15	4.15	4.84	4.84	3.54	3.54	4.84	4.84
60S ribosomal protein L6 OS=Rattus norvegicus OX=10116 GN=Rpl6 PE=1 SV=5	RL6_RAT	Rpl6	3.5	3.5	2.09	3.09	2.73	3.09	2.73	4.96
WD repeat-containing protein 1 OS=Rattus norvegicus OX=10116 GN=Wdr1 PE=1 SV=3	WDR1_RAT	Wdr1	1.06	0.872	0.872	0.965	0.872	0.7	1.06	0.965
Golgin subfamily A member 4 OS=Rattus norvegicus OX=10116 GN=Golga4 PE=1 SV=2	GOGA4_RAT	Golga4	0	0.0379	0	0	0.0251	0	0.0639	0.0251
ADP/ATP translocase 1 OS=Rattus norvegicus OX=10116 GN=Slc25a4 PE=1 SV=3	ADT1_RAT	Slc25a4	8	12.2	11	9.89	12.2	6.43	8.9	8.9
Pre-mRNA-processing factor 19 OS=Rattus norvegicus OX=10116 GN=Prpf19 PE=1 SV=2	PRP19_RAT	Prpf19	0.886	1.24	1.38	2.36	0.886	1.83	1.12	1.12
DNA damage-binding protein 1 OS=Rattus norvegicus OX=10116 GN=Ddb1 PE=1 SV=1	DDB1_RAT	Ddb1	0.578	0.426	0.256	0.5	0.539	0.578	0.66	0.539
Dynein heavy chain 1, axonemal OS=Rattus norvegicus OX=10116 GN=Dnah1 PE=2 SV=2	DYH1_RAT	Dnah1	0	0	0	0.0126	0	0	0	0
cAMP-dependent protein kinase type I-alpha regulatory subunit OS=Rattus norvegicus OX=10116 GN=Prkar1a PE=1 SV=2	KAP0_RAT	Prkar1a	2.76	2.76	3.36	4.05	3.05	3.69	4.43	3.69
Heterogeneous nuclear ribonucleoprotein A1 OS=Rattus norvegicus OX=10116 GN=Hnrnpa1 PE=1 SV=3	ROA1_RAT	Hnrnpa1	9.02	9.02	9.02	5.93	5.32	6.6	9.02	8.14
Protein piccolo OS=Rattus norvegicus OX=10116 GN=Pclo PE=1 SV=1	PCLO_RAT	Pclo	0.0357	0	0.0297	0	0.0237	0	0.0177	0
Cytoplasmic aconitate hydratase OS=Rattus norvegicus OX=10116 GN=Aco1 PE=1 SV=1	ACOC_RAT	Aco1	0.744	1.05	0.744	0.923	0.987	0.923	0.744	0.802
Unconventional myosin-Va OS=Rattus norvegicus OX=10116 GN=Myo5a PE=1 SV=1	MYO5A_RAT	Myo5a	0.219	0.112	0.182	0.129	0.2	0.129	0.182	0.182
Apolipoprotein B-100 OS=Rattus norvegicus OX=10116 GN=Apob PE=1 SV=1	APOB_RAT	Apob	0	0.0121	0	0.0121	0	0	0.0121	0
T-complex protein 1 subunit delta OS=Rattus norvegicus OX=10116 GN=Cct4 PE=1 SV=3	TCPD_RAT	Cct4	2.17	2.94	1.84	2.17	3.17	2.34	2.34	1.84
Phosphatidylethanolamine-binding protein 1 OS=Rattus norvegicus OX=10116 GN=Pebp1 PE=1 SV=3	PEBP1_RAT	Pebp1	18.8	22	16.1	11.7	16.1	11.7	16.1	35
40S ribosomal protein S7 OS=Rattus norvegicus OX=10116 GN=Rps7 PE=1 SV=1	RS7_RAT	Rps7	11.6	9.93	8.5	7.25	9.93	11.6	9.93	7.25
Dynamin-1-like protein OS=Rattus norvegicus OX=10116 GN=Dnm1l PE=1 SV=1	DNM1L_RAT	Dnm1l	0.989	1.23	2.03	1.6	2.14	1.7	1.32	1.15
Transaldolase OS=Rattus norvegicus OX=10116 GN=Taldo1 PE=1 SV=2	TALDO_RAT	Taldo1	3.98	4.89	5.41	3.98	4.41	3.98	4.41	3.98
Keratin, type II cytoskeletal 8 OS=Rattus norvegicus OX=10116 GN=Krt8 PE=1 SV=3	K2C8_RAT	Krt8	2.88	3.63	2.66	3.63	2.07	3.37	2.88	1.73
Brefeldin A-inhibited guanine nucleotide-exchange protein 1 OS=Rattus norvegicus OX=10116 GN=Arfgef1 PE=1 SV=1	BIG1_RAT	Arfgef1	0.282	0.204	0.204	0.282	0.322	0.223	0.302	0.262
Ubiquitin carboxyl-terminal hydrolase 7 OS=Rattus norvegicus OX=10116 GN=Usp7 PE=1 SV=1	UBP7_RAT	Usp7	0.493	0.609	0.253	0.65	0.531	0.531	0.569	0.569
Dipeptidyl peptidase 3 OS=Rattus norvegicus OX=10116 GN=Dpp3 PE=1 SV=2	DPP3_RAT	Dpp3	0.853	1.16	1.34	1.34	1.43	1.25	1.34	1.16
Transgelin-2 OS=Rattus norvegicus OX=10116 GN=Tagln2 PE=1 SV=1	TAGL2_RAT	Tagln2	20.1	17.4	17.4	17.4	26.9	17.4	31	23.3
General vesicular transport factor p115 OS=Rattus norvegicus OX=10116 GN=Uso1 PE=1 SV=1	USO1_RAT	Uso1	0.767	1.11	0.432	0.82	1.24	1.18	1.05	0.933
Protein disulfide-isomerase A6 OS=Rattus norvegicus OX=10116 GN=Pdia6 PE=1 SV=2	PDIA6_RAT	Pdia6	1.69	1.87	2.74	2.07	2.5	2.07	2.99	2.28
Unconventional myosin-Ib OS=Rattus norvegicus OX=10116 GN=Myo1b PE=1 SV=1	MYO1B_RAT	Myo1b	0.407	0.668	0.13	0.589	0.441	0.551	0.441	0.373
AP-2 complex subunit alpha-2 OS=Rattus norvegicus OX=10116 GN=Ap2a2 PE=1 SV=3	AP2A2_RAT	Ap2a2	0.853	0.971	0.448	1.23	1.03	1.16	0.971	0.971
26S proteasome non-ATPase regulatory subunit 1 OS=Rattus norvegicus OX=10116 GN=Psmd1 PE=1 SV=1	PSMD1_RAT	Psmd1	0.484	1.14	0.237	0.78	1.34	1.01	0.577	0.484
Secretogranin-1 OS=Rattus norvegicus OX=10116 GN=Chgb PE=1 SV=2	SCG1_RAT	Chgb	1.1	0.857	0.936	1.19	1.19	0.857	1.1	1.19
Heterogeneous nuclear ribonucleoprotein H OS=Rattus norvegicus OX=10116 GN=Hnrnph1 PE=1 SV=2	HNRH1_RAT	Hnrnph1	1.47	1.32	1.47	1.47	1.47	1.47	0.908	1.64
Prohibitin-2 OS=Rattus norvegicus OX=10116 GN=Phb2 PE=1 SV=1	PHB2_RAT	Phb2	6.29	4.49	3.99	4.49	1.57	2.76	6.29	4.49
Ras-related protein Rab-2A OS=Rattus norvegicus OX=10116 GN=Rab2a PE=2 SV=1	RAB2A_RAT	Rab2a	5.38	4.59	5.38	6.29	6.29	3.9	5.38	3.9
Major vault protein OS=Rattus norvegicus OX=10116 GN=Mvp PE=1 SV=4	MVP_RAT	Mvp	1.09	1.09	0.494	0.708	0.953	0.888	0.766	1.16
Histone H2A type 2-A OS=Rattus norvegicus OX=10116 GN=Hist2h2aa3 PE=1 SV=1	H2A2A_RAT	Hist2h2aa3	7.64	7.64	15.5	19.5	12.3	9.72	7.64	9.72
MAP kinase-activating death domain protein OS=Rattus norvegicus OX=10116 GN=Madd PE=1 SV=1	MADD_RAT	Madd	0.36	0.336	0.41	0.36	0.336	0.198	0.462	0.385
40S ribosomal protein S2 OS=Rattus norvegicus OX=10116 GN=Rps2 PE=1 SV=1	RS2_RAT	Rps2	3.1	3.1	2.03	2.71	2.03	2.71	2.71	2.71
E3 ubiquitin-protein ligase UBR5 OS=Rattus norvegicus OX=10116 GN=Ubr5 PE=1 SV=3	UBR5_RAT	Ubr5	0.158	0.122	0.183	0.0875	0.17	0.0212	0.0989	0.122
STE20-like serine/threonine-protein kinase OS=Rattus norvegicus OX=10116 GN=Slk PE=1 SV=1	SLK_RAT	Slk	0.354	0.487	0.386	0.487	0.386	0.354	0.632	0.354
Spectrin beta chain, non-erythrocytic 2 OS=Rattus norvegicus OX=10116 GN=Sptbn2 PE=1 SV=2	SPTN2_RAT	Sptbn2	0.0869	0.0488	0.0488	0.074	0.0613	0.0613	0.0869	0.0613
Carboxypeptidase E OS=Rattus norvegicus OX=10116 GN=Cpe PE=1 SV=1	CBPE_RAT	Cpe	0.929	1.76	1.45	1.31	1.6	2.72	1.6	2.11
Neurofibromin OS=Rattus norvegicus OX=10116 GN=Nf1 PE=1 SV=1	NF1_RAT	Nf1	0.0959	0.0522	0.107	0.118	0.141	0.107	0.107	0.063
Endoplasmic reticulum aminopeptidase 1 OS=Rattus norvegicus OX=10116 GN=Erap1 PE=2 SV=2	ERAP1_RAT	Erap1	0.436	0.352	0.48	0.48	0.62	0.436	0.436	0.312
ATP-dependent RNA helicase DDX1 OS=Rattus norvegicus OX=10116 GN=Ddx1 PE=1 SV=1	DDX1_RAT	Ddx1	1.17	0.86	1.35	0.656	1.26	0.79	1.01	0.593
Phosphatidylinositol 4-kinase alpha OS=Rattus norvegicus OX=10116 GN=Pi4ka PE=1 SV=2	PI4KA_RAT	Pi4ka	0.177	0.177	0.13	0.146	0.21	0.115	0.177	0.146
Nucleolar RNA helicase 2 OS=Rattus norvegicus OX=10116 GN=Ddx21 PE=2 SV=1	DDX21_RAT	Ddx21	0.623	0.685	0.623	0.685	0.815	0.452	0.749	0.749
Nuclear pore membrane glycoprotein 210 OS=Rattus norvegicus OX=10116 GN=Nup210 PE=1 SV=1	PO210_RAT	Nup210	0.247	0.329	0.329	0.228	0.308	0.209	0.209	0.171
Keratin, type I cytoskeletal 18 OS=Rattus norvegicus OX=10116 GN=Krt18 PE=1 SV=3	K1C18_RAT	Krt18	1.37	3.32	2.31	2.31	2.1	2.31	1.9	2.31
Eukaryotic initiation factor 4A-III OS=Rattus norvegicus OX=10116 GN=Eif4a3 PE=1 SV=1	IF4A3_RAT	Eif4a3	1.76	2.88	1.76	2.62	1.76	2.62	2.88	2.62
Alpha-internexin OS=Rattus norvegicus OX=10116 GN=Ina PE=1 SV=2	AINX_RAT	Ina	2.3	2.49	2.3	2.91	3.91	3.14	2.3	2.49
Coatomer subunit gamma-1 OS=Rattus norvegicus OX=10116 GN=Copg1 PE=2 SV=1	COPG1_RAT	Copg1	0.637	0.584	0.929	0.584	1.2	0.806	0.748	0.867
GRIP and coiled-coil domain-containing protein 2 OS=Rattus norvegicus OX=10116 GN=Gcc2 PE=1 SV=1	GCC2_RAT	Gcc2	0.0508	0.0336	0.0861	0.0336	0.0508	0.0508	0.0508	0.104
Citrate synthase, mitochondrial OS=Rattus norvegicus OX=10116 GN=Cs PE=1 SV=1	CISY_RAT	Cs	0.964	1.09	2.02	1.51	1.67	1.67	2.41	2.02
Peroxiredoxin-1 OS=Rattus norvegicus OX=10116 GN=Prdx1 PE=1 SV=1	PRDX1_RAT	Prdx1	7.25	9.93	9.93	5.23	7.25	4.41	8.5	5.23
Histone H1.1 OS=Rattus norvegicus OX=10116 GN=Hist1h1a PE=1 SV=1	H11_RAT	Hist1h1a	5.28	5.28	4.46	7.34	3.11	5.28	5.28	6.24
Calcium/calmodulin-dependent protein kinase type II subunit beta OS=Rattus norvegicus OX=10116 GN=Camk2b PE=1 SV=1	KCC2B_RAT	Camk2b	0.608	1.09	1.21	1.09	1.09	0.884	0.884	0.986
Amine oxidase [flavin-containing] B OS=Rattus norvegicus OX=10116 GN=Maob PE=1 SV=3	AOFB_RAT	Maob	0.925	1.39	1.39	1.39	1.27	2.32	1.27	0.925
Alpha-centractin OS=Rattus norvegicus OX=10116 GN=Actr1a PE=1 SV=1	ACTZ_RAT	Actr1a	1.44	2.54	2.28	2.28	1.83	2.28	3.76	3.42
Dynamin-2 OS=Rattus norvegicus OX=10116 GN=Dnm2 PE=1 SV=1	DYN2_RAT	Dnm2	0.743	0.986	0.386	0.986	0.8	0.986	0.8	0.632
Rho GDP-dissociation inhibitor 1 OS=Rattus norvegicus OX=10116 GN=Arhgdia PE=1 SV=1	GDIR1_RAT	Arhgdia	8.59	3.93	5.44	7.4	3.93	7.4	4.63	11.5
Transcription activator BRG1 OS=Rattus norvegicus OX=10116 GN=Smarca4 PE=1 SV=1	SMCA4_RAT	Smarca4	0.377	0.377	0.377	0.26	0.377	0.216	0.282	0.352
Sister chromatid cohesion protein PDS5 homolog A OS=Rattus norvegicus OX=10116 GN=Pds5a PE=1 SV=1	PDS5A_RAT	Pds5a	0.293	0.137	0.213	0.266	0.266	0.162	0.137	0.213
Carboxypeptidase D OS=Rattus norvegicus OX=10116 GN=Cpd PE=1 SV=2	CBPD_RAT	Cpd	0.315	0.372	0.343	0.343	0.401	0.343	0.343	0.343
60S ribosomal protein L4 OS=Rattus norvegicus OX=10116 GN=Rpl4 PE=1 SV=3	RL4_RAT	Rpl4	1.57	1.57	1.57	1.93	1.93	1.74	1.1	0.96
Tripeptidyl-peptidase 2 OS=Rattus norvegicus OX=10116 GN=Tpp2 PE=2 SV=3	TPP2_RAT	Tpp2	0.451	0.233	0.205	0.353	0.592	0.417	0.556	0.233
DNA repair protein RAD50 OS=Rattus norvegicus OX=10116 GN=Rad50 PE=1 SV=1	RAD50_RAT	Rad50	0.182	0.158	0.134	0.207	0.182	0.0648	0.0873	0.0427
Synaptic vesicle membrane protein VAT-1 homolog OS=Rattus norvegicus OX=10116 GN=Vat1 PE=1 SV=1	VAT1_RAT	Vat1	1.6	1.8	1.6	1.8	2.02	1.8	1.8	1.8
Glutathione S-transferase Yb-3 OS=Rattus norvegicus OX=10116 GN=Gstm3 PE=1 SV=2	GSTM4_RAT	Gstm3	17.6	6.94	10.4	6.94	11.9	6.94	9.13	15.5
Histone H1.4 OS=Rattus norvegicus OX=10116 GN=Hist1h1e PE=1 SV=3	H14_RAT	Hist1h1e	5.28	10.1	3.11	6.24	3.74	5.28	5.28	8.6
Tropomyosin alpha-3 chain OS=Rattus norvegicus OX=10116 GN=Tpm3 PE=1 SV=2	TPM3_RAT	Tpm3	5.3	7.72	6.83	7.72	4.66	4.08	6.83	6.02
Serine/threonine-protein kinase MRCK beta OS=Rattus norvegicus OX=10116 GN=Cdc42bpb PE=1 SV=1	MRCKB_RAT	Cdc42bpb	0.16	0.26	0.18	0.16	0.281	0.16	0.219	0.141
NADH-cytochrome b5 reductase 3 OS=Rattus norvegicus OX=10116 GN=Cyb5r3 PE=1 SV=2	NB5R3_RAT	Cyb5r3	5.32	3.79	2.99	4.26	1.51	2.99	5.32	4.26
Isocitrate dehydrogenase [NADP], mitochondrial OS=Rattus norvegicus OX=10116 GN=Idh2 PE=1 SV=2	IDHP_RAT	Idh2	1.25	2.48	2.27	2.48	1.89	2.27	1.89	2.07
AMP deaminase 2 OS=Rattus norvegicus OX=10116 GN=Ampd2 PE=1 SV=2	AMPD2_RAT	Ampd2	0.606	0.606	0.661	0.501	0.501	0.606	0.451	0.501
NADH-ubiquinone oxidoreductase 75 kDa subunit, mitochondrial OS=Rattus norvegicus OX=10116 GN=Ndufs1 PE=1 SV=1	NDUS1_RAT	Ndufs1	1.24	1.15	1.33	1.33	1.15	1.33	1.53	0.906
40S ribosomal protein S15 OS=Rattus norvegicus OX=10116 GN=Rps15 PE=1 SV=2	RS15_RAT	Rps15	5.1	11.6	14.1	11.6	14.1	9.5	11.6	7.76
E3 ubiquitin-protein ligase TRIP12 OS=Rattus norvegicus OX=10116 GN=Trip12 PE=1 SV=1	TRIPC_RAT	Trip12	0.138	0.189	0.138	0.172	0.138	0.106	0.155	0.122
Large proline-rich protein BAG6 OS=Rattus norvegicus OX=10116 GN=Bag6 PE=1 SV=2	BAG6_RAT	Bag6	0.754	0.619	0.494	0.494	0.534	0.416	0.416	0.342
tRNA-splicing ligase RtcB homolog OS=Rattus norvegicus OX=10116 GN=Rtcb PE=2 SV=1	RTCB_RAT	Rtcb	0.998	1.99	1.67	2.56	3.23	1.83	1.52	1.83
ELAV-like protein 1 OS=Rattus norvegicus OX=10116 GN=Elavl1 PE=1 SV=1	ELAV1_RAT	Elavl1	2.7	3.81	4.72	3.04	4.72	4.24	5.24	3.81
Inositol-3-phosphate synthase 1 OS=Rattus norvegicus OX=10116 GN=Isyna1 PE=3 SV=2	INO1_RAT	Isyna1	0.689	0.78	0.78	0.78	0.976	0.976	0.78	0.689
Asparagine synthetase [glutamine-hydrolyzing] OS=Rattus norvegicus OX=10116 GN=Asns PE=2 SV=3	ASNS_RAT	Asns	0.816	1.45	1.57	1.57	1.01	1.22	0.909	0.816
High mobility group protein B1 OS=Rattus norvegicus OX=10116 GN=Hmgb1 PE=1 SV=2	HMGB1_RAT	Hmgb1	7.45	9.86	11.3	6.45	11.3	9.86	13	22.1
Voltage-dependent anion-selective channel protein 3 OS=Rattus norvegicus OX=10116 GN=Vdac3 PE=1 SV=2	VDAC3_RAT	Vdac3	1.78	1.27	1.27	1.51	1.51	1.27	1.51	1.27
40S ribosomal protein S4, X isoform OS=Rattus norvegicus OX=10116 GN=Rps4x PE=2 SV=2	RS4X_RAT	Rps4x	3.93	3.43	3.93	5.78	2.58	3.43	3.93	5.78
Interleukin enhancer-binding factor 3 OS=Rattus norvegicus OX=10116 GN=Ilf3 PE=1 SV=2	ILF3_RAT	Ilf3	0.597	0.765	0.493	0.825	0.597	0.544	0.707	0.444
Receptor of activated protein C kinase 1 OS=Rattus norvegicus OX=10116 GN=Rack1 PE=1 SV=3	RACK1_RAT	Rack1	1.69	1.69	1.69	1.46	0.876	1.25	1.94	1.94
60S ribosomal protein L15 OS=Rattus norvegicus OX=10116 GN=Rpl15 PE=1 SV=2	RL15_RAT	Rpl15	2.65	2.21	2.21	3.15	2.21	2.21	1.82	2.65
Adenosylhomocysteinase OS=Rattus norvegicus OX=10116 GN=Ahcy PE=1 SV=3	SAHH_RAT	Ahcy	0.951	2.11	1.72	2.11	1.23	1.72	1.55	2.56
Neuroendocrine convertase 2 OS=Rattus norvegicus OX=10116 GN=Pcsk2 PE=1 SV=1	NEC2_RAT	Pcsk2	0.644	0.644	0.799	0.799	1.83	1.36	1.36	0.571
Probable ATP-dependent RNA helicase DDX46 OS=Rattus norvegicus OX=10116 GN=Ddx46 PE=1 SV=1	DDX46_RAT	Ddx46	0.351	0.389	0.427	0.508	0.508	0.427	0.549	0.427
cAMP-dependent protein kinase catalytic subunit beta OS=Rattus norvegicus OX=10116 GN=Prkacb PE=1 SV=2	KAPCB_RAT	Prkacb	3.38	1.97	1.54	2.75	1.97	3.05	2.21	1.75
Succinate dehydrogenase [ubiquinone] flavoprotein subunit, mitochondrial OS=Rattus norvegicus OX=10116 GN=Sdha PE=1 SV=1	SDHA_RAT	Sdha	1.33	1.14	1.14	1.04	1.23	0.953	0.708	0.634
Glycogen phosphorylase, brain form (Fragment) OS=Rattus norvegicus OX=10116 GN=Pygb PE=1 SV=3	PYGB_RAT	Pygb	0.306	0.649	0.705	0.649	0.884	0.649	0.595	0.705
Ras-related protein Rab-14 OS=Rattus norvegicus OX=10116 GN=Rab14 PE=1 SV=3	RAB14_RAT	Rab14	6.09	6.09	3.21	4.46	7.08	4.46	6.09	11
Protein strawberry notch homolog 1 OS=Rattus norvegicus OX=10116 GN=Sbno1 PE=1 SV=2	SBNO1_RAT	Sbno1	0.316	0.316	0.228	0.286	0.257	0.257	0.121	0.147
DNA topoisomerase 1 OS=Rattus norvegicus OX=10116 GN=Top1 PE=1 SV=1	TOP1_RAT	Top1	0.528	0.889	0.424	0.583	0.475	0.64	0.583	0.528
Ankyrin-3 OS=Rattus norvegicus OX=10116 GN=Ank3 PE=1 SV=3	ANK3_RAT	Ank3	0.095	0.0827	0.0827	0.107	0.107	0.0704	0.0827	0.095
Tight junction protein ZO-1 OS=Rattus norvegicus OX=10116 GN=Tjp1 PE=1 SV=1	ZO1_RAT	Tjp1	0.278	0.364	0.237	0.299	0.278	0.217	0.237	0.217
ATP synthase subunit d, mitochondrial OS=Rattus norvegicus OX=10116 GN=Atp5h PE=1 SV=3	ATP5H_RAT	Atp5h	18.3	15.4	5.11	7.49	15.4	10.8	18.3	9.01
ATP synthase subunit gamma, mitochondrial OS=Rattus norvegicus OX=10116 GN=Atp5f1c PE=1 SV=2	ATPG_RAT	Atp5f1c	3.76	4.86	3.76	4.86	3.29	3.76	4.28	3.76
Nuclear autoantigenic sperm protein OS=Rattus norvegicus OX=10116 GN=Nasp PE=1 SV=1	NASP_RAT	Nasp	0.463	0.703	0.463	0.703	0.769	0.64	0.703	0.579
Mitochondrial 2-oxoglutarate/malate carrier protein OS=Rattus norvegicus OX=10116 GN=Slc25a11 PE=1 SV=3	M2OM_RAT	Slc25a11	2.99	3.37	2.64	2.99	2.32	2.99	2.32	2.64
Insulin-degrading enzyme OS=Rattus norvegicus OX=10116 GN=Ide PE=1 SV=1	IDE_RAT	Ide	0.465	0.35	0.146	0.634	0.465	0.547	0.465	0.506
Pyridoxal kinase OS=Rattus norvegicus OX=10116 GN=Pdxk PE=1 SV=1	PDXK_RAT	Pdxk	5.11	4.58	3.66	5.11	4.58	5.11	5.11	2.88
40S ribosomal protein S3a OS=Rattus norvegicus OX=10116 GN=Rps3a PE=1 SV=2	RS3A_RAT	Rps3a	2.52	3.82	1.85	3.34	1.08	1.57	2.52	1.57
Serine/threonine-protein kinase mTOR OS=Rattus norvegicus OX=10116 GN=Mtor PE=1 SV=1	MTOR_RAT	Mtor	0.0935	0.118	0.0814	0.118	0.196	0.0341	0.118	0.0457
Cullin-associated NEDD8-dissociated protein 2 OS=Rattus norvegicus OX=10116 GN=Cand2 PE=1 SV=1	CAND2_RAT	Cand2	0.549	0.585	0.259	0.738	0.819	0.995	0.622	0.585
ATP synthase F(0) complex subunit B1, mitochondrial OS=Rattus norvegicus OX=10116 GN=Atp5f1 PE=1 SV=1	AT5F1_RAT	Atp5f1	4.69	1.97	1.66	1.66	2.69	2.69	1.97	2.69
Profilin-1 OS=Rattus norvegicus OX=10116 GN=Pfn1 PE=1 SV=2	PROF1_RAT	Pfn1	20.2	10.5	16.3	6.66	13.1	13.1	13.1	16.3
ATP synthase subunit O, mitochondrial OS=Rattus norvegicus OX=10116 GN=Atp5o PE=1 SV=1	ATPO_RAT	Atp5o	7.4	6.35	3.93	7.4	5.44	7.4	8.59	7.4
Heat shock protein 105 kDa OS=Rattus norvegicus OX=10116 GN=Hsph1 PE=1 SV=1	HS105_RAT	Hsph1	0.703	0.541	0.305	0.593	0.647	0.703	0.442	0.395
Unconventional myosin-Id OS=Rattus norvegicus OX=10116 GN=Myo1d PE=1 SV=3	MYO1D_RAT	Myo1d	0.356	0.557	0.148	0.433	0.283	0.283	0.283	0.356
Aspartate--tRNA ligase, cytoplasmic OS=Rattus norvegicus OX=10116 GN=Dars PE=1 SV=1	SYDC_RAT	Dars	0.322	0.954	0.748	0.748	0.398	0.848	0.478	0.848
Ras-related protein Rab-1B OS=Rattus norvegicus OX=10116 GN=Rab1b PE=1 SV=1	RAB1B_RAT	Rab1b	13.3	15.5	9.81	15.5	13.3	11.4	8.4	17.9
Drebrin OS=Rattus norvegicus OX=10116 GN=Dbn1 PE=1 SV=3	DREB_RAT	Dbn1	0.641	1.19	0.45	1.19	0.936	1.1	0.857	0.936
14-3-3 protein beta/alpha OS=Rattus norvegicus OX=10116 GN=Ywhab PE=1 SV=3	1433B_RAT	Ywhab	19.4	21.8	24.4	21.8	24.4	21.8	19.4	15.3
Heterochromatin protein 1-binding protein 3 OS=Rattus norvegicus OX=10116 GN=Hp1bp3 PE=1 SV=1	HP1B3_RAT	Hp1bp3	0.782	0.782	0.878	0.69	1.57	1.09	0.878	0.69
Microtubule-associated protein 4 OS=Rattus norvegicus OX=10116 GN=Map4 PE=1 SV=1	MAP4_RAT	Map4	0.593	0.689	0.46	0.46	0.64	0.418	0.46	0.503
UMP-CMP kinase OS=Rattus norvegicus OX=10116 GN=Cmpk1 PE=1 SV=2	KCY_RAT	Cmpk1	11.4	6.1	3.06	5.17	6.1	5.17	6.1	4.37
Destrin OS=Rattus norvegicus OX=10116 GN=Dstn PE=1 SV=3	DEST_RAT	Dstn	11.1	9.27	15.9	9.27	19	7.7	13.3	11.1
Nucleolar and coiled-body phosphoprotein 1 OS=Rattus norvegicus OX=10116 GN=Nolc1 PE=1 SV=2	NOLC1_RAT	Nolc1	0.19	0.356	0.243	0.19	0.19	0.298	0.139	0.243
Prohibitin OS=Rattus norvegicus OX=10116 GN=Phb PE=1 SV=1	PHB_RAT	Phb	4.41	6.43	2.94	5.01	5.01	3.87	4.41	7.26
Ras-related protein Rab-7a OS=Rattus norvegicus OX=10116 GN=Rab7a PE=1 SV=2	RAB7A_RAT	Rab7a	11.4	6.29	9.84	9.84	7.32	9.84	8.49	11.4
Proliferation-associated protein 2G4 OS=Rattus norvegicus OX=10116 GN=Pa2g4 PE=1 SV=1	PA2G4_RAT	Pa2g4	1.77	2.2	2.2	1.57	1.57	1.97	3.95	1.77
Solute carrier family 2, facilitated glucose transporter member 2 OS=Rattus norvegicus OX=10116 GN=Slc2a2 PE=2 SV=1	GTR2_RAT	Slc2a2	0.653	0.653	0.748	0.653	0.653	0.653	0.563	0.748
Tubulin beta-4B chain OS=Rattus norvegicus OX=10116 GN=Tubb4b PE=1 SV=1	TBB4B_RAT	Tubb4b	26.7	21.9	28.6	20.5	28.6	21.9	23.4	14.6
Thioredoxin reductase 1, cytoplasmic OS=Rattus norvegicus OX=10116 GN=Txnrd1 PE=1 SV=5	TRXR1_RAT	Txnrd1	1.4	1.4	1.85	1.85	1.85	2.03	1.26	1.13
Lon protease homolog, mitochondrial OS=Rattus norvegicus OX=10116 GN=Lonp1 PE=2 SV=1	LONM_RAT	Lonp1	0.625	0.577	0.275	0.625	0.95	0.835	0.625	0.675
Heterogeneous nuclear ribonucleoprotein A3 OS=Rattus norvegicus OX=10116 GN=Hnrnpa3 PE=1 SV=1	ROA3_RAT	Hnrnpa3	2.88	2.31	2.88	2.88	2.06	2.31	2.88	2.31
Thioredoxin-like protein 1 OS=Rattus norvegicus OX=10116 GN=Txnl1 PE=1 SV=3	TXNL1_RAT	Txnl1	2.93	3.33	3.33	3.78	1.93	3.33	3.33	5.41
ATP-dependent 6-phosphofructokinase, liver type OS=Rattus norvegicus OX=10116 GN=Pfkl PE=1 SV=3	PFKAL_RAT	Pfkl	0.692	0.511	0.569	0.511	0.629	0.756	0.456	0.35
60S ribosomal protein L7a OS=Rattus norvegicus OX=10116 GN=Rpl7a PE=1 SV=2	RL7A_RAT	Rpl7a	1.57	1.57	1.85	3.34	2.17	1.85	3.82	3.82
Heterogeneous nuclear ribonucleoprotein F OS=Rattus norvegicus OX=10116 GN=Hnrnpf PE=1 SV=3	HNRPF_RAT	Hnrnpf	1.46	2.49	2.03	1.83	2.03	1.64	1.3	2.49
Very long-chain specific acyl-CoA dehydrogenase, mitochondrial OS=Rattus norvegicus OX=10116 GN=Acadvl PE=1 SV=1	ACADV_RAT	Acadvl	1.06	1.16	1.16	1.58	1.47	1.36	0.72	0.799
Dolichyl-diphosphooligosaccharide--protein glycosyltransferase 48 kDa subunit OS=Rattus norvegicus OX=10116 GN=Ddost PE=2 SV=1	OST48_RAT	Ddost	0.796	1.05	1.05	1.18	0.916	0.916	1.18	1.18
Tyrosine--tRNA ligase, cytoplasmic OS=Rattus norvegicus OX=10116 GN=Yars PE=2 SV=3	SYYC_RAT	Yars	0.54	0.81	0.625	0.911	0.715	0.54	0.459	0.459
NADP-dependent malic enzyme OS=Rattus norvegicus OX=10116 GN=Me1 PE=1 SV=2	MAOX_RAT	Me1	0.913	1.11	1.45	1.45	1.34	1.34	0.913	1.11
Arginine--tRNA ligase, cytoplasmic OS=Rattus norvegicus OX=10116 GN=Rars PE=1 SV=2	SYRC_RAT	Rars	0.659	1.05	0.73	0.805	0.659	0.73	0.882	0.73
26S proteasome regulatory subunit 8 OS=Rattus norvegicus OX=10116 GN=Psmc5 PE=1 SV=1	PRS8_RAT	Psmc5	0.87	1.3	1.15	1.65	1.15	0.87	1.47	1.84
Cytochrome b-c1 complex subunit 2, mitochondrial OS=Rattus norvegicus OX=10116 GN=Uqcrc2 PE=1 SV=2	QCR2_RAT	Uqcrc2	0.928	1.86	2.48	2.48	1.68	1.86	2.05	1.86
Glutaredoxin-3 OS=Rattus norvegicus OX=10116 GN=Glrx3 PE=1 SV=2	GLRX3_RAT	Glrx3	1.72	1.3	1.5	0.95	0.95	1.12	1.72	1.96
Cytoplasmic dynein 2 heavy chain 1 OS=Rattus norvegicus OX=10116 GN=Dync2h1 PE=1 SV=1	DYHC2_RAT	Dync2h1	0.0132	0	0.0132	0	0	0	0.0199	0
60S ribosomal protein L13 OS=Rattus norvegicus OX=10116 GN=Rpl13 PE=1 SV=2	RL13_RAT	Rpl13	2.17	3.66	1.46	1.79	2.17	2.17	2.17	3.1
Activity-dependent neuroprotector homeobox protein OS=Rattus norvegicus OX=10116 GN=Adnp PE=1 SV=2	ADNP_RAT	Adnp	0.477	0.264	0.264	0.2	0.2	0.139	0.2	0.169
Elongation factor 1-delta OS=Rattus norvegicus OX=10116 GN=Eef1d PE=1 SV=2	EF1D_RAT	Eef1d	2.69	3.51	2.69	2.69	2.02	1.73	2.69	2.34
Farnesyl pyrophosphate synthase OS=Rattus norvegicus OX=10116 GN=Fdps PE=2 SV=2	FPPS_RAT	Fdps	1.74	3.03	2.45	1.96	1.96	2.2	2.45	1.35
Platelet-activating factor acetylhydrolase IB subunit alpha OS=Rattus norvegicus OX=10116 GN=Pafah1b1 PE=1 SV=2	LIS1_RAT	Pafah1b1	0.405	0.724	0.146	0.61	1.11	0.504	0.504	0.405
Carbonyl reductase [NADPH] 1 OS=Rattus norvegicus OX=10116 GN=Cbr1 PE=1 SV=2	CBR1_RAT	Cbr1	4.75	5.38	4.75	7.69	5.38	4.19	4.19	6.84
Coatomer subunit delta OS=Rattus norvegicus OX=10116 GN=Arcn1 PE=2 SV=1	COPD_RAT	Arcn1	0.951	1.18	0.951	1.18	1.31	1.31	0.951	1.18
26S proteasome regulatory subunit 6B OS=Rattus norvegicus OX=10116 GN=Psmc4 PE=1 SV=1	PRS6B_RAT	Psmc4	1.09	2.34	1.23	1.23	0.954	1.73	1.39	1.09
Vitamin D-binding protein OS=Rattus norvegicus OX=10116 GN=Gc PE=1 SV=3	VTDB_RAT	Gc	0.346	0.429	0.346	0.609	0.516	0.609	0.609	0.346
3-hydroxyacyl-CoA dehydrogenase type-2 OS=Rattus norvegicus OX=10116 GN=Hsd17b10 PE=1 SV=3	HCD2_RAT	Hsd17b10	6.94	2.55	3.47	6.94	4.62	4.01	10.2	6.08
40S ribosomal protein S9 OS=Rattus norvegicus OX=10116 GN=Rps9 PE=1 SV=4	RS9_RAT	Rps9	8.1	3.56	5.02	2.98	5.02	4.24	4.24	2.02
Elongator complex protein 1 OS=Rattus norvegicus OX=10116 GN=Elp1 PE=2 SV=1	ELP1_RAT	Elp1	0.474	0.382	0.241	0.295	0.382	0.163	0.268	0.188
Poly [ADP-ribose] polymerase 1 OS=Rattus norvegicus OX=10116 GN=Parp1 PE=1 SV=4	PARP1_RAT	Parp1	0.221	0.221	0.121	0.33	0.449	0.256	0.33	0.187
Scaffold attachment factor B1 OS=Rattus norvegicus OX=10116 GN=Safb PE=1 SV=2	SAFB1_RAT	Safb	0.359	0.24	0.202	0.278	0.278	0.24	0.278	0.24
Heterogeneous nuclear ribonucleoprotein D0 OS=Rattus norvegicus OX=10116 GN=Hnrnpd PE=1 SV=2	HNRPD_RAT	Hnrnpd	1.49	4.23	3.82	2.76	1.93	2.19	3.08	1.11
DNA mismatch repair protein Msh2 OS=Rattus norvegicus OX=10116 GN=Msh2 PE=2 SV=1	MSH2_RAT	Msh2	0.32	0.361	0.131	0.448	0.448	0.361	0.54	0.361
60S acidic ribosomal protein P0 OS=Rattus norvegicus OX=10116 GN=Rplp0 PE=1 SV=2	RLA0_RAT	Rplp0	1.51	0.907	0.907	1.09	1.29	0.739	1.29	1.29
Brefeldin A-inhibited guanine nucleotide-exchange protein 2 OS=Rattus norvegicus OX=10116 GN=Arfgef2 PE=1 SV=1	BIG2_RAT	Arfgef2	0.211	0.231	0.136	0.192	0.333	0.173	0.154	0.136
Ryanodine receptor 2 OS=Rattus norvegicus OX=10116 GN=Ryr2 PE=1 SV=2	RYR2_RAT	Ryr2	0.0116	0	0	0	0	0.0116	0	0
Xin actin-binding repeat-containing protein 2 OS=Rattus norvegicus OX=10116 GN=Xirp2 PE=1 SV=1	XIRP2_RAT	Xirp2	0	0	0	0	0	0	0.0174	0
Transferrin receptor protein 1 (Fragment) OS=Rattus norvegicus OX=10116 GN=Tfrc PE=1 SV=1	TFR1_RAT	Tfrc	0.439	0.807	0.577	1.17	0.506	0.98	0.727	0.439
CAP-Gly domain-containing linker protein 1 OS=Rattus norvegicus OX=10116 GN=Clip1 PE=1 SV=2	CLIP1_RAT	Clip1	0.115	0.164	0.115	0.0444	0.0444	0.0444	0.0444	0.0673
Triple functional domain protein OS=Rattus norvegicus OX=10116 GN=Trio PE=1 SV=4	TRIO_RAT	Trio	0.0187	0	0.0282	0	0.0187	0	0.0187	0
Annexin A5 OS=Rattus norvegicus OX=10116 GN=Anxa5 PE=1 SV=3	ANXA5_RAT	Anxa5	3.49	3.11	1.42	2.44	2.15	2.44	3.9	3.11
DNA (cytosine-5)-methyltransferase 3A OS=Rattus norvegicus OX=10116 GN=Dnmt3a PE=1 SV=1	DNM3A_RAT	Dnmt3a	0.415	0.415	0.287	0.461	0.765	0.556	0.507	0.415
Alanine--tRNA ligase, cytoplasmic OS=Rattus norvegicus OX=10116 GN=Aars PE=1 SV=3	SYAC_RAT	Aars	0.272	0.198	0.128	0.311	0.234	0.392	0.478	0.392
Thyroid hormone receptor-associated protein 3 OS=Rattus norvegicus OX=10116 GN=Thrap3 PE=1 SV=1	TR150_RAT	Thrap3	0.268	0.268	0.195	0.47	0.655	0.56	0.427	0.345
V-type proton ATPase subunit E 1 OS=Rattus norvegicus OX=10116 GN=Atp6v1e1 PE=1 SV=1	VATE1_RAT	Atp6v1e1	4.36	4.36	2.74	3.75	2.74	1.61	2.74	3.21
Vesicle-fusing ATPase OS=Rattus norvegicus OX=10116 GN=Nsf PE=1 SV=1	NSF_RAT	Nsf	0.473	0.532	0.532	0.655	0.859	0.859	0.363	0.363
40S ribosomal protein SA OS=Rattus norvegicus OX=10116 GN=Rpsa PE=1 SV=3	RSSA_RAT	Rpsa	5.18	3.63	3.21	5.18	2.16	3.21	6.48	5.8
Isocitrate dehydrogenase [NAD] subunit alpha, mitochondrial OS=Rattus norvegicus OX=10116 GN=Idh3a PE=1 SV=1	IDH3A_RAT	Idh3a	1.82	2.06	2.06	1.61	2.88	2.31	2.88	1.05
Kinesin-like protein KIF15 OS=Rattus norvegicus OX=10116 GN=Kif15 PE=2 SV=1	KIF15_RAT	Kif15	0.0412	0	0	0.0624	0.0624	0	0	0
Cofilin-1 OS=Rattus norvegicus OX=10116 GN=Cfl1 PE=1 SV=3	COF1_RAT	Cfl1	5.24	5.24	6.37	3.47	3.47	3.47	7.7	5.24
Eukaryotic translation initiation factor 5B OS=Rattus norvegicus OX=10116 GN=Eif5b PE=1 SV=1	IF2P_RAT	Eif5b	0.178	0.293	0.293	0.293	0.419	0.15	0.15	0.0726
Programmed cell death 6-interacting protein OS=Rattus norvegicus OX=10116 GN=Pdcd6ip PE=1 SV=2	PDC6I_RAT	Pdcd6ip	0.394	0.489	0.348	0.54	0.489	0.441	0.262	0.304
40S ribosomal protein S10 OS=Rattus norvegicus OX=10116 GN=Rps10 PE=2 SV=1	RS10_RAT	Rps10	7.39	4.13	2.14	3.36	4.13	5.05	4.13	2.7
Heat shock protein 75 kDa, mitochondrial OS=Rattus norvegicus OX=10116 GN=Trap1 PE=1 SV=1	TRAP1_RAT	Trap1	1.05	0.817	0.968	0.968	1.6	1.22	1.13	0.746
Neural cell adhesion molecule 1 OS=Rattus norvegicus OX=10116 GN=Ncam1 PE=1 SV=1	NCAM1_RAT	Ncam1	0.607	0.403	0.357	0.554	0.502	0.452	0.311	0.357
Ras-related protein Rap-1b OS=Rattus norvegicus OX=10116 GN=Rap1b PE=1 SV=2	RAP1B_RAT	Rap1b	9.91	5.97	7.09	5.97	7.09	7.09	8.4	11.7
Keratin, type I cytoskeletal 10 OS=Rattus norvegicus OX=10116 GN=Krt10 PE=3 SV=1	K1C10_RAT	Krt10	1.33	0.484	0.402	0.57	1.33	1.33	0.859	0.757
Phospholipase D3 OS=Rattus norvegicus OX=10116 GN=Pld3 PE=1 SV=1	PLD3_RAT	Pld3	0.597	0.597	0.597	0.693	0.506	0.597	0.795	0.795
FERM, ARHGEF and pleckstrin domain-containing protein 1 OS=Rattus norvegicus OX=10116 GN=Farp1 PE=1 SV=2	FARP1_RAT	Farp1	0.176	0.241	0.114	0.208	0.208	0.176	0.145	0.114
Activating signal cointegrator 1 complex subunit 3 OS=Rattus norvegicus OX=10116 GN=Ascc3 PE=3 SV=1	ASCC3_RAT	Ascc3	0.0529	0.0666	0.0804	0.0394	0.0944	0.0804	0.0804	0.0529
Eukaryotic translation initiation factor 5A-1 OS=Rattus norvegicus OX=10116 GN=Eif5a PE=1 SV=3	IF5A1_RAT	Eif5a	17.4	6.4	9.65	9.65	11.8	14.3	9.65	11.8
Elongation factor Tu, mitochondrial OS=Rattus norvegicus OX=10116 GN=Tufm PE=1 SV=1	EFTU_RAT	Tufm	0.47	1.3	0.9	1.46	0.9	1.46	0.671	1.62
Peptidyl-prolyl cis-trans isomerase FKBP4 OS=Rattus norvegicus OX=10116 GN=Fkbp4 PE=1 SV=3	FKBP4_RAT	Fkbp4	1.1	1.53	1.53	1.69	1.23	1.53	1.23	1.1
Mannosyl-oligosaccharide glucosidase OS=Rattus norvegicus OX=10116 GN=Mogs PE=1 SV=1	MOGS_RAT	Mogs	0.233	0.418	0.63	0.468	0.322	0.52	0.468	0.418
Histone H3.1 OS=Rattus norvegicus OX=10116 PE=1 SV=3	H31_RAT		1.69	1.21	1.21	0	0.812	0	1.21	0
Alcohol dehydrogenase [NADP(+)] OS=Rattus norvegicus OX=10116 GN=Akr1a1 PE=1 SV=2	AK1A1_RAT	Akr1a1	1.37	2.08	1.18	2.99	1.37	2.35	2.99	2.66
Proliferating cell nuclear antigen OS=Rattus norvegicus OX=10116 GN=Pcna PE=1 SV=1	PCNA_RAT	Pcna	4.14	2.32	2.32	1.98	0.547	1.98	2.32	3.13
AP-2 complex subunit mu OS=Rattus norvegicus OX=10116 GN=Ap2m1 PE=1 SV=1	AP2M1_RAT	Ap2m1	0.292	0.468	0.292	0.566	0.566	0.377	0.212	0.137
Glutaminase kidney isoform, mitochondrial OS=Rattus norvegicus OX=10116 GN=Gls PE=1 SV=2	GLSK_RAT	Gls	0.476	0.754	0.476	0.754	0.913	0.609	0.913	0.413
Nucleoside diphosphate kinase A OS=Rattus norvegicus OX=10116 GN=Nme1 PE=1 SV=1	NDKA_RAT	Nme1	19.8	11.2	11.2	9.2	16.4	11.2	23.9	19.8
60S ribosomal protein L18 OS=Rattus norvegicus OX=10116 GN=Rpl18 PE=1 SV=2	RL18_RAT	Rpl18	2.64	1.73	2.64	2.15	2.15	2.64	2.64	1.73
Eukaryotic translation initiation factor 3 subunit C OS=Rattus norvegicus OX=10116 GN=Eif3c PE=1 SV=1	EIF3C_RAT	Eif3c	0.315	0.441	0.238	0.441	0.398	0.579	0.398	0.441
40S ribosomal protein S17 OS=Rattus norvegicus OX=10116 GN=Rps17 PE=1 SV=3	RS17_RAT	Rps17	14.7	6.15	9.6	9.6	11.9	7.71	11.9	14.7
DnaJ homolog subfamily A member 1 OS=Rattus norvegicus OX=10116 GN=Dnaja1 PE=1 SV=1	DNJA1_RAT	Dnaja1	0.89	1.69	1.03	1.34	0.761	0.89	1.03	0.89
60S ribosomal protein L13a OS=Rattus norvegicus OX=10116 GN=Rpl13a PE=1 SV=2	RL13A_RAT	Rpl13a	1.22	0.944	0.49	0.702	0.702	0.944	0.944	0.702
40S ribosomal protein S19 OS=Rattus norvegicus OX=10116 GN=Rps19 PE=2 SV=3	RS19_RAT	Rps19	5.71	7.11	4.54	2.79	7.11	3.58	5.71	4.54
Ras-related protein Rab-6A OS=Rattus norvegicus OX=10116 GN=Rab6a PE=1 SV=2	RAB6A_RAT	Rab6a	7.32	1.88	3.29	2.76	3.29	3.9	2.76	1.88
40S ribosomal protein S16 OS=Rattus norvegicus OX=10116 GN=Rps16 PE=1 SV=2	RS16_RAT	Rps16	5.47	4.36	4.36	2.69	4.36	2.06	3.45	5.47
Succinyl-CoA:3-ketoacid coenzyme A transferase 1, mitochondrial OS=Rattus norvegicus OX=10116 GN=Oxct1 PE=1 SV=1	SCOT1_RAT	Oxct1	0.763	1.21	1.34	1.09	0.574	1.48	1.62	1.34
DNA polymerase alpha catalytic subunit (Fragment) OS=Rattus norvegicus OX=10116 GN=Pola1 PE=2 SV=1	DPOLA_RAT	Pola1	0.102	0.124	0.124	0.146	0.169	0.102	0.0602	0.0602
40S ribosomal protein S8 OS=Rattus norvegicus OX=10116 GN=Rps8 PE=1 SV=2	RS8_RAT	Rps8	1.17	1.46	1.46	1.8	2.19	1.17	2.63	2.19
ATP-binding cassette sub-family D member 3 OS=Rattus norvegicus OX=10116 GN=Abcd3 PE=1 SV=3	ABCD3_RAT	Abcd3	0.466	0.405	0.466	0.596	0.405	0.466	0.346	0.466
60S ribosomal protein L10 OS=Rattus norvegicus OX=10116 GN=Rpl10 PE=1 SV=3	RL10_RAT	Rpl10	2.55	1.43	1.14	2.13	2.55	2.55	3.03	2.13
Nuclear pore complex protein Nup155 OS=Rattus norvegicus OX=10116 GN=Nup155 PE=1 SV=1	NU155_RAT	Nup155	0.0866	0.133	0.0643	0.156	0.133	0.156	0.133	0.109
Aldose reductase OS=Rattus norvegicus OX=10116 GN=Akr1b1 PE=1 SV=3	ALDR_RAT	Akr1b1	2.15	1.64	1.64	2.44	1.88	1.64	2.76	1.88
Ras-related protein Rab-10 OS=Rattus norvegicus OX=10116 GN=Rab10 PE=1 SV=1	RAB10_RAT	Rab10	1.59	1.97	1.97	1.97	2.4	2.4	1.97	1.97
ATP-binding cassette sub-family C member 8 OS=Rattus norvegicus OX=10116 GN=Abcc8 PE=1 SV=4	ABCC8_RAT	Abcc8	0.0952	0.221	0.157	0.244	0.244	0.199	0.244	0.178
Isocitrate dehydrogenase [NADP] cytoplasmic OS=Rattus norvegicus OX=10116 GN=Idh1 PE=1 SV=1	IDHC_RAT	Idh1	0.843	2.17	1.11	2.17	0.972	1.42	1.26	1.11
Signal recognition particle 54 kDa protein OS=Rattus norvegicus OX=10116 GN=Srp54 PE=2 SV=1	SRP54_RAT	Srp54	0.187	0.257	0.187	0.257	0.257	0.257	0	0.187
Fatty-acid amide hydrolase 1 OS=Rattus norvegicus OX=10116 GN=Faah PE=1 SV=1	FAAH1_RAT	Faah	0.574	0.741	1.03	0.831	1.24	0.831	0.497	0.353
Nuclear pore complex protein Nup93 OS=Rattus norvegicus OX=10116 GN=Nup93 PE=1 SV=1	NUP93_RAT	Nup93	0.459	0.229	0.459	0.272	0.316	0.316	0.316	0.229
Serine/threonine-protein kinase PAK 2 OS=Rattus norvegicus OX=10116 GN=Pak2 PE=1 SV=1	PAK2_RAT	Pak2	0.733	1.04	1.04	1.28	1.28	1.28	1.16	0.934
Pterin-4-alpha-carbinolamine dehydratase OS=Rattus norvegicus OX=10116 GN=Pcbd1 PE=1 SV=2	PHS_RAT	Pcbd1	8.57	2.51	4.79	4.79	3.51	4.79	6.44	8.57
Endoplasmic reticulum resident protein 29 OS=Rattus norvegicus OX=10116 GN=Erp29 PE=1 SV=2	ERP29_RAT	Erp29	2	1.69	2.35	2	2.35	2	2.35	3.17
Golgin subfamily A member 2 OS=Rattus norvegicus OX=10116 GN=Golga2 PE=1 SV=4	GOGA2_RAT	Golga2	0.0891	0.186	0.0586	0.292	0.22	0.407	0.186	0.292
Aspartate aminotransferase, mitochondrial OS=Rattus norvegicus OX=10116 GN=Got2 PE=1 SV=2	AATM_RAT	Got2	2.13	1.09	1.24	1.56	1.09	1.09	2.13	1.74
Neurolysin, mitochondrial OS=Rattus norvegicus OX=10116 GN=Nln PE=1 SV=1	NEUL_RAT	Nln	0.376	0.55	0.613	0.55	0.49	0.432	0.376	0.322
Kinesin-like protein KIF1B OS=Rattus norvegicus OX=10116 GN=Kif1b PE=1 SV=2	KIF1B_RAT	Kif1b	0.0485	0.0652	0.0821	0.0485	0.0652	0.0321	0.0652	0.0485
Ataxin-10 OS=Rattus norvegicus OX=10116 GN=Atxn10 PE=1 SV=1	ATX10_RAT	Atxn10	0.704	0.704	1.16	1.16	1.04	1.04	0.808	0.514
Caprin-1 OS=Rattus norvegicus OX=10116 GN=Caprin1 PE=1 SV=2	CAPR1_RAT	Caprin1	0.57	0.446	0.927	0.635	0.507	0.446	0.446	0.388
Glutathione S-transferase Mu 5 OS=Rattus norvegicus OX=10116 GN=Gstm5 PE=1 SV=3	GSTM5_RAT	Gstm5	3.09	1.88	1.88	2.24	2.24	2.64	3.09	2.24
Protein transport protein Sec61 subunit alpha isoform 1 OS=Rattus norvegicus OX=10116 GN=Sec61a1 PE=2 SV=2	S61A1_RAT	Sec61a1	0.531	0.729	0.44	0.729	1.21	0.729	0.953	0.531
ATP-binding cassette sub-family A member 2 OS=Rattus norvegicus OX=10116 GN=Abca2 PE=1 SV=1	ABCA2_RAT	Abca2	0.0364	0.0241	0.0614	0	0	0	0	0.0241
Catechol O-methyltransferase OS=Rattus norvegicus OX=10116 GN=Comt PE=1 SV=2	COMT_RAT	Comt	2.22	1.6	2.22	2.22	1.9	1.6	1.9	3.43
Ezrin OS=Rattus norvegicus OX=10116 GN=Ezr PE=1 SV=3	EZRI_RAT	Ezr	0.513	0.38	0.585	0.585	0.659	0.513	0.202	0.38
Voltage-dependent anion-selective channel protein 2 OS=Rattus norvegicus OX=10116 GN=Vdac2 PE=1 SV=2	VDAC2_RAT	Vdac2	1.97	2.28	1.97	2.28	1.21	1.44	2.28	1.97
26S proteasome non-ATPase regulatory subunit 11 OS=Rattus norvegicus OX=10116 GN=Psmd11 PE=1 SV=2	PSD11_RAT	Psmd11	0.827	1.23	0.827	1.73	0.709	0.954	1.09	1.23
GTP-binding protein Rab-3D OS=Rattus norvegicus OX=10116 GN=Rab3d PE=1 SV=2	RAB3D_RAT	Rab3d	3.1	3.66	3.1	3.66	3.66	3.66	5.03	3.66
60S ribosomal protein L10a OS=Rattus norvegicus OX=10116 GN=Rpl10a PE=1 SV=2	RL10A_RAT	Rpl10a	1.73	2.1	1.12	1.41	1.12	1.73	1.41	1.41
Actin-related protein 2/3 complex subunit 2 OS=Rattus norvegicus OX=10116 GN=Arpc2 PE=1 SV=1	ARPC2_RAT	Arpc2	2	1.74	0.899	1.28	1.08	0.733	1.28	1.5
NADH dehydrogenase [ubiquinone] 1 alpha subcomplex subunit 9, mitochondrial OS=Rattus norvegicus OX=10116 GN=Ndufa9 PE=1 SV=2	NDUA9_RAT	Ndufa9	1.84	2.29	0.815	1.63	0.685	0.955	2.06	1.63
60S ribosomal protein L9 OS=Rattus norvegicus OX=10116 GN=Rpl9 PE=1 SV=1	RL9_RAT	Rpl9	5.34	3.14	3.77	3.14	4.5	3.77	3.77	2.59
Huntingtin OS=Rattus norvegicus OX=10116 GN=Htt PE=1 SV=1	HD_RAT	Htt	0.078	0.019	0.078	0	0.0286	0.019	0.0286	0
Ester hydrolase C11orf54 homolog OS=Rattus norvegicus OX=10116 PE=1 SV=1	CK054_RAT		1.7	1.46	0.718	1.95	1.46	2.53	2.23	1.7
Unconventional myosin-IXb OS=Rattus norvegicus OX=10116 GN=Myo9b PE=1 SV=1	MYO9B_RAT	Myo9b	0.0439	0.0291	0.0291	0.0743	0.0439	0	0.0291	0
GMP synthase [glutamine-hydrolyzing] OS=Rattus norvegicus OX=10116 GN=Gmps PE=1 SV=1	GUAA_RAT	Gmps	0.455	0.517	0.455	0.396	0.582	0.649	0.455	0.582
Xaa-Pro aminopeptidase 1 OS=Rattus norvegicus OX=10116 GN=Xpnpep1 PE=1 SV=1	XPP1_RAT	Xpnpep1	0.444	0.582	0.444	0.511	1.18	0.582	0.511	0.657
CREB-binding protein OS=Rattus norvegicus OX=10116 GN=Crebbp PE=1 SV=1	CBP_RAT	Crebbp	0.0246	0	0.0371	0.0498	0.0246	0	0	0
EH domain-containing protein 1 OS=Rattus norvegicus OX=10116 GN=Ehd1 PE=1 SV=1	EHD1_RAT	Ehd1	0.301	0.783	0.445	0.88	0.783	0.605	0.692	0.234
Membrane-associated progesterone receptor component 1 OS=Rattus norvegicus OX=10116 GN=Pgrmc1 PE=1 SV=3	PGRC1_RAT	Pgrmc1	4.64	7.69	5.52	6.53	4.64	7.69	9.04	5.52
Histone-binding protein RBBP7 OS=Rattus norvegicus OX=10116 GN=Rbbp7 PE=2 SV=1	RBBP7_RAT	Rbbp7	0.942	0.942	0.701	1.22	0.942	0.942	1.22	1.22
V-type proton ATPase subunit C 1 OS=Rattus norvegicus OX=10116 GN=Atp6v1c1 PE=2 SV=1	VATC1_RAT	Atp6v1c1	1.06	1.22	0.543	1.38	1.06	1.22	1.75	1.38
CDK5 regulatory subunit-associated protein 2 OS=Rattus norvegicus OX=10116 GN=Cdk5rap2 PE=1 SV=2	CK5P2_RAT	Cdk5rap2	0	0.0304	0	0	0	0	0	0
Alpha-actinin-1 OS=Rattus norvegicus OX=10116 GN=Actn1 PE=1 SV=1	ACTN1_RAT	Actn1	1.39	2.27	0.647	1.32	1.71	1.63	1.63	1.32
NADH dehydrogenase [ubiquinone] iron-sulfur protein 2, mitochondrial OS=Rattus norvegicus OX=10116 GN=Ndufs2 PE=1 SV=1	NDUS2_RAT	Ndufs2	0.438	0.833	0.833	0.947	0.725	0.725	1.2	0.947
40S ribosomal protein S18 OS=Rattus norvegicus OX=10116 GN=Rps18 PE=1 SV=3	RS18_RAT	Rps18	8.52	4.66	7	8.52	8.52	7	8.52	4.66
Vesicle-trafficking protein SEC22b OS=Rattus norvegicus OX=10116 GN=Sec22b PE=1 SV=3	SC22B_RAT	Sec22b	6.52	4.84	3	3.54	4.84	4.15	6.52	6.52
Dynactin subunit 2 OS=Rattus norvegicus OX=10116 GN=Dctn2 PE=1 SV=1	DCTN2_RAT	Dctn2	1.21	1.37	1.05	1.37	1.37	1.37	2.16	1.55
ATP-binding cassette sub-family F member 1 OS=Rattus norvegicus OX=10116 GN=Abcf1 PE=1 SV=1	ABCF1_RAT	Abcf1	0.144	0.144	0.0696	0.224	0.144	0.183	0.144	0.224
Actin-related protein 2 OS=Rattus norvegicus OX=10116 GN=Actr2 PE=2 SV=1	ARP2_RAT	Actr2	1.7	1.9	0.893	2.11	0.893	1.34	1.51	1.34
Eukaryotic translation initiation factor 3 subunit E OS=Rattus norvegicus OX=10116 GN=Eif3e PE=2 SV=1	EIF3E_RAT	Eif3e	0.731	1.35	0.84	1.35	0.731	1.21	1.21	0.731
Acetoacetyl-CoA synthetase OS=Rattus norvegicus OX=10116 GN=Aacs PE=1 SV=1	AACS_RAT	Aacs	0.467	0.667	0.667	0.74	0.816	0.467	0.598	0.667
Bleomycin hydrolase OS=Rattus norvegicus OX=10116 GN=Blmh PE=1 SV=1	BLMH_RAT	Blmh	0.355	0.355	0.44	0.627	0.531	0.531	0.44	0.531
Pre-mRNA-processing factor 6 OS=Rattus norvegicus OX=10116 GN=Prpf6 PE=1 SV=1	PRP6_RAT	Prpf6	0.0944	0.351	0.162	0.311	0.392	0.435	0.311	0.272
Fragile X mental retardation syndrome-related protein 1 OS=Rattus norvegicus OX=10116 GN=Fxr1 PE=1 SV=1	FXR1_RAT	Fxr1	0.567	0.491	0.913	0.567	0.731	0.731	0.647	0.491
Kinesin light chain 1 OS=Rattus norvegicus OX=10116 GN=Klc1 PE=1 SV=2	KLC1_RAT	Klc1	0.284	0.569	0.917	0.735	0.569	0.824	0.42	0.284
60S ribosomal protein L21 OS=Rattus norvegicus OX=10116 GN=Rpl21 PE=1 SV=3	RL21_RAT	Rpl21	3.51	2.23	2.23	2.23	1.73	2.23	1.73	2.81
C-1-tetrahydrofolate synthase, cytoplasmic OS=Rattus norvegicus OX=10116 GN=Mthfd1 PE=1 SV=3	C1TC_RAT	Mthfd1	0.289	0.249	0.0656	0.331	0.374	0.136	0.21	0.21
Guanine nucleotide-binding protein G(q) subunit alpha OS=Rattus norvegicus OX=10116 GN=Gnaq PE=2 SV=2	GNAQ_RAT	Gnaq	1.29	1.87	1.29	1.47	1.12	1.29	1.47	0.969
Nucleoside diphosphate kinase B OS=Rattus norvegicus OX=10116 GN=Nme2 PE=1 SV=1	NDKB_RAT	Nme2	48.7	40.6	19.5	33.8	40.6	23.4	40.6	33.8
Serine--tRNA ligase, cytoplasmic OS=Rattus norvegicus OX=10116 GN=Sars PE=1 SV=3	SYSC_RAT	Sars	0.546	0.724	1.03	0.922	1.03	1.03	0.82	0.922
DNA replication licensing factor MCM6 (Fragment) OS=Rattus norvegicus OX=10116 GN=Mcm6 PE=1 SV=2	MCM6_RAT	Mcm6	0.742	1.57	0.395	1.3	1.57	1.43	0.742	0.742
Serine/threonine-protein kinase PRP4 homolog OS=Rattus norvegicus OX=10116 GN=Prpf4b PE=1 SV=1	PRP4B_RAT	Prpf4b	0.116	0	0.0859	0.0859	0	0.0565	0.0565	0
WD40 repeat-containing protein SMU1 OS=Rattus norvegicus OX=10116 GN=Smu1 PE=2 SV=1	SMU1_RAT	Smu1	0.474	0.558	0.74	0.74	0.646	0.74	0.248	0.319
Cell division cycle 5-like protein OS=Rattus norvegicus OX=10116 GN=Cdc5l PE=1 SV=2	CDC5L_RAT	Cdc5l	0.276	0.367	0.232	0.518	0.466	0.367	0.321	0.416
Cytosolic non-specific dipeptidase OS=Rattus norvegicus OX=10116 GN=Cndp2 PE=1 SV=1	CNDP2_RAT	Cndp2	0.723	0.944	0.83	0.83	1.19	0.83	0.944	0.622
Heterogeneous nuclear ribonucleoprotein C OS=Rattus norvegicus OX=10116 GN=Hnrnpc PE=1 SV=2	HNRPC_RAT	Hnrnpc	1.15	2.16	1.61	2.16	1.61	1.87	1.61	1.37
Keratin, type II cytoskeletal 1 OS=Rattus norvegicus OX=10116 GN=Krt1 PE=2 SV=1	K2C1_RAT	Krt1	0.483	0.279	0.483	0.218	0.483	0.557	0.411	0.411
Chromodomain-helicase-DNA-binding protein 8 OS=Rattus norvegicus OX=10116 GN=Chd8 PE=1 SV=2	CHD8_RAT	Chd8	0	0	0	0	0.0225	0	0	0
Actin-related protein 3 OS=Rattus norvegicus OX=10116 GN=Actr3 PE=1 SV=1	ARP3_RAT	Actr3	0.496	0.957	1.39	1.39	1.39	1.24	1.24	0.711
Cytochrome c, somatic OS=Rattus norvegicus OX=10116 GN=Cycs PE=1 SV=2	CYC_RAT	Cycs	12.4	9.37	9.37	9.37	12.4	16.4	9.37	12.4
Core histone macro-H2A.1 OS=Rattus norvegicus OX=10116 GN=H2afy PE=1 SV=4	H2AY_RAT	H2afy	1.41	1.83	1.41	1.61	1.61	1.83	1.41	1.06
26S proteasome regulatory subunit 4 OS=Rattus norvegicus OX=10116 GN=Psmc1 PE=1 SV=1	PRS4_RAT	Psmc1	0.677	1.47	1.64	1.81	1.04	1.17	0.789	1.04
6-phosphogluconolactonase OS=Rattus norvegicus OX=10116 GN=Pgls PE=1 SV=1	6PGL_RAT	Pgls	2.55	4.62	2.55	3.47	2.16	2.98	2.98	3.47
Lamina-associated polypeptide 2, isoform beta OS=Rattus norvegicus OX=10116 GN=Tmpo PE=1 SV=3	LAP2_RAT	Tmpo	0.658	0.881	1.13	0.881	0.556	0.658	1	0.658
26S proteasome regulatory subunit 6A OS=Rattus norvegicus OX=10116 GN=Psmc3 PE=1 SV=1	PRS6A_RAT	Psmc3	0.677	0.677	0.677	0.473	0.677	1.04	0.572	0.295
Bifunctional purine biosynthesis protein PURH OS=Rattus norvegicus OX=10116 GN=Atic PE=1 SV=2	PUR9_RAT	Atic	0.416	0.728	1.01	0.644	1.11	1.01	0.909	0.564
SUMO-activating enzyme subunit 1 OS=Rattus norvegicus OX=10116 GN=Sae1 PE=2 SV=1	SAE1_RAT	Sae1	1.91	1.91	1.27	1.91	1.27	1.47	2.72	1.68
Septin-9 OS=Rattus norvegicus OX=10116 GN=Sept9 PE=1 SV=1	SEPT9_RAT	2009-09-01	0.735	0.735	0.493	0.735	1.02	0.824	0.569	0.65
Dihydrofolate reductase OS=Rattus norvegicus OX=10116 GN=Dhfr PE=1 SV=3	DYR_RAT	Dhfr	5.46	2.15	1.73	2.15	4.59	3.85	4.59	3.85
Mitochondrial fission 1 protein OS=Rattus norvegicus OX=10116 GN=Fis1 PE=1 SV=1	FIS1_RAT	Fis1	7.76	5.1	6.31	6.31	7.76	5.1	6.31	5.1
Phenazine biosynthesis-like domain-containing protein OS=Rattus norvegicus OX=10116 GN=Pbld PE=2 SV=1	PBLD_RAT	Pbld	1.99	1.45	1.45	3.02	1.45	1.22	2.3	1.45
26S proteasome regulatory subunit 7 OS=Rattus norvegicus OX=10116 GN=Psmc2 PE=1 SV=3	PRS7_RAT	Psmc2	0.803	1.34	0.925	1.34	0.803	1.05	0.803	0.581
Peroxisomal multifunctional enzyme type 2 OS=Rattus norvegicus OX=10116 GN=Hsd17b4 PE=1 SV=3	DHB4_RAT	Hsd17b4	0.38	0.38	0.326	0.38	0.326	0.38	0.38	0.326
GRIP1-associated protein 1 OS=Rattus norvegicus OX=10116 GN=Gripap1 PE=1 SV=1	GRAP1_RAT	Gripap1	0.143	0.143	0.306	0.182	0.182	0.222	0.182	0.105
GPI inositol-deacylase OS=Rattus norvegicus OX=10116 GN=Pgap1 PE=1 SV=1	PGAP1_RAT	Pgap1	0.24	0.24	0.166	0.166	0.203	0.166	0.166	0.166
Very-long-chain enoyl-CoA reductase OS=Rattus norvegicus OX=10116 GN=Tecr PE=1 SV=1	TECR_RAT	Tecr	0.549	0.845	0.419	0.69	0.845	0.845	0.549	0.419
Cap-specific mRNA (nucleoside-2'-O-)-methyltransferase 1 OS=Rattus norvegicus OX=10116 GN=Cmtr1 PE=1 SV=1	CMTR1_RAT	Cmtr1	0.308	0.106	0.183	0.183	0.183	0.265	0.223	0.183
Dynamin-1 OS=Rattus norvegicus OX=10116 GN=Dnm1 PE=1 SV=2	DYN1_RAT	Dnm1	0.26	0.535	0.345	0.586	0.535	0.586	0.485	0.437
Isovaleryl-CoA dehydrogenase, mitochondrial OS=Rattus norvegicus OX=10116 GN=Ivd PE=1 SV=2	IVD_RAT	Ivd	0.728	0.982	0.851	1.12	0.614	0.982	1.79	2.2
60S ribosomal protein L8 OS=Rattus norvegicus OX=10116 GN=Rpl8 PE=2 SV=2	RL8_RAT	Rpl8	0.751	1.19	0.959	0.959	0.751	0.959	0.751	1.19
NADH-ubiquinone oxidoreductase chain 4 OS=Rattus norvegicus OX=10116 GN=Mtnd4 PE=3 SV=3	NU4M_RAT	Mtnd4	0.739	0.446	0.538	0.446	0.635	0.446	0.36	0.36
Transforming protein RhoA OS=Rattus norvegicus OX=10116 GN=Rhoa PE=1 SV=1	RHOA_RAT	Rhoa	2.13	1.72	1.72	2.13	3.81	1.72	2.13	0.77
Dipeptidyl peptidase 2 OS=Rattus norvegicus OX=10116 GN=Dpp7 PE=1 SV=1	DPP2_RAT	Dpp7	0.335	0.683	0.499	0.683	0.335	0.683	0.588	0.415
Phospholipase A-2-activating protein OS=Rattus norvegicus OX=10116 GN=Plaa PE=1 SV=3	PLAP_RAT	Plaa	0.342	0.294	0.247	0.393	0.294	0.294	0.342	0.247
Ribose-phosphate pyrophosphokinase 1 OS=Rattus norvegicus OX=10116 GN=Prps1 PE=1 SV=2	PRPS1_RAT	Prps1	1.71	1.71	1.26	1.96	1.06	1.47	2.24	1.71
Phosphatidylinositide phosphatase SAC1 OS=Rattus norvegicus OX=10116 GN=Sacm1l PE=1 SV=1	SAC1_RAT	Sacm1l	0.269	0.396	0.396	0.464	0.464	0.688	0.331	0.464
Inositol 1,4,5-trisphosphate receptor type 1 OS=Rattus norvegicus OX=10116 GN=Itpr1 PE=1 SV=2	ITPR1_RAT	Itpr1	0.0314	0	0.0208	0	0.0421	0	0	0
Carnitine O-palmitoyltransferase 2, mitochondrial OS=Rattus norvegicus OX=10116 GN=Cpt2 PE=1 SV=1	CPT2_RAT	Cpt2	0.353	0.475	0.679	0.679	0.753	0.413	0.475	0.353
Creatine kinase U-type, mitochondrial OS=Rattus norvegicus OX=10116 GN=Ckmt1 PE=1 SV=1	KCRU_RAT	Ckmt1	0.145	1.1	0.605	0.605	0.402	0.225	0.605	0.838
Ral GTPase-activating protein subunit beta OS=Rattus norvegicus OX=10116 GN=Ralgapb PE=1 SV=1	RLGPB_RAT	Ralgapb	0.215	0.169	0.169	0.124	0.239	0.081	0.0601	0.0397
14-3-3 protein eta OS=Rattus norvegicus OX=10116 GN=Ywhah PE=1 SV=2	1433F_RAT	Ywhah	10.5	10.5	9.33	9.33	8.24	8.24	9.33	11.9
Elongation factor G, mitochondrial OS=Rattus norvegicus OX=10116 GN=Gfm1 PE=1 SV=2	EFGM_RAT	Gfm1	0.259	0.308	0.36	0.259	0.212	0.308	0.212	0.259
Fumarate hydratase, mitochondrial OS=Rattus norvegicus OX=10116 GN=Fh PE=1 SV=1	FUMH_RAT	Fh	0.506	0.693	0.693	0.903	0.597	0.693	0.597	0.506
Glutamine--fructose-6-phosphate aminotransferase [isomerizing] 1 OS=Rattus norvegicus OX=10116 GN=Gfpt1 PE=1 SV=3	GFPT1_RAT	Gfpt1	0.231	0.395	0.395	0.581	0.648	0.947	0.395	0.395
Plastin-3 OS=Rattus norvegicus OX=10116 GN=Pls3 PE=1 SV=2	PLST_RAT	Pls3	0.254	0.572	0.503	0.436	0.645	0.503	0.436	0.373
PC4 and SFRS1-interacting protein OS=Rattus norvegicus OX=10116 GN=Psip1 PE=1 SV=1	PSIP1_RAT	Psip1	0.174	0.306	0.306	0.306	0.378	0.306	0.238	0.238
Poly(U)-binding-splicing factor PUF60 OS=Rattus norvegicus OX=10116 GN=Puf60 PE=2 SV=2	PUF60_RAT	Puf60	0.449	0.611	0.699	0.991	0.888	0.611	0.528	0.528
Mitochondrial proton/calcium exchanger protein OS=Rattus norvegicus OX=10116 GN=Letm1 PE=1 SV=1	LETM1_RAT	Letm1	0.26	0.361	0.361	0.26	0.528	0.31	0.213	0.31
Polypyrimidine tract-binding protein 3 OS=Rattus norvegicus OX=10116 GN=Ptbp3 PE=2 SV=1	PTBP3_RAT	Ptbp3	0.324	0.657	0.481	0.854	0.252	0.657	0.481	0.324
Eukaryotic translation initiation factor 3 subunit H OS=Rattus norvegicus OX=10116 GN=Eif3h PE=1 SV=1	EIF3H_RAT	Eif3h	1.21	0.743	0.374	0.743	0.269	0.61	0.61	0.487
Na(+)/H(+) exchange regulatory cofactor NHE-RF1 OS=Rattus norvegicus OX=10116 GN=Slc9a3r1 PE=1 SV=3	NHRF1_RAT	Slc9a3r1	0.768	0.63	1.26	0.768	0.918	0.768	0.177	0.277
Beta-adrenergic receptor kinase 1 OS=Rattus norvegicus OX=10116 GN=Grk2 PE=1 SV=1	ARBK1_RAT	Grk2	0.222	0.324	0.222	0.324	0.494	0.324	0.128	0.174
ELKS/Rab6-interacting/CAST family member 1 OS=Rattus norvegicus OX=10116 GN=Erc1 PE=1 SV=1	RB6I2_RAT	Erc1	0	0.0608	0	0.0608	0.0608	0.0608	0.0608	0
Protein arginine N-methyltransferase 1 OS=Rattus norvegicus OX=10116 GN=Prmt1 PE=1 SV=1	ANM1_RAT	Prmt1	1.36	1.98	1.76	1.55	1.02	1.36	1.98	1.98
Myosin light polypeptide 6 OS=Rattus norvegicus OX=10116 GN=Myl6 PE=1 SV=3	MYL6_RAT	Myl6	9.5	4.09	2.55	2.55	5.1	4.09	6.31	9.5
PRA1 family protein 3 OS=Rattus norvegicus OX=10116 GN=Arl6ip5 PE=1 SV=1	PRAF3_RAT	Arl6ip5	0.78	1.74	1.38	1.06	1.06	2.17	1.06	0.78
Nuclear cap-binding protein subunit 1 OS=Rattus norvegicus OX=10116 GN=Ncbp1 PE=1 SV=1	NCBP1_RAT	Ncbp1	0.233	0.418	0.369	0.468	0.574	0.369	0.322	0.277
Proteasome activator complex subunit 1 OS=Rattus norvegicus OX=10116 GN=Psme1 PE=2 SV=1	PSME1_RAT	Psme1	2	2.35	2	2.74	3.17	2	4.81	3.17
40S ribosomal protein S6 OS=Rattus norvegicus OX=10116 GN=Rps6 PE=1 SV=1	RS6_RAT	Rps6	1.15	1.4	0.729	1.4	1.15	0.729	1.15	0.929
Coiled-coil domain-containing protein 47 OS=Rattus norvegicus OX=10116 GN=Ccdc47 PE=2 SV=1	CCD47_RAT	Ccdc47	0.492	0.672	0.672	0.672	0.672	0.579	0.579	0.492
Coronin-1B OS=Rattus norvegicus OX=10116 GN=Coro1b PE=1 SV=1	COR1B_RAT	Coro1b	0.267	0.512	0.194	0.194	0.512	0.267	0.344	0.194
Eukaryotic translation initiation factor 4H OS=Rattus norvegicus OX=10116 GN=Eif4h PE=1 SV=1	IF4H_RAT	Eif4h	1.81	1.5	1.23	2.96	1.5	1.81	2.53	1.81
Non-specific lipid-transfer protein OS=Rattus norvegicus OX=10116 GN=Scp2 PE=1 SV=3	NLTP_RAT	Scp2	0.461	0.384	0.242	0.242	0.384	0.384	0.542	0.242
Reticulon-3 OS=Rattus norvegicus OX=10116 GN=Rtn3 PE=1 SV=1	RTN3_RAT	Rtn3	0.135	0.209	0.0995	0.135	0.209	0.135	0.171	0.209
Serine/threonine-protein phosphatase PP1-alpha catalytic subunit OS=Rattus norvegicus OX=10116 GN=Ppp1ca PE=1 SV=1	PP1A_RAT	Ppp1ca	1.32	1.32	0.803	1.32	1.52	0.657	1.75	1.75
Multifunctional protein ADE2 OS=Rattus norvegicus OX=10116 GN=Paics PE=1 SV=3	PUR6_RAT	Paics	0.715	0.963	0.603	0.835	0.963	0.963	0.835	0.835
Protein unc-45 homolog A OS=Rattus norvegicus OX=10116 GN=Unc45a PE=2 SV=1	UN45A_RAT	Unc45a	0.243	0.282	0.0977	0.364	0.644	0.407	0.205	0.243
Cyclin-G-associated kinase OS=Rattus norvegicus OX=10116 GN=Gak PE=1 SV=1	GAK_RAT	Gak	0.223	0.196	0.0695	0.223	0.196	0.0695	0.0695	0.0458
Protein/nucleic acid deglycase DJ-1 OS=Rattus norvegicus OX=10116 GN=Park7 PE=1 SV=1	PARK7_RAT	Park7	2.45	3.03	2.45	2.45	2.45	3.71	1.96	2.45
Misshapen-like kinase 1 OS=Rattus norvegicus OX=10116 GN=Mink1 PE=1 SV=2	MINK1_RAT	Mink1	0.0894	0.0894	0.0894	0.0663	0.0894	0.0894	0.0437	0.0437
Pyruvate dehydrogenase E1 component subunit alpha, somatic form, mitochondrial OS=Rattus norvegicus OX=10116 GN=Pdha1 PE=1 SV=2	ODPA_RAT	Pdha1	0.246	0.799	0.936	0.799	0.936	0.936	0.671	0.799
Proteasome subunit alpha type-7 OS=Rattus norvegicus OX=10116 GN=Psma7 PE=1 SV=1	PSA7_RAT	Psma7	2.38	0.944	2.03	0.74	1.43	1.43	1.71	2.03
40S ribosomal protein S11 OS=Rattus norvegicus OX=10116 GN=Rps11 PE=1 SV=3	RS11_RAT	Rps11	0.953	0.953	0.652	0.652	0.953	0.652	0.953	0.652
Eukaryotic translation initiation factor 2 subunit 3, X-linked OS=Rattus norvegicus OX=10116 GN=Eif2s3 PE=1 SV=2	IF2G_RAT	Eif2s3	0.646	0.864	0.133	0.546	0.453	0.283	0.365	0.453
Prenylcysteine oxidase OS=Rattus norvegicus OX=10116 GN=Pcyox1 PE=1 SV=1	PCYOX_RAT	Pcyox1	0.572	0.486	0.761	0.761	0.572	0.863	0.664	0.327
Prosaposin OS=Rattus norvegicus OX=10116 GN=Psap PE=1 SV=1	SAP_RAT	Psap	0.441	0.368	0.441	0.368	0.368	0.368	0.368	0.441
Cyclin-dependent kinase 12 OS=Rattus norvegicus OX=10116 GN=Cdk12 PE=1 SV=1	CDK12_RAT	Cdk12	0.0401	0.103	0.0401	0	0	0.0401	0	0
Alcohol dehydrogenase class-3 OS=Rattus norvegicus OX=10116 GN=Adh5 PE=1 SV=2	ADHX_RAT	Adh5	0.616	0.616	0.377	0.492	0.377	0.616	0.492	0.377
Eukaryotic translation initiation factor 2 subunit 1 OS=Rattus norvegicus OX=10116 GN=Eif2s1 PE=1 SV=2	IF2A_RAT	Eif2s1	1.4	1.4	0.845	1.62	1.01	1.2	1.86	1.4
Microtubule-associated protein RP/EB family member 1 OS=Rattus norvegicus OX=10116 GN=Mapre1 PE=1 SV=3	MARE1_RAT	Mapre1	0.875	0.875	1.57	2.9	1.08	1.08	1.31	1.31
60S ribosomal protein L26 OS=Rattus norvegicus OX=10116 GN=Rpl26 PE=1 SV=1	RL26_RAT	Rpl26	3.94	2.47	2.47	2.47	1.9	3.14	3.94	2.47
Long-chain-fatty-acid--CoA ligase 4 OS=Rattus norvegicus OX=10116 GN=Acsl4 PE=1 SV=1	ACSL4_RAT	Acsl4	0.188	0.188	0.138	0.352	0.0899	0.352	0.188	0.138
Ras-related protein Rab-5A OS=Rattus norvegicus OX=10116 GN=Rab5a PE=2 SV=1	RAB5A_RAT	Rab5a	1.87	1.87	1.52	1.52	1.87	1.52	1.21	1.52
RNA-binding motif protein, X chromosome OS=Rattus norvegicus OX=10116 GN=Rbmx PE=1 SV=1	RBMX_RAT	Rbmx	0.456	1.28	1.28	1.46	0.823	0.823	1.12	0.823
60S ribosomal protein L18a OS=Rattus norvegicus OX=10116 GN=Rpl18a PE=2 SV=1	RL18A_RAT	Rpl18a	1.45	0.817	1.11	0.817	1.11	0.817	0.565	1.11
60S ribosomal protein L27 OS=Rattus norvegicus OX=10116 GN=Rpl27 PE=2 SV=2	RL27_RAT	Rpl27	4.74	2.2	2.2	1.64	2.89	2.89	2.2	1.64
Hypoxanthine-guanine phosphoribosyltransferase OS=Rattus norvegicus OX=10116 GN=Hprt1 PE=1 SV=1	HPRT_RAT	Hprt1	1.78	1.15	1.45	1.78	1.78	2.59	2.16	1.78
Glycylpeptide N-tetradecanoyltransferase 1 OS=Rattus norvegicus OX=10116 GN=Nmt1 PE=1 SV=1	NMT1_RAT	Nmt1	0.4	0.566	0.48	0.566	0.4	0.751	0.4	0.48
Tryptophan--tRNA ligase, cytoplasmic OS=Rattus norvegicus OX=10116 GN=Wars PE=1 SV=2	SYWC_RAT	Wars	0.265	0.51	0.601	0.51	0.424	0.601	0.601	0.424
Gamma-enolase OS=Rattus norvegicus OX=10116 GN=Eno2 PE=1 SV=2	ENOG_RAT	Eno2	0.603	1.25	0.963	1.4	1.1	1.1	1.57	1.25
Glutathione S-transferase omega-1 OS=Rattus norvegicus OX=10116 GN=Gsto1 PE=1 SV=2	GSTO1_RAT	Gsto1	1.77	1.21	1.48	1.48	2.11	1.48	1.48	2.11
Pyruvate dehydrogenase E1 component subunit beta, mitochondrial OS=Rattus norvegicus OX=10116 GN=Pdhb PE=1 SV=2	ODPB_RAT	Pdhb	0.914	1.44	1.08	2.11	0.765	1.25	1.65	1.65
Cytochrome b-c1 complex subunit 1, mitochondrial OS=Rattus norvegicus OX=10116 GN=Uqcrc1 PE=1 SV=1	QCR1_RAT	Uqcrc1	0.719	0.939	0.524	0.939	0.826	0.719	1.19	0.939
Plasma membrane calcium-transporting ATPase 3 OS=Rattus norvegicus OX=10116 GN=Atp2b3 PE=1 SV=2	AT2B3_RAT	Atp2b3	0.291	0.321	0.352	0.321	0.261	0	0.291	0.232
Protein ERGIC-53 OS=Rattus norvegicus OX=10116 GN=Lman1 PE=1 SV=1	LMAN1_RAT	Lman1	0.316	0.469	0.469	0.469	0.552	0.469	0.64	0.552
Mitogen-activated protein kinase 3 OS=Rattus norvegicus OX=10116 GN=Mapk3 PE=1 SV=5	MK03_RAT	Mapk3	0.939	1.09	0.939	1.09	0.801	1.25	2.02	1.6
14-3-3 protein theta OS=Rattus norvegicus OX=10116 GN=Ywhaq PE=1 SV=1	1433T_RAT	Ywhaq	11	7.54	9.71	7.54	12.4	12.4	9.71	8.56
Eukaryotic translation initiation factor 3 subunit D OS=Rattus norvegicus OX=10116 GN=Eif3d PE=1 SV=1	EIF3D_RAT	Eif3d	0.349	0.418	0.567	0.491	0.82	0.418	0.349	0.161
Exocyst complex component 4 OS=Rattus norvegicus OX=10116 GN=Exoc4 PE=1 SV=1	EXOC4_RAT	Exoc4	0.123	0.299	0.0911	0.262	0.377	0.226	0.226	0.19
Far upstream element-binding protein 1 OS=Rattus norvegicus OX=10116 GN=Fubp1 PE=1 SV=1	FUBP1_RAT	Fubp1	0.268	0.687	0.534	0.609	0.463	0.395	0.463	0.268
Histone deacetylase 1 OS=Rattus norvegicus OX=10116 GN=Hdac1 PE=1 SV=1	HDAC1_RAT	Hdac1	0.588	1	0.683	0.683	0.683	0.783	0.783	0.499
N-alpha-acetyltransferase 25, NatB auxiliary subunit OS=Rattus norvegicus OX=10116 GN=Naa25 PE=2 SV=1	NAA25_RAT	Naa25	0.155	0.0904	0.122	0.297	0.26	0.122	0.189	0.224
Peptidyl-prolyl cis-trans isomerase D OS=Rattus norvegicus OX=10116 GN=Ppid PE=1 SV=3	PPID_RAT	Ppid	0.262	0.862	0.475	1.01	0.475	0.862	0.723	0.723
Plasminogen activator inhibitor 1 RNA-binding protein OS=Rattus norvegicus OX=10116 GN=Serbp1 PE=1 SV=2	PAIRB_RAT	Serbp1	0.425	0.53	0.328	0.53	0.643	0.53	0.425	0.425
Translationally-controlled tumor protein OS=Rattus norvegicus OX=10116 GN=Tpt1 PE=1 SV=1	TCTP_RAT	Tpt1	4.76	2.57	3.91	3.19	3.19	5.75	8.28	2.57
Phosphatidylinositol 3,4,5-trisphosphate 5-phosphatase 2 OS=Rattus norvegicus OX=10116 GN=Inppl1 PE=1 SV=1	SHIP2_RAT	Inppl1	0.231	0.0718	0	0.0473	0	0.0473	0.0969	0.0473
Dihydropteridine reductase OS=Rattus norvegicus OX=10116 GN=Qdpr PE=1 SV=1	DHPR_RAT	Qdpr	2.4	2.01	2.4	1.36	2.84	2.01	1.66	2.84
Erlin-2 OS=Rattus norvegicus OX=10116 GN=Erlin2 PE=1 SV=1	ERLN2_RAT	Erlin2	0.286	0.797	0.954	0.52	0.954	0.52	0.653	0.797
Stomatin-like protein 2, mitochondrial OS=Rattus norvegicus OX=10116 GN=Stoml2 PE=1 SV=1	STML2_RAT	Stoml2	1.68	0.932	0.779	0.932	0.509	1.1	1.28	1.68
Microtubule-associated protein 6 OS=Rattus norvegicus OX=10116 GN=Map6 PE=1 SV=1	MAP6_RAT	Map6	0.0659	0	0.1	0	0.0659	0.0659	0.0659	0.0659
Keratin, type II cytoskeletal 5 OS=Rattus norvegicus OX=10116 GN=Krt5 PE=1 SV=1	K2C5_RAT	Krt5	0.363	0	0.435	0.294	0.435	0.764	0.435	0.511
Apoptotic protease-activating factor 1 OS=Rattus norvegicus OX=10116 GN=Apaf1 PE=1 SV=1	APAF_RAT	Apaf1	0	0	0	0.0466	0	0	0	0
Tropomyosin alpha-4 chain OS=Rattus norvegicus OX=10116 GN=Tpm4 PE=1 SV=3	TPM4_RAT	Tpm4	2	2.74	3.17	2.35	2	2.35	2.35	3.66
Enhancer of mRNA-decapping protein 4 OS=Rattus norvegicus OX=10116 GN=Edc4 PE=1 SV=1	EDC4_RAT	Edc4	0.209	0.184	0.159	0.159	0.209	0.088	0	0.0653
Maleylacetoacetate isomerase OS=Rattus norvegicus OX=10116 GN=Gstz1 PE=1 SV=2	MAAI_RAT	Gstz1	2.67	1.48	1.83	1.48	1.83	1.18	1.48	1.48
Protein phosphatase 1 regulatory subunit 12A OS=Rattus norvegicus OX=10116 GN=Ppp1r12a PE=1 SV=2	MYPT1_RAT	Ppp1r12a	0.182	0.182	0.118	0.182	0.182	0.182	0.182	0.25
60S ribosomal protein L14 OS=Rattus norvegicus OX=10116 GN=Rpl14 PE=1 SV=3	RL14_RAT	Rpl14	0.493	0.706	0.706	0.706	0.493	0.706	0.493	0.95
Zinc finger RNA-binding protein OS=Rattus norvegicus OX=10116 GN=Zfr PE=1 SV=2	ZFR_RAT	Zfr	0.212	0.212	0.116	0.212	0.179	0.179	0.212	0.212
Tyrosine-protein phosphatase non-receptor type 23 (Fragment) OS=Rattus norvegicus OX=10116 GN=Ptpn23 PE=1 SV=2	PTN23_RAT	Ptpn23	0.103	0.082	0.125	0.0609	0.171	0	0.082	0.082
G-protein coupled receptor-associated sorting protein 1 OS=Rattus norvegicus OX=10116 GN=Gprasp1 PE=1 SV=1	GASP1_RAT	Gprasp1	0.112	0.0887	0.112	0.16	0.16	0.0434	0	0
Heterogeneous nuclear ribonucleoprotein Q OS=Rattus norvegicus OX=10116 GN=Syncrip PE=2 SV=1	HNRPQ_RAT	Syncrip	0.533	0.377	0.533	0.377	0.617	0.306	0.617	0.377
WASH complex subunit 2 OS=Rattus norvegicus OX=10116 GN=Washc2 PE=1 SV=1	WASC2_RAT	Washc2	0.117	0.0927	0.0927	0.221	0.221	0.0927	0.0687	0.0687
Calmodulin-1 OS=Rattus norvegicus OX=10116 GN=Calm1 PE=1 SV=1	CALM1_RAT (+2)	Calm1	9.65	1.98	11.8	1.98	17.4	7.88	5.17	6.4
Chloride intracellular channel protein 1 OS=Rattus norvegicus OX=10116 GN=Clic1 PE=1 SV=1	CLIC1_RAT	Clic1	2.19	1.84	2.19	1.53	1.84	1.25	1.25	2.19
Casein kinase II subunit alpha OS=Rattus norvegicus OX=10116 GN=Csnk2a1 PE=1 SV=2	CSK21_RAT	Csnk2a1	0.756	0.884	0.422	1.02	0.525	0.756	1.02	0.884
Proteasome subunit beta type-1 OS=Rattus norvegicus OX=10116 GN=Psmb1 PE=1 SV=3	PSB1_RAT	Psmb1	5.65	1.9	1.9	2.27	1.9	2.27	1.58	3.66
Receptor-type tyrosine-protein phosphatase N2 OS=Rattus norvegicus OX=10116 GN=Ptprn2 PE=1 SV=1	PTPR2_RAT	Ptprn2	0.122	0.09	0.122	0.154	0.122	0.188	0.09	0.09
UBX domain-containing protein 1 OS=Rattus norvegicus OX=10116 GN=Ubxn1 PE=3 SV=2	UBXN1_RAT	Ubxn1	1.33	1.33	1.12	1.56	1.33	1.12	1.12	0.6
Vesicle-associated membrane protein-associated protein A OS=Rattus norvegicus OX=10116 GN=Vapa PE=1 SV=3	VAPA_RAT	Vapa	0.755	1.75	0.755	1.46	0.964	2.08	1.46	1.75
Long-chain-fatty-acid--CoA ligase 1 OS=Rattus norvegicus OX=10116 GN=Acsl1 PE=1 SV=1	ACSL1_RAT	Acsl1	0.278	0.445	0.445	0.445	0.387	0.387	0.387	0.387
Atlastin-3 OS=Rattus norvegicus OX=10116 GN=Atl3 PE=2 SV=2	ATLA3_RAT	Atl3	0.372	0.301	0.446	0.524	0.694	0.607	0.446	0.524
40S ribosomal protein S15a OS=Rattus norvegicus OX=10116 GN=Rps15a PE=1 SV=2	RS15A_RAT	Rps15a	4.16	2.42	1.27	3.2	3.2	1.79	5.33	3.2
Sarcosine dehydrogenase, mitochondrial OS=Rattus norvegicus OX=10116 GN=Sardh PE=1 SV=2	SARDH_RAT	Sardh	0.0653	0.329	0.248	0.329	0.329	0.416	0.416	0.209
Alpha-soluble NSF attachment protein OS=Rattus norvegicus OX=10116 GN=Napa PE=1 SV=2	SNAA_RAT	Napa	1.35	2.12	0.943	1.14	0.329	1.14	1.58	1.35
3-ketoacyl-CoA thiolase, mitochondrial OS=Rattus norvegicus OX=10116 GN=Acaa2 PE=2 SV=1	THIM_RAT	Acaa2	0.976	2.11	1.48	1.88	0.698	1.88	0.976	1.88
Mitochondrial import receptor subunit TOM70 OS=Rattus norvegicus OX=10116 GN=Tomm70 PE=1 SV=1	TOM70_RAT	Tomm70	0.329	0.461	0.393	0.393	0.393	0.532	0.267	0.267
Filamin-C OS=Rattus norvegicus OX=10116 GN=Flnc PE=1 SV=1	FLNC_RAT	Flnc	0	0.0224	0.0338	0.0224	0.0224	0.0224	0.0454	0.0224
Transcription elongation factor A protein 1 OS=Rattus norvegicus OX=10116 GN=Tcea1 PE=1 SV=1	TCEA1_RAT	Tcea1	1.11	1.11	0.593	1.11	0.918	0.593	1.78	1.11
Isocitrate dehydrogenase [NAD] subunit beta, mitochondrial OS=Rattus norvegicus OX=10116 GN=Idh3B PE=2 SV=1	IDH3B_RAT	Idh3B	0.454	0.821	0.454	0.962	0.689	0.821	0.689	0.567
N-acylneuraminate cytidylyltransferase OS=Rattus norvegicus OX=10116 GN=Cmas PE=2 SV=1	NEUA_RAT	Cmas	0.302	0.696	0.588	0.696	0.486	0.486	0.588	0.219
Peroxiredoxin-5, mitochondrial OS=Rattus norvegicus OX=10116 GN=Prdx5 PE=1 SV=1	PRDX5_RAT	Prdx5	3.67	3.06	5.17	2.07	2.53	3.06	2.53	3.06
UV excision repair protein RAD23 homolog B OS=Rattus norvegicus OX=10116 GN=Rad23b PE=1 SV=1	RD23B_RAT	Rad23b	0.665	0.548	0.548	0.926	0.926	0.791	0.665	0.791
60S ribosomal protein L17 OS=Rattus norvegicus OX=10116 GN=Rpl17 PE=2 SV=3	RL17_RAT	Rpl17	3.26	2.19	3.92	2.68	3.26	2.68	2.68	2.68
40S ribosomal protein S14 OS=Rattus norvegicus OX=10116 GN=Rps14 PE=2 SV=3	RS14_RAT	Rps14	5.62	3.54	4.48	3.54	5.62	3.54	7	3.54
Lysosome membrane protein 2 OS=Rattus norvegicus OX=10116 GN=Scarb2 PE=1 SV=2	SCRB2_RAT	Scarb2	0.424	0.342	0.51	0.342	0.51	0.342	0.424	0.193
Guanine nucleotide-binding protein G(o) subunit alpha OS=Rattus norvegicus OX=10116 GN=Gnao1 PE=1 SV=2	GNAO_RAT	Gnao1	1.58	1.79	1.04	1.79	1.04	1.04	1.2	1.79
Ubiquitin thioesterase OTUB1 OS=Rattus norvegicus OX=10116 GN=Otub1 PE=1 SV=1	OTUB1_RAT	Otub1	1.47	1.73	1.47	2.02	1.23	2.34	2.02	2.34
Septin-7 OS=Rattus norvegicus OX=10116 GN=Sept7 PE=1 SV=1	SEPT7_RAT	2007-09-01	0.286	0.654	0.37	0.554	0.459	0.554	0.37	0.37
Mitochondrial import inner membrane translocase subunit TIM44 OS=Rattus norvegicus OX=10116 GN=Timm44 PE=1 SV=1	TIM44_RAT	Timm44	0.453	0.751	0.453	0.453	0.453	0.283	0.453	0.205
Cell division control protein 42 homolog OS=Rattus norvegicus OX=10116 GN=Cdc42 PE=1 SV=2	CDC42_RAT	Cdc42	1.08	1.08	1.41	1.08	1.08	0.796	0.796	1.79
ADP-ribosylation factor-like protein 1 OS=Rattus norvegicus OX=10116 GN=Arl1 PE=1 SV=1	ARL1_RAT	Arl1	2.37	1.13	1.48	1.48	1.48	1.13	1.89	0.834
Dihydrolipoyl dehydrogenase, mitochondrial OS=Rattus norvegicus OX=10116 GN=Dld PE=1 SV=1	DLDH_RAT	Dld	0.342	0.51	0.424	0.601	0.601	0.699	0.424	0.51
Succinate--CoA ligase [ADP/GDP-forming] subunit alpha, mitochondrial OS=Rattus norvegicus OX=10116 GN=Suclg1 PE=2 SV=2	SUCA_RAT	Suclg1	1.62	1.01	0.69	1.2	0.3	0.3	0.845	1.01
Ubiquilin-1 OS=Rattus norvegicus OX=10116 GN=Ubqln1 PE=1 SV=1	UBQL1_RAT	Ubqln1	0.361	0.293	0.672	0.433	0.509	0.76	0.167	0.228
Rho GTPase-activating protein 35 OS=Rattus norvegicus OX=10116 GN=Arhgap35 PE=1 SV=3	RHG35_RAT	Arhgap35	0.12	0.099	0.12	0.0583	0.163	0.0785	0.0385	0.0583
Ras-related protein Rab-11A OS=Rattus norvegicus OX=10116 GN=Rab11a PE=1 SV=3	RB11A_RAT	Rab11a	3.63	2.16	2.16	2.16	3.63	3.08	2.16	3.08
Sec1 family domain-containing protein 1 OS=Rattus norvegicus OX=10116 GN=Scfd1 PE=1 SV=1	SCFD1_RAT	Scfd1	0.193	0.193	0.193	0.247	0.363	0.247	0.247	0.193
Brain acid soluble protein 1 OS=Rattus norvegicus OX=10116 GN=Basp1 PE=1 SV=2	BASP1_RAT	Basp1	2.13	3.17	2.13	2.13	1.72	2.61	2.13	1.72
Hsp90 co-chaperone Cdc37 OS=Rattus norvegicus OX=10116 GN=Cdc37 PE=1 SV=2	CDC37_RAT	Cdc37	0.238	0.533	0.768	0.533	0.647	0.647	0.647	0.428
Eukaryotic peptide chain release factor subunit 1 OS=Rattus norvegicus OX=10116 GN=Etf1 PE=2 SV=3	ERF1_RAT	Etf1	0.383	0.793	0.793	1.18	0.793	1.18	0.681	0.681
Leucine-rich repeat-containing protein 59 OS=Rattus norvegicus OX=10116 GN=Lrrc59 PE=1 SV=1	LRC59_RAT	Lrrc59	1.26	0.436	0.312	0.312	0.198	0.312	0.436	0.436
Arfaptin-1 OS=Rattus norvegicus OX=10116 GN=Arfip1 PE=1 SV=1	ARFP1_RAT	Arfip1	0	0.594	0.475	0.364	0.594	0.262	0.262	0.168
Endothelin-converting enzyme 1 OS=Rattus norvegicus OX=10116 GN=Ece1 PE=1 SV=2	ECE1_RAT	Ece1	0.25	0.347	0.298	0.398	0.347	0.25	0.25	0.298
Neuronal migration protein doublecortin OS=Rattus norvegicus OX=10116 GN=Dcx PE=1 SV=2	DCX_RAT	Dcx	0.478	0.598	0.367	1.02	0.598	1.02	1.02	0.728
Glyoxalase domain-containing protein 4 OS=Rattus norvegicus OX=10116 GN=Glod4 PE=1 SV=1	GLOD4_RAT	Glod4	2.76	2.42	0.328	1.34	0.939	1.83	2.76	2.11
Prothymosin alpha OS=Rattus norvegicus OX=10116 GN=Ptma PE=1 SV=2	PTMA_RAT	Ptma	13.7	13.7	10.5	13.7	8.04	10.5	13.7	6.08
Cytochrome c oxidase subunit 2 OS=Rattus norvegicus OX=10116 GN=Mtco2 PE=1 SV=3	COX2_RAT	Mtco2	1.33	0.622	1.07	0.83	1.33	0.83	1.07	0.83
Cleavage and polyadenylation specificity factor subunit 5 OS=Rattus norvegicus OX=10116 GN=Nudt21 PE=2 SV=1	CPSF5_RAT	Nudt21	2.3	1.05	1.31	2.3	1.31	1.05	1.6	2.3
Adenylate kinase 2, mitochondrial OS=Rattus norvegicus OX=10116 GN=Ak2 PE=2 SV=2	KAD2_RAT	Ak2	1.9	1.03	1.9	1.9	1.29	1.29	1.9	2.27
Prolyl endopeptidase OS=Rattus norvegicus OX=10116 GN=Prep PE=1 SV=1	PPCE_RAT	Prep	0.487	0.487	0.429	0.429	0.487	0.487	0.32	0.219
Peroxiredoxin-2 OS=Rattus norvegicus OX=10116 GN=Prdx2 PE=1 SV=3	PRDX2_RAT	Prdx2	2.61	1.36	2.13	2.13	2.13	2.13	2.61	2.13
Tyrosine-protein phosphatase non-receptor type 11 OS=Rattus norvegicus OX=10116 GN=Ptpn11 PE=1 SV=4	PTN11_RAT	Ptpn11	0.263	0.205	0.0979	0.205	0.263	0.263	0.323	0.205
40S ribosomal protein S13 OS=Rattus norvegicus OX=10116 GN=Rps13 PE=1 SV=2	RS13_RAT	Rps13	3.18	1.44	1.92	1.04	1.04	1.04	1.92	1.44
Cortactin-binding protein 2 OS=Rattus norvegicus OX=10116 GN=Cttnbp2 PE=1 SV=1	CTTB2_RAT	Cttnbp2	0	0.0367	0.0367	0	0	0	0	0
Kinesin-like protein KIF2A OS=Rattus norvegicus OX=10116 GN=Kif2a PE=1 SV=2	KIF2A_RAT	Kif2a	0.174	0.222	0.379	0.324	0.222	0.174	0.174	0.174
Nuclear migration protein nudC OS=Rattus norvegicus OX=10116 GN=Nudc PE=1 SV=1	NUDC_RAT	Nudc	0.39	1.1	0.639	1.28	0.932	1.1	0.779	0.779
Septin-11 OS=Rattus norvegicus OX=10116 GN=Sept11 PE=1 SV=1	SEP11_RAT	2011-09-01	0.377	0.212	0.566	0.292	0.669	0.669	0.377	0.292
WD repeat-containing protein 7 OS=Rattus norvegicus OX=10116 GN=Wdr7 PE=1 SV=1	WDR7_RAT	Wdr7	0.0821	0.061	0.0821	0.061	0.061	0.061	0.0403	0.0821
Ectonucleotide pyrophosphatase/phosphodiesterase family member 2 OS=Rattus norvegicus OX=10116 GN=Enpp2 PE=1 SV=2	ENPP2_RAT	Enpp2	0.0994	0.0994	0	0.0652	0.0994	0.0652	0.135	0.0994
Arginase-1 OS=Rattus norvegicus OX=10116 GN=Arg1 PE=1 SV=2	ARGI1_RAT	Arg1	1.25	1.46	1.7	1.46	1.06	1.7	1.95	1.46
Electron transfer flavoprotein subunit alpha, mitochondrial OS=Rattus norvegicus OX=10116 GN=Etfa PE=1 SV=4	ETFA_RAT	Etfa	1.95	1.06	1.25	0.88	0.57	1.7	1.46	1.06
60S ribosomal protein L19 OS=Rattus norvegicus OX=10116 GN=Rpl19 PE=1 SV=1	RL19_RAT	Rpl19	1.22	1.54	0.944	0.944	0.702	0.944	0.944	1.54
RuvB-like 1 OS=Rattus norvegicus OX=10116 GN=Ruvbl1 PE=1 SV=1	RUVB1_RAT	Ruvbl1	0.462	0.66	0.66	0.462	0.768	0.768	0.462	0.884
Metastasis-associated protein MTA1 OS=Rattus norvegicus OX=10116 GN=Mta1 PE=1 SV=1	MTA1_RAT	Mta1	0.223	0.175	0.38	0	0.558	0.223	0.175	0.129
Vacuolar protein sorting-associated protein 45 OS=Rattus norvegicus OX=10116 GN=Vps45 PE=1 SV=1	VPS45_RAT	Vps45	0	0.103	0.103	0.218	0.159	0.411	0.159	0.159
Eukaryotic translation initiation factor 3 subunit I OS=Rattus norvegicus OX=10116 GN=Eif3i PE=2 SV=1	EIF3I_RAT	Eif3i	1.18	1.38	1.6	1.18	1.18	1.18	1.18	1.83
LIM and SH3 domain protein 1 OS=Rattus norvegicus OX=10116 GN=Lasp1 PE=1 SV=1	LASP1_RAT	Lasp1	0.369	0.689	0.689	1.08	0.689	0.689	0.875	0.875
Ubiquitin-conjugating enzyme E2 N OS=Rattus norvegicus OX=10116 GN=Ube2n PE=1 SV=1	UBE2N_RAT	Ube2n	6.22	1.46	3.21	3.21	4.04	4.04	3.21	4.04
Voltage-dependent calcium channel subunit alpha-2/delta-1 OS=Rattus norvegicus OX=10116 GN=Cacna2d1 PE=1 SV=1	CA2D1_RAT	Cacna2d1	0.296	0.263	0.139	0.168	0.081	0.139	0.168	0.109
Nucleolar protein 58 OS=Rattus norvegicus OX=10116 GN=Nop58 PE=1 SV=1	NOP58_RAT	Nop58	0.304	0.612	0.612	0.529	1.1	1.1	0.304	0.304
RNA-binding protein 10 OS=Rattus norvegicus OX=10116 GN=Rbm10 PE=1 SV=1	RBM10_RAT	Rbm10	0.107	0.185	0.0703	0.107	0.107	0.268	0.146	0.185
60S acidic ribosomal protein P2 OS=Rattus norvegicus OX=10116 GN=Rplp2 PE=1 SV=2	RLA2_RAT	Rplp2	6.85	6.85	16	12.1	6.85	6.85	6.85	9.16
DNA replication ATP-dependent helicase/nuclease DNA2 OS=Rattus norvegicus OX=10116 GN=Dna2 PE=3 SV=1	DNA2_RAT	Dna2	0	0	0	0	0	0	0	0.0552
Obg-like ATPase 1 OS=Rattus norvegicus OX=10116 GN=Ola1 PE=2 SV=1	OLA1_RAT	Ola1	0.238	1.04	1.04	1.19	0.899	0.768	1.04	1.04
Phosphatidylinositol-binding clathrin assembly protein OS=Rattus norvegicus OX=10116 GN=Picalm PE=1 SV=1	PICAL_RAT	Picalm	0.319	0.319	0.0966	0.259	0.319	0.259	0.148	0.259
Synaptic vesicle glycoprotein 2A OS=Rattus norvegicus OX=10116 GN=Sv2a PE=1 SV=2	SV2A_RAT	Sv2a	0.262	0.363	0.214	0.363	0.214	0.214	0.312	0.214
Nck-associated protein 1 OS=Rattus norvegicus OX=10116 GN=Nckap1 PE=2 SV=1	NCKP1_RAT	Nckap1	0.133	0.0777	0	0.0512	0.133	0.161	0.0512	0.0777
60S ribosomal protein L27a OS=Rattus norvegicus OX=10116 GN=Rpl27a PE=1 SV=3	RL27A_RAT	Rpl27a	1.51	1.51	1.51	1.09	1.09	1.51	1.09	1.09
Serine-threonine kinase receptor-associated protein OS=Rattus norvegicus OX=10116 GN=Strap PE=1 SV=1	STRAP_RAT	Strap	1.47	1.28	0.639	1.28	0.932	0.932	1.68	1.1
Threonine--tRNA ligase, cytoplasmic OS=Rattus norvegicus OX=10116 GN=Tars PE=1 SV=1	SYTC_RAT	Tars	0.43	0.321	0.374	0.269	0.488	0.269	0.172	0.374
Golgi apparatus protein 1 OS=Rattus norvegicus OX=10116 GN=Glg1 PE=1 SV=1	GSLG1_RAT	Glg1	0.128	0.0749	0	0.101	0	0.0749	0.0749	0.0493
Gelsolin OS=Rattus norvegicus OX=10116 GN=Gsn PE=1 SV=1	GELS_RAT	Gsn	0.25	0.347	0.451	0.298	0.298	0.205	0.205	0.205
Protein O-GlcNAcase OS=Rattus norvegicus OX=10116 GN=Mgea5 PE=1 SV=1	OGA_RAT	Mgea5	0.206	0.244	0.169	0.244	0.206	0.206	0.244	0.206
60S ribosomal protein L11 OS=Rattus norvegicus OX=10116 GN=Rpl11 PE=1 SV=2	RL11_RAT	Rpl11	2.41	1.15	1.15	1.51	1.51	1.15	1.15	0.846
Phenylalanine--tRNA ligase alpha subunit OS=Rattus norvegicus OX=10116 GN=Farsa PE=1 SV=1	SYFA_RAT	Farsa	0.318	0.318	0.393	0.393	0.247	0.318	0.318	0.318
10 kDa heat shock protein, mitochondrial OS=Rattus norvegicus OX=10116 GN=Hspe1 PE=1 SV=3	CH10_RAT	Hspe1	7.99	5.83	5.83	7.99	2.95	10.8	7.99	7.99
Hsc70-interacting protein OS=Rattus norvegicus OX=10116 GN=St13 PE=1 SV=1	F10A1_RAT	St13	0.467	0.71	0.584	0.584	0.584	0.584	0.259	0.467
Alpha-adducin OS=Rattus norvegicus OX=10116 GN=Add1 PE=1 SV=2	ADDA_RAT	Add1	0.083	0.127	0.083	0.173	0.221	0.173	0.083	0.127
Phosphofurin acidic cluster sorting protein 1 OS=Rattus norvegicus OX=10116 GN=Pacs1 PE=1 SV=1	PACS1_RAT	Pacs1	0.13	0.0632	0.0632	0	0.202	0.0632	0.0963	0.0632
Neurosecretory protein VGF OS=Rattus norvegicus OX=10116 GN=Vgf PE=1 SV=3	VGF_RAT	Vgf	0.206	0.455	0.598	0.388	0.264	0.388	0.206	0.206
Progressive ankylosis protein homolog OS=Rattus norvegicus OX=10116 GN=Ankh PE=2 SV=1	ANKH_RAT	Ankh	0.264	0.695	0.192	0.422	0.422	0.422	0.341	0.264
Phosphoribosyl pyrophosphate synthase-associated protein 2 OS=Rattus norvegicus OX=10116 GN=Prpsap2 PE=1 SV=1	KPRB_RAT	Prpsap2	0.72	0.592	0.473	0.473	0.262	0.473	0.473	0.592
Phosphatidylinositol transfer protein alpha isoform OS=Rattus norvegicus OX=10116 GN=Pitpna PE=1 SV=2	PIPNA_RAT	Pitpna	1.2	0.996	0.638	0.809	0.638	0.638	0.638	0.484
Tubulin beta-3 chain OS=Rattus norvegicus OX=10116 GN=Tubb3 PE=1 SV=1	TBB3_RAT	Tubb3	8.09	7.54	9.31	6.52	11.5	8.68	7.54	6.06
Prolyl endopeptidase-like OS=Rattus norvegicus OX=10116 GN=Prepl PE=1 SV=2	PPCEL_RAT	Prepl	0.166	0.211	0.122	0.122	0.308	0.122	0	0.0797
Medium-chain specific acyl-CoA dehydrogenase, mitochondrial OS=Rattus norvegicus OX=10116 GN=Acadm PE=1 SV=1	ACADM_RAT	Acadm	0.314	1.12	0.612	0.979	0.506	0.612	1.27	0.612
60S ribosomal protein L12 OS=Rattus norvegicus OX=10116 GN=Rpl12 PE=2 SV=1	RL12_RAT	Rpl12	2.34	0.992	1.81	1.37	1.81	0.992	1.37	1.81
Protein SET OS=Rattus norvegicus OX=10116 GN=Set PE=2 SV=2	SET_RAT	Set	1.13	0.935	0.761	0.935	0.761	0.761	0.935	0.935
Thimet oligopeptidase OS=Rattus norvegicus OX=10116 GN=Thop1 PE=1 SV=4	THOP1_RAT	Thop1	0.386	0.386	0.504	0.444	0.444	0.386	0.331	0.386
Vesicle-associated membrane protein-associated protein B OS=Rattus norvegicus OX=10116 GN=Vapb PE=1 SV=3	VAPB_RAT	Vapb	1.01	0.594	0.418	1.01	1.01	1.54	1.85	1.01
Nuclear receptor coactivator 2 OS=Rattus norvegicus OX=10116 GN=Ncoa2 PE=1 SV=1	NCOA2_RAT	Ncoa2	0	0.0841	0	0.0625	0.0625	0	0.0625	0
ATP-binding cassette sub-family B member 7, mitochondrial OS=Rattus norvegicus OX=10116 GN=Abcb7 PE=1 SV=1	ABCB7_RAT	Abcb7	0.214	0.312	0.123	0.364	0.214	0.214	0.123	0.123
rRNA 2'-O-methyltransferase fibrillarin OS=Rattus norvegicus OX=10116 GN=Fbl PE=1 SV=2	FBRL_RAT	Fbl	1.76	0.586	0.319	0.739	0.586	0.586	0.739	0.586
Nucleosome assembly protein 1-like 1 OS=Rattus norvegicus OX=10116 GN=Nap1l1 PE=1 SV=1	NP1L1_RAT	Nap1l1	0.419	0.633	0.633	0.522	0.419	0.522	0.633	0.633
Transmembrane emp24 domain-containing protein 2 OS=Rattus norvegicus OX=10116 GN=Tmed2 PE=1 SV=1	TMED2_RAT	Tmed2	1.99	0.981	1.27	0.981	1.6	1.6	1.27	0.981
Proteasome subunit beta type-5 OS=Rattus norvegicus OX=10116 GN=Psmb5 PE=1 SV=3	PSB5_RAT	Psmb5	3.66	0.733	1.16	1.16	0.934	1.16	1.16	1.69
GTP-binding protein SAR1b OS=Rattus norvegicus OX=10116 GN=Sar1b PE=2 SV=1	SAR1B_RAT	Sar1b	3	1.64	2.48	1.64	3.6	3	2.48	2.03
Serine/arginine-rich splicing factor 2 OS=Rattus norvegicus OX=10116 GN=Srsf2 PE=1 SV=3	SRSF2_RAT	Srsf2	1.09	1.36	1.67	0.849	0.849	1.09	1.09	1.36
Small nuclear ribonucleoprotein-associated protein N OS=Rattus norvegicus OX=10116 GN=Snrpn PE=2 SV=1	RSMN_RAT	Snrpn	0.462	0.884	0.66	0.66	0.66	0.66	0.884	1.43
Guanine nucleotide-binding protein G(s) subunit alpha isoforms XLas OS=Rattus norvegicus OX=10116 GN=Gnas PE=1 SV=3	GNAS1_RAT	Gnas	0.0816	0.14	0.0537	0.14	0.11	0.14	0.17	0.11
Histone acetyltransferase KAT7 OS=Rattus norvegicus OX=10116 GN=Kat7 PE=1 SV=1	KAT7_RAT	Kat7	0.199	0.199	0.199	0.199	0.254	0.312	0	0.146
Calmodulin-regulated spectrin-associated protein 2 OS=Rattus norvegicus OX=10116 GN=Camsap2 PE=1 SV=1	CAMP2_RAT	Camsap2	0	0	0.0397	0.0397	0	0	0	0
Proteasome subunit alpha type-3 OS=Rattus norvegicus OX=10116 GN=Psma3 PE=1 SV=3	PSA3_RAT	Psma3	2.37	1.7	1.42	2.01	2.01	1.16	1.7	1.42
40S ribosomal protein S25 OS=Rattus norvegicus OX=10116 GN=Rps25 PE=2 SV=1	RS25_RAT	Rps25	3.68	1.42	3.68	0.938	3.68	2.76	3.68	3.68
Ubiquitin carboxyl-terminal hydrolase 15 OS=Rattus norvegicus OX=10116 GN=Usp15 PE=1 SV=1	UBP15_RAT	Usp15	0.125	0.193	0.0921	0.158	0.303	0.125	0.125	0.158
Serine/threonine-protein phosphatase 2A 65 kDa regulatory subunit A beta isoform OS=Rattus norvegicus OX=10116 GN=Ppp2r1b PE=2 SV=1	2AAB_RAT	Ppp2r1b	0	0.274	0.274	0.214	0.337	0.214	0.156	0.214
Inositol monophosphatase 1 OS=Rattus norvegicus OX=10116 GN=Impa1 PE=1 SV=2	IMPA1_RAT	Impa1	1.06	0.673	0.673	0.509	0.362	0.509	0.509	0.673
cAMP-dependent protein kinase type I-beta regulatory subunit OS=Rattus norvegicus OX=10116 GN=Prkar1b PE=2 SV=2	KAP1_RAT	Prkar1b	1.41	0.933	0.796	1.79	1.08	1.41	1.79	1.41
60S ribosomal protein L23a OS=Rattus norvegicus OX=10116 GN=Rpl23a PE=2 SV=1	RL23A_RAT	Rpl23a	2.39	2.39	3.03	3.8	1.01	1.85	3.03	4.72
DNA polymerase delta catalytic subunit OS=Rattus norvegicus OX=10116 GN=Pold1 PE=2 SV=1	DPOD1_RAT	Pold1	0.0534	0.11	0.0534	0.2	0.2	0.169	0.139	0.0811
Phosphatidate cytidylyltransferase 2 OS=Rattus norvegicus OX=10116 GN=Cds2 PE=1 SV=1	CDS2_RAT	Cds2	0.363	0.543	0.281	0.363	0.543	0.363	0.363	0.363
Eukaryotic translation initiation factor 3 subunit G OS=Rattus norvegicus OX=10116 GN=Eif3g PE=1 SV=1	EIF3G_RAT	Eif3g	0.701	1.03	1.42	1.03	0.859	0.859	1.22	1.42
GrpE protein homolog 1, mitochondrial OS=Rattus norvegicus OX=10116 GN=Grpel1 PE=1 SV=2	GRPE1_RAT	Grpel1	1.46	0.671	1.46	1.46	1.46	1.46	1.46	1.79
Protein phosphatase 1G OS=Rattus norvegicus OX=10116 GN=Ppm1g PE=1 SV=2	PPM1G_RAT	Ppm1g	0.462	0.63	0.72	0.63	1.26	0.63	0.462	0.72
Glucose-6-phosphate 1-dehydrogenase OS=Rattus norvegicus OX=10116 GN=G6pdx PE=1 SV=3	G6PD_RAT	G6pdx	0	0.38	0.308	0.308	0.456	0.38	0.239	0.175
Unconventional myosin-Ic OS=Rattus norvegicus OX=10116 GN=Myo1c PE=1 SV=2	MYO1C_RAT	Myo1c	0.0838	0.206	0	0.175	0.143	0.239	0.206	0.113
Pre-mRNA-splicing factor SYF1 OS=Rattus norvegicus OX=10116 GN=Xab2 PE=2 SV=1	SYF1_RAT	Xab2	0.0663	0.252	0.101	0.101	0.101	0.137	0.101	0.137
E3 UFM1-protein ligase 1 OS=Rattus norvegicus OX=10116 GN=Ufl1 PE=1 SV=1	UFL1_RAT	Ufl1	0.113	0.284	0.239	0.284	0.196	0.0741	0.113	0.0741
U4/U6.U5 tri-snRNP-associated protein 1 OS=Rattus norvegicus OX=10116 GN=Sart1 PE=1 SV=1	SNUT1_RAT	Sart1	0.073	0.151	0	0.151	0.073	0.193	0.112	0.073
UPF0505 protein C16orf62 homolog OS=Rattus norvegicus OX=10116 PE=2 SV=1	CP062_RAT		0.0623	0.0949	0	0.0949	0.129	0.0949	0	0.0949
Aminopeptidase B OS=Rattus norvegicus OX=10116 GN=Rnpep PE=1 SV=2	AMPB_RAT	Rnpep	0.302	0.302	0.422	0.302	0.422	0.422	0.246	0.246
Ectonucleotide pyrophosphatase/phosphodiesterase family member 5 OS=Rattus norvegicus OX=10116 GN=Enpp5 PE=1 SV=2	ENPP5_RAT	Enpp5	0.264	0.341	0.507	0.507	0.264	0.422	0.264	0.422
NADH dehydrogenase [ubiquinone] 1 alpha subcomplex subunit 10, mitochondrial OS=Rattus norvegicus OX=10116 GN=Ndufa10 PE=1 SV=1	NDUAA_RAT	Ndufa10	0.868	0.598	0.598	0.598	0.728	0.868	0.598	0.478
Serine/threonine-protein kinase WNK1 OS=Rattus norvegicus OX=10116 GN=Wnk1 PE=1 SV=2	WNK1_RAT	Wnk1	0	0.0291	0.059	0.059	0.0439	0.0439	0.0439	0.0439
Putative sodium-coupled neutral amino acid transporter 10 OS=Rattus norvegicus OX=10116 GN=Slc38a10 PE=1 SV=2	S38AA_RAT	Slc38a10	0	0.0556	0.0556	0	0	0	0.0556	0.0845
E3 ubiquitin-protein ligase BRE1B OS=Rattus norvegicus OX=10116 GN=Rnf40 PE=1 SV=1	BRE1B_RAT	Rnf40	0	0	0	0.058	0.058	0.058	0	0
DNA-directed RNA polymerase I subunit RPA2 OS=Rattus norvegicus OX=10116 GN=Polr1b PE=1 SV=1	RPA2_RAT	Polr1b	0	0.0516	0	0	0	0.0516	0	0
Intersectin-1 OS=Rattus norvegicus OX=10116 GN=Itsn1 PE=1 SV=1	ITSN1_RAT	Itsn1	0.048	0	0.048	0	0	0	0	0
Proteasome subunit beta type-7 OS=Rattus norvegicus OX=10116 GN=Psmb7 PE=1 SV=1	PSB7_RAT	Psmb7	1.86	1.32	0.879	0.879	2.18	1.32	1.09	1.09
Ubiquitin-conjugating enzyme E2 variant 2 OS=Rattus norvegicus OX=10116 GN=Ube2v2 PE=1 SV=3	UB2V2_RAT	Ube2v2	4.42	2.72	4.42	1.56	3.49	3.49	5.54	4.42
60S ribosomal protein L28 OS=Rattus norvegicus OX=10116 GN=Rpl28 PE=1 SV=4	RL28_RAT	Rpl28	1.16	1.16	1.16	0.471	0.783	0	1.16	1.16
Ribonucleoprotein PTB-binding 1 OS=Rattus norvegicus OX=10116 GN=Raver1 PE=1 SV=1	RAVR1_RAT	Raver1	0.438	0.274	0.381	0.326	0.326	0.497	0.0841	0.129
Nestin OS=Rattus norvegicus OX=10116 GN=Nes PE=1 SV=2	NEST_RAT	Nes	0.0314	0	0	0	0	0	0	0
Cytochrome c oxidase subunit 4 isoform 1, mitochondrial OS=Rattus norvegicus OX=10116 GN=Cox4i1 PE=1 SV=1	COX41_RAT	Cox4i1	3.16	2.55	2.03	2.03	1.21	2.03	2.55	3.16
Interferon-inducible double-stranded RNA-dependent protein kinase activator A OS=Rattus norvegicus OX=10116 GN=Prkra PE=1 SV=1	PRKRA_RAT	Prkra	0.583	0.736	0.317	0.583	0.444	0.202	0.903	0.583
Proteasome subunit beta type-2 OS=Rattus norvegicus OX=10116 GN=Psmb2 PE=1 SV=1	PSB2_RAT	Psmb2	3.47	0.975	2.4	0.724	2.4	2.4	2.4	1.59
Pumilio homolog 3 OS=Rattus norvegicus OX=10116 GN=Pum3 PE=2 SV=1	PUM3_RAT	Pum3	0	0.141	0	0	0	0.0919	0	0
Leukotriene A-4 hydrolase OS=Rattus norvegicus OX=10116 GN=Lta4h PE=2 SV=2	LKHA4_RAT	Lta4h	0.203	0.319	0.447	0.382	0.447	0.447	0.26	0.203
Sorting nexin-5 OS=Rattus norvegicus OX=10116 GN=Snx5 PE=1 SV=1	SNX5_RAT	Snx5	0.312	0.609	0.972	1.26	0.226	0.843	0.503	0.404
Signal recognition particle receptor subunit beta OS=Rattus norvegicus OX=10116 GN=Srprb PE=2 SV=1	SRPRB_RAT	Srprb	2.22	0.702	0.702	1.1	1.34	1.9	1.6	1.9
Translocon-associated protein subunit delta OS=Rattus norvegicus OX=10116 GN=Ssr4 PE=2 SV=1	SSRD_RAT	Ssr4	2.67	1.65	1.26	1.65	1.26	1.26	1.65	1.26
F-actin-capping protein subunit beta OS=Rattus norvegicus OX=10116 GN=Capzb PE=1 SV=1	CAPZB_RAT	Capzb	1.79	1.52	0.507	1.27	0.228	1.05	1.05	0.85
WW domain-binding protein 11 OS=Rattus norvegicus OX=10116 GN=Wbp11 PE=1 SV=1	WBP11_RAT	Wbp11	0.0956	0	0.377	0	0.0956	0.0956	0.0956	0.147
Zinc finger CCCH-type antiviral protein 1 OS=Rattus norvegicus OX=10116 GN=Zc3hav1 PE=1 SV=1	ZCCHV_RAT	Zc3hav1	0.0767	0	0	0.117	0	0.0767	0	0.117
Rho guanine nucleotide exchange factor 1 OS=Rattus norvegicus OX=10116 GN=Arhgef1 PE=2 SV=1	ARHG1_RAT	Arhgef1	0.133	0.284	0.0645	0.284	0.325	0.206	0.206	0.206
ADP-ribosylation factor-like protein 8B OS=Rattus norvegicus OX=10116 GN=Arl8b PE=2 SV=1	ARL8B_RAT	Arl8b	2.17	1.38	1.06	0.78	1.74	1.74	1.38	1.74
Interleukin enhancer-binding factor 2 OS=Rattus norvegicus OX=10116 GN=Ilf2 PE=2 SV=1	ILF2_RAT	Ilf2	0.64	0.542	0.542	0.745	0.542	1.1	0.745	0.745
Acetyl-CoA acetyltransferase, cytosolic OS=Rattus norvegicus OX=10116 GN=Acat2 PE=1 SV=1	THIC_RAT	Acat2	0.588	0.588	0.26	1	0.26	0.588	0.361	0.26
Rho guanine nucleotide exchange factor 11 OS=Rattus norvegicus OX=10116 GN=Arhgef11 PE=1 SV=1	ARHGB_RAT	Arhgef11	0	0.059	0.039	0.1	0	0	0.059	0.039
Fidgetin-like protein 1 OS=Rattus norvegicus OX=10116 GN=Fignl1 PE=2 SV=1	FIGL1_RAT	Fignl1	0.09	0	0.09	0.09	0.09	0	0	0
Tumor protein D54 OS=Rattus norvegicus OX=10116 GN=Tpd52l2 PE=1 SV=1	TPD54_RAT	Tpd52l2	1.83	2.67	1.18	2.22	1.48	1.83	1.48	1.48
Serine/threonine-protein phosphatase 2B catalytic subunit alpha isoform OS=Rattus norvegicus OX=10116 GN=Ppp3ca PE=1 SV=1	PP2BA_RAT	Ppp3ca	0.177	0.312	0.115	0.243	0.177	0.177	0.177	0.177
COP9 signalosome complex subunit 3 OS=Rattus norvegicus OX=10116 GN=Cops3 PE=1 SV=1	CSN3_RAT	Cops3	0.304	0.701	0.304	0.701	0.22	0.394	0.701	0.489
1-phosphatidylinositol 4,5-bisphosphate phosphodiesterase beta-1 OS=Rattus norvegicus OX=10116 GN=Plcb1 PE=1 SV=1	PLCB1_RAT	Plcb1	0.0476	0	0	0	0.0722	0	0	0
CAP-Gly domain-containing linker protein 2 OS=Rattus norvegicus OX=10116 GN=Clip2 PE=1 SV=1	CLIP2_RAT	Clip2	0.0572	0	0	0	0	0.0572	0.087	0
DNA ligase 1 OS=Rattus norvegicus OX=10116 GN=Lig1 PE=1 SV=1	DNLI1_RAT	Lig1	0.245	0.0985	0.207	0.133	0.169	0.169	0.0985	0.0985
Guanine nucleotide-binding protein G(i) subunit alpha-2 OS=Rattus norvegicus OX=10116 GN=Gnai2 PE=1 SV=3	GNAI2_RAT	Gnai2	1.02	2.23	0.868	1.55	1.02	0.868	1.18	0.868
GTP-binding protein 1 OS=Rattus norvegicus OX=10116 GN=Gtpbp1 PE=1 SV=1	GTPB1_RAT	Gtpbp1	0.193	0.247	0.303	0.247	0.247	0.303	0.193	0.247
N-terminal kinase-like protein OS=Rattus norvegicus OX=10116 GN=Scyl1 PE=2 SV=1	SCYL1_RAT	Scyl1	0.155	0.155	0.0746	0.114	0.197	0.286	0.155	0.155
Rho family-interacting cell polarization regulator 2 OS=Rattus norvegicus OX=10116 GN=Ripor2 PE=1 SV=1	RIPR2_RAT	Ripor2	0.195	0.143	0.143	0.0455	0.118	0.093	0	0
Adenine phosphoribosyltransferase OS=Rattus norvegicus OX=10116 GN=Aprt PE=1 SV=1	APT_RAT	Aprt	2.55	2.03	1.58	1.58	2.03	2.55	1.58	2.55
Transcriptional activator protein Pur-beta OS=Rattus norvegicus OX=10116 GN=Purb PE=1 SV=3	PURB_RAT	Purb	0.761	0.602	0.458	0.761	0.602	0.761	0.935	0.602
Succinate dehydrogenase [ubiquinone] iron-sulfur subunit, mitochondrial OS=Rattus norvegicus OX=10116 GN=Sdhb PE=2 SV=2	SDHB_RAT	Sdhb	0.484	0.638	0.345	0.484	0.345	0.345	0.638	0.484
Src substrate cortactin OS=Rattus norvegicus OX=10116 GN=Cttn PE=1 SV=1	SRC8_RAT	Cttn	0.251	0.399	0.564	0.399	0.479	0.399	0.251	0.323
Putative ATP-dependent RNA helicase DHX30 OS=Rattus norvegicus OX=10116 GN=Dhx30 PE=1 SV=1	DHX30_RAT	Dhx30	0.101	0.0492	0.0747	0.101	0.101	0.101	0.0747	0.101
CLIP-associating protein 2 OS=Rattus norvegicus OX=10116 GN=Clasp2 PE=1 SV=1	CLAP2_RAT	Clasp2	0.071	0.0468	0	0.071	0.071	0	0	0
Microtubule-associated protein 2 OS=Rattus norvegicus OX=10116 GN=Map2 PE=1 SV=3	MTAP2_RAT	Map2	0	0	0	0	0	0	0.0324	0
Nuclear pore complex protein Nup98-Nup96 OS=Rattus norvegicus OX=10116 GN=Nup98 PE=1 SV=2	NUP98_RAT	Nup98	0.121	0.14	0.0851	0.14	0.103	0.0851	0.103	0.0851
Ethylmalonyl-CoA decarboxylase OS=Rattus norvegicus OX=10116 GN=Echdc1 PE=1 SV=1	ECHD1_RAT	Echdc1	1.16	0.964	0.336	0.62	0.336	0.964	1.16	0.784
S-adenosylhomocysteine hydrolase-like protein 1 OS=Rattus norvegicus OX=10116 GN=Ahcyl1 PE=1 SV=2	SAHH2_RAT	Ahcyl1	0.345	0.427	0.427	0.345	0.267	0.427	0.194	0.194
Serum albumin OS=Rattus norvegicus OX=10116 GN=Alb PE=1 SV=2	ALBU_RAT	Alb	0.262	0.204	0.15	0.204	0.45	0.15	0.204	0.204
Superoxide dismutase [Mn], mitochondrial OS=Rattus norvegicus OX=10116 GN=Sod2 PE=1 SV=2	SODM_RAT	Sod2	1.75	0.66	1.75	1.43	0.884	0.66	1.14	1.75
Melanoma-associated antigen D1 OS=Rattus norvegicus OX=10116 GN=Maged1 PE=1 SV=3	MAGD1_RAT	Maged1	0.161	0	0	0.119	0	0.0776	0.119	0.0776
Aspartate aminotransferase, cytoplasmic OS=Rattus norvegicus OX=10116 GN=Got1 PE=1 SV=3	AATC_RAT	Got1	0.982	0.614	0.507	0.614	0.728	0.728	0.728	0.728
Cytosol aminopeptidase OS=Rattus norvegicus OX=10116 GN=Lap3 PE=1 SV=1	AMPL_RAT	Lap3	0.405	0.405	0.328	0.255	0.405	0.185	0.255	0.255
COP9 signalosome complex subunit 4 OS=Rattus norvegicus OX=10116 GN=Cops4 PE=1 SV=1	CSN4_RAT	Cops4	0.147	0.409	0.316	0.509	0.316	0.509	0.316	0.316
Macrophage migration inhibitory factor OS=Rattus norvegicus OX=10116 GN=Mif PE=1 SV=4	MIF_RAT	Mif	7.87	3.29	1.64	3.29	3.29	1.64	5.96	7.87
60S ribosomal protein L23 OS=Rattus norvegicus OX=10116 GN=Rpl23 PE=2 SV=1	RL23_RAT	Rpl23	3.2	2.42	1.79	3.2	1.79	1.27	1.27	3.2
40S ribosomal protein S12 OS=Rattus norvegicus OX=10116 GN=Rps12 PE=1 SV=2	RS12_RAT	Rps12	2.51	2.51	1.85	1.85	1.85	1.85	1.85	1.85
Integrin beta-1 OS=Rattus norvegicus OX=10116 GN=Itgb1 PE=2 SV=1	ITB1_RAT	Itgb1	0	0.156	0.156	0.115	0.243	0.288	0.115	0.156
Receptor-type tyrosine-protein phosphatase F OS=Rattus norvegicus OX=10116 GN=Ptprf PE=2 SV=1	PTPRF_RAT	Ptprf	0.0792	0	0	0	0	0	0	0
Proteasome subunit alpha type-5 OS=Rattus norvegicus OX=10116 GN=Psma5 PE=1 SV=1	PSA5_RAT	Psma5	1.58	0.606	1.29	1.03	1.9	1.29	1.29	1.29
Proteasome subunit beta type-3 OS=Rattus norvegicus OX=10116 GN=Psmb3 PE=1 SV=1	PSB3_RAT	Psmb3	1.96	0.719	0.969	0.719	0.969	1.96	0.969	1.25
Sepiapterin reductase OS=Rattus norvegicus OX=10116 GN=Spr PE=1 SV=1	SPRE_RAT	Spr	1.73	0.747	0.563	0.954	1.18	1.18	1.18	1.73
Histidine triad nucleotide-binding protein 1 OS=Rattus norvegicus OX=10116 GN=Hint1 PE=1 SV=5	HINT1_RAT	Hint1	2.01	0.938	1.42	0.938	0	2.76	2.76	0.938
Neogenin (Fragment) OS=Rattus norvegicus OX=10116 GN=Neo1 PE=1 SV=1	NEO1_RAT	Neo1	0	0	0.0662	0	0.0437	0	0.0662	0.0437
Apoptosis-inducing factor 1, mitochondrial OS=Rattus norvegicus OX=10116 GN=Aifm1 PE=1 SV=1	AIFM1_RAT	Aifm1	0.1	0.398	0.27	0.154	0.333	0.1	0.211	0.1
Ubiquitin conjugation factor E4 A OS=Rattus norvegicus OX=10116 GN=Ube4a PE=2 SV=1	UBE4A_RAT	Ube4a	0	0.0819	0	0.111	0.0819	0.0819	0.0819	0.111
Transmembrane emp24 domain-containing protein 10 OS=Rattus norvegicus OX=10116 GN=Tmed10 PE=1 SV=2	TMEDA_RAT	Tmed10	2.1	0.873	1.73	1.12	2.1	2.1	1.73	2.1
Dihydropyrimidinase-related protein 3 OS=Rattus norvegicus OX=10116 GN=Dpysl3 PE=1 SV=2	DPYL3_RAT	Dpysl3	0.362	0.434	0.589	0.434	1.06	0.673	0.434	0.362
Lysosome-associated membrane glycoprotein 2 OS=Rattus norvegicus OX=10116 GN=Lamp2 PE=1 SV=3	LAMP2_RAT	Lamp2	0.324	0.324	0.234	0.234	0.324	0.421	0.324	0.234
Superoxide dismutase [Cu-Zn] OS=Rattus norvegicus OX=10116 GN=Sod1 PE=1 SV=2	SODC_RAT	Sod1	1.62	1.62	2.86	2.18	1.62	2.18	2.86	2.18
Peptidyl-glycine alpha-amidating monooxygenase OS=Rattus norvegicus OX=10116 GN=Pam PE=1 SV=1	AMD_RAT	Pam	0	0.0609	0.0609	0	0.125	0.0609	0.0927	0.0609
Adenylate kinase isoenzyme 1 OS=Rattus norvegicus OX=10116 GN=Ak1 PE=1 SV=3	KAD1_RAT	Ak1	3.23	1.38	1.06	2.17	1.74	2.66	2.17	1.74
Tubulin beta-2A chain OS=Rattus norvegicus OX=10116 GN=Tubb2a PE=1 SV=1	TBB2A_RAT	Tubb2a	20.3	15.5	21.7	11.8	21.7	17.8	14.5	11.8
Twinfilin-1 OS=Rattus norvegicus OX=10116 GN=Twf1 PE=1 SV=1	TWF1_RAT	Twf1	0.606	0.881	0.484	0.371	0.606	0.371	0.371	0.606
Sodium/potassium-transporting ATPase subunit beta-1 OS=Rattus norvegicus OX=10116 GN=Atp1b1 PE=1 SV=1	AT1B1_RAT	Atp1b1	0.431	0.565	0.309	0.565	0.309	0.565	0.309	0.565
Heterogeneous nuclear ribonucleoprotein H2 OS=Rattus norvegicus OX=10116 GN=Hnrnph2 PE=1 SV=1	HNRH2_RAT	Hnrnph2	1.03	1.47	1.31	1.63	1.47	1.99	1.31	1.17
COP9 signalosome complex subunit 1 OS=Rattus norvegicus OX=10116 GN=Gps1 PE=1 SV=1	CSN1_RAT	Gps1	0.196	0.196	0	0.127	0	0	0.196	0.127
Coiled-coil domain-containing protein 146 OS=Rattus norvegicus OX=10116 GN=Ccdc146 PE=1 SV=1	CC146_RAT	Ccdc146	0	0	0	0	0	0	0.0576	0
Rap guanine nucleotide exchange factor 2 OS=Rattus norvegicus OX=10116 GN=Rapgef2 PE=1 SV=2	RPGF2_RAT	Rapgef2	0.0395	0	0	0	0.0395	0	0	0
Lactoylglutathione lyase OS=Rattus norvegicus OX=10116 GN=Glo1 PE=1 SV=3	LGUL_RAT	Glo1	1.11	1.11	1.11	1.11	1.45	1.45	0.565	1.45
Microtubule-associated protein 1S OS=Rattus norvegicus OX=10116 GN=Map1s PE=1 SV=1	MAP1S_RAT	Map1s	0.133	0.133	0.0644	0.244	0.133	0.284	0.133	0.169
40S ribosomal protein S24 OS=Rattus norvegicus OX=10116 GN=Rps24 PE=2 SV=1	RS24_RAT	Rps24	4.95	1.69	1.21	1.69	1.21	1.69	2.28	1.69
Beta-catenin-like protein 1 OS=Rattus norvegicus OX=10116 GN=Ctnnbl1 PE=1 SV=1	CTBL1_RAT	Ctnnbl1	0.217	0.159	0.159	0.279	0.217	0.411	0.103	0.103
ADP-ribosylation factor 4 OS=Rattus norvegicus OX=10116 GN=Arf4 PE=2 SV=2	ARF4_RAT	Arf4	7.36	7.36	12.2	10.3	8.73	12.2	10.3	7.36
4F2 cell-surface antigen heavy chain OS=Rattus norvegicus OX=10116 GN=Slc3a2 PE=1 SV=1	4F2_RAT	Slc3a2	0.39	0.245	0.468	0.316	0.39	0.551	0.39	0.245
Ras-related protein Rab-18 OS=Rattus norvegicus OX=10116 GN=Rab18 PE=2 SV=1	RAB18_RAT	Rab18	3.44	1.58	1.96	1.25	2.38	1.58	1.25	1.25
1-acyl-sn-glycerol-3-phosphate acyltransferase delta OS=Rattus norvegicus OX=10116 GN=Agpat4 PE=2 SV=1	PLCD_RAT	Agpat4	0.336	0.661	0.437	0.786	0.336	0.545	0.336	0.243
Protein phosphatase methylesterase 1 OS=Rattus norvegicus OX=10116 GN=Ppme1 PE=1 SV=2	PPME1_RAT	Ppme1	0.162	0.567	0.454	0.454	0.252	0.567	0.454	0.252
Tuftelin-interacting protein 11 OS=Rattus norvegicus OX=10116 GN=Tfip11 PE=1 SV=1	TFP11_RAT	Tfip11	0.105	0	0	0.069	0	0.105	0.105	0
Long-chain specific acyl-CoA dehydrogenase, mitochondrial OS=Rattus norvegicus OX=10116 GN=Acadl PE=1 SV=1	ACADL_RAT	Acadl	0.701	0.394	0.489	0.701	0.22	0.394	0.701	0.701
Heterogeneous nuclear ribonucleoprotein D-like OS=Rattus norvegicus OX=10116 GN=Hnrnpdl PE=1 SV=1	HNRDL_RAT	Hnrnpdl	0.869	0.869	0.709	1.24	0.869	0.709	1.67	1.24
Cysteine desulfurase, mitochondrial OS=Rattus norvegicus OX=10116 GN=Nfs1 PE=2 SV=1	NFS1_RAT	Nfs1	0.21	0.561	0.664	0.561	0.561	0.773	0.374	0.29
NSFL1 cofactor p47 OS=Rattus norvegicus OX=10116 GN=Nsfl1c PE=1 SV=1	NSF1C_RAT	Nsfl1c	0.263	1.75	1.18	1.36	1.02	1.02	1.75	1.55
Protein phosphatase 1 regulatory subunit 7 OS=Rattus norvegicus OX=10116 GN=Ppp1r7 PE=1 SV=1	PP1R7_RAT	Ppp1r7	0.359	0.847	0.71	0.994	0.259	0.467	0.584	0.359
Ribonuclease inhibitor OS=Rattus norvegicus OX=10116 GN=Rnh1 PE=1 SV=2	RINI_RAT	Rnh1	0.29	0.374	0.29	0.465	0.29	0.374	0.29	0.29
Sulfate transporter OS=Rattus norvegicus OX=10116 GN=Slc26a2 PE=2 SV=1	S26A2_RAT	Slc26a2	0.0811	0.169	0.169	0.169	0.0811	0.124	0.169	0.0811
Microtubule-associated protein tau OS=Rattus norvegicus OX=10116 GN=Mapt PE=1 SV=3	TAU_RAT	Mapt	0.0849	0.385	0.0849	0.177	0.177	0.13	0.177	0
Pleiotropic regulator 1 OS=Rattus norvegicus OX=10116 GN=Plrg1 PE=2 SV=1	PLRG1_RAT	Plrg1	0.182	0.477	0.25	0.25	0.118	0.321	0	0.118
Methylglutaconyl-CoA hydratase, mitochondrial OS=Rattus norvegicus OX=10116 GN=Auh PE=1 SV=2	AUHM_RAT	Auh	0.208	0.46	0.46	0.605	0.46	0.328	0.46	0.328
Cytochrome c oxidase subunit 5A, mitochondrial OS=Rattus norvegicus OX=10116 GN=Cox5a PE=1 SV=1	COX5A_RAT	Cox5a	1.59	2.79	2.79	2.79	1.59	1.59	3.58	2.13
Growth arrest-specific protein 6 OS=Rattus norvegicus OX=10116 GN=Gas6 PE=1 SV=1	GAS6_RAT	Gas6	0.187	0.187	0.239	0.187	0.187	0.187	0.137	0.137
Stathmin OS=Rattus norvegicus OX=10116 GN=Stmn1 PE=1 SV=2	STMN1_RAT	Stmn1	1.43	1.43	1.9	3.94	4.9	2.47	1.43	1.03
UDP-N-acetylglucosamine--peptide N-acetylglucosaminyltransferase 110 kDa subunit OS=Rattus norvegicus OX=10116 GN=Ogt PE=1 SV=1	OGT1_RAT	Ogt	0.118	0.149	0.0869	0.149	0.149	0.181	0.149	0.215
ATP synthase subunit f, mitochondrial OS=Rattus norvegicus OX=10116 GN=Atp5j2 PE=1 SV=1	ATPK_RAT	Atp5j2	1.35	3.16	1.35	1.35	1.35	1.35	1.35	2.13
Cathepsin B OS=Rattus norvegicus OX=10116 GN=Ctsb PE=1 SV=2	CATB_RAT	Ctsb	0.806	0.66	0.525	0.66	0.525	0.525	1.14	0.66
Cytoplasmic dynein 1 light intermediate chain 1 OS=Rattus norvegicus OX=10116 GN=Dync1li1 PE=1 SV=1	DC1L1_RAT	Dync1li1	0.119	0.401	0.324	0.183	0.401	0.324	0.324	0.324
40S ribosomal protein S23 OS=Rattus norvegicus OX=10116 GN=Rps23 PE=1 SV=3	RS23_RAT	Rps23	1.64	1.17	0.79	0	0	0.79	1.17	0.79
Nuclear pore complex protein Nup85 OS=Rattus norvegicus OX=10116 GN=Nup85 PE=2 SV=1	NUP85_RAT	Nup85	0.186	0.0892	0	0.186	0.186	0.292	0.137	0.0892
F-actin-capping protein subunit alpha-2 OS=Rattus norvegicus OX=10116 GN=Capza2 PE=1 SV=1	CAZA2_RAT	Capza2	0.774	0.774	0.612	0.951	0.612	0.774	0.612	0.774
Dihydropyrimidinase-related protein 5 OS=Rattus norvegicus OX=10116 GN=Dpysl5 PE=1 SV=1	DPYL5_RAT	Dpysl5	0.109	0.296	0.365	0.296	0.679	0.168	0.438	0.168
Serine/arginine-rich splicing factor 6 OS=Rattus norvegicus OX=10116 GN=Srsf6 PE=1 SV=1	SRSF6_RAT	Srsf6	0.276	0.627	0.176	0.5	0.176	0	0.276	0.176
6-phosphogluconate dehydrogenase, decarboxylating OS=Rattus norvegicus OX=10116 GN=Pgd PE=1 SV=1	6PGD_RAT	Pgd	0.349	0.432	0.52	0.614	0.432	0.614	0	0.27
Dual specificity mitogen-activated protein kinase kinase 1 OS=Rattus norvegicus OX=10116 GN=Map2k1 PE=1 SV=2	MP2K1_RAT	Map2k1	0.55	0.667	0.441	0.793	0.55	0.55	0.793	0.55
Protein SEC13 homolog OS=Rattus norvegicus OX=10116 GN=Sec13 PE=1 SV=1	SEC13_RAT	Sec13	0.704	0.704	0.427	0.559	0.427	0.862	0.559	0.862
KH domain-containing, RNA-binding, signal transduction-associated protein 1 OS=Rattus norvegicus OX=10116 GN=Khdrbs1 PE=1 SV=1	KHDR1_RAT	Khdrbs1	0.218	0.301	0.218	0.301	0.389	0.218	0.301	0.141
Glucocorticoid receptor OS=Rattus norvegicus OX=10116 GN=Nr3c1 PE=1 SV=2	GCR_RAT	Nr3c1	0.201	0.292	0.076	0.201	0.116	0.116	0.116	0.116
Synaptophysin OS=Rattus norvegicus OX=10116 GN=Syp PE=1 SV=1	SYPH_RAT	Syp	0.46	0.764	0.46	0.764	0.328	0.605	0.605	0.328
Delta(3,5)-Delta(2,4)-dienoyl-CoA isomerase, mitochondrial OS=Rattus norvegicus OX=10116 GN=Ech1 PE=1 SV=2	ECH1_RAT	Ech1	0.418	0.688	0.418	0.688	0	0.547	0.191	0.191
DNA-directed RNA polymerase I subunit RPA1 OS=Rattus norvegicus OX=10116 GN=Polr1a PE=1 SV=1	RPA1_RAT	Polr1a	0	0	0.0338	0.0338	0	0	0	0
E3 ubiquitin-protein ligase NEDD4 OS=Rattus norvegicus OX=10116 GN=Nedd4 PE=1 SV=1	NEDD4_RAT	Nedd4	0.134	0.245	0	0.285	0.245	0.207	0.245	0.245
Endoplasmic reticulum metallopeptidase 1 OS=Rattus norvegicus OX=10116 GN=Ermp1 PE=1 SV=1	ERMP1_RAT	Ermp1	0.137	0.213	0.174	0.137	0.379	0.213	0.101	0.174
ARF GTPase-activating protein GIT1 OS=Rattus norvegicus OX=10116 GN=Git1 PE=1 SV=1	GIT1_RAT	Git1	0.119	0.162	0.207	0.119	0.119	0.0781	0.119	0.0781
WD repeat-containing protein 81 OS=Rattus norvegicus OX=10116 GN=Wdr81 PE=3 SV=1	WDR81_RAT	Wdr81	0.0466	0.0466	0.0308	0.0308	0.0626	0.0308	0.0466	0.0626
Lysosome-associated membrane glycoprotein 1 OS=Rattus norvegicus OX=10116 GN=Lamp1 PE=1 SV=1	LAMP1_RAT	Lamp1	0.155	0.334	0.155	0.242	0.334	0.334	0.242	0.434
cAMP-dependent protein kinase type II-alpha regulatory subunit OS=Rattus norvegicus OX=10116 GN=Prkar2a PE=1 SV=4	KAP2_RAT	Prkar2a	0.418	0.418	0.875	0.418	0.418	0.749	0	0.15
Secretory carrier-associated membrane protein 1 OS=Rattus norvegicus OX=10116 GN=Scamp1 PE=1 SV=1	SCAM1_RAT	Scamp1	0.648	0.516	0.284	0.284	0	0	0.395	0.648
Cytoplasmic dynein 1 intermediate chain 2 OS=Rattus norvegicus OX=10116 GN=Dync1i2 PE=1 SV=1	DC1I2_RAT	Dync1i2	0.309	0.369	0.309	0.252	0.309	0.432	0.252	0.309
Very-long-chain 3-oxoacyl-CoA reductase OS=Rattus norvegicus OX=10116 GN=Hsd17b12 PE=2 SV=1	DHB12_RAT	Hsd17b12	0.312	0.312	0.436	0.312	0.721	0.312	0.312	0.572
Disks large homolog 1 OS=Rattus norvegicus OX=10116 GN=Dlg1 PE=1 SV=1	DLG1_RAT	Dlg1	0.1	0.1	0.1	0.211	0.0659	0.1	0.1	0.136
UDP-glucuronosyltransferase 1-6 OS=Rattus norvegicus OX=10116 GN=Ugt1a6 PE=1 SV=1	UD16_RAT	Ugt1a6	0.173	0.304	0.112	0.375	0.304	0.304	0.529	0.304
ADP-ribosylation factor 5 OS=Rattus norvegicus OX=10116 GN=Arf5 PE=1 SV=2	ARF5_RAT	Arf5	12	8.62	12	8.62	7.27	12	7.27	8.62
Complexin-2 OS=Rattus norvegicus OX=10116 GN=Cplx2 PE=1 SV=1	CPLX2_RAT	Cplx2	1.21	1.21	0.812	0.812	1.69	1.21	0.486	0.486
Neurabin-2 OS=Rattus norvegicus OX=10116 GN=Ppp1r9b PE=1 SV=1	NEB2_RAT	Ppp1r9b	0.113	0	0	0	0.196	0.0741	0	0
Tissue alpha-L-fucosidase OS=Rattus norvegicus OX=10116 GN=Fuca1 PE=1 SV=1	FUCO_RAT	Fuca1	0.269	0.346	0.269	0.429	0.429	0.429	0.429	0.346
Electron transfer flavoprotein-ubiquinone oxidoreductase, mitochondrial OS=Rattus norvegicus OX=10116 GN=Etfdh PE=1 SV=1	ETFD_RAT	Etfdh	0.151	0.325	0.206	0.206	0.388	0.151	0.325	0.151
Methionine aminopeptidase 2 OS=Rattus norvegicus OX=10116 GN=Metap2 PE=1 SV=2	MAP2_RAT	Metap2	0.271	0.35	0.521	0.197	0.35	0.35	0.197	0.35
Platelet-activating factor acetylhydrolase IB subunit beta OS=Rattus norvegicus OX=10116 GN=Pafah1b2 PE=1 SV=1	PA1B2_RAT	Pafah1b2	1.08	0.844	1.08	1.36	1.36	1.08	1.36	0.844
N(4)-(Beta-N-acetylglucosaminyl)-L-asparaginase OS=Rattus norvegicus OX=10116 GN=Aga PE=1 SV=2	ASPG_RAT	Aga	0.973	0.185	0.29	0.405	0.29	0.405	0.529	0.405
Short-chain specific acyl-CoA dehydrogenase, mitochondrial OS=Rattus norvegicus OX=10116 GN=Acads PE=1 SV=2	ACADS_RAT	Acads	0.237	0.425	0.328	0.425	0.152	0.425	0.328	0.328
Ras-related protein Rab-8A OS=Rattus norvegicus OX=10116 GN=Rab8a PE=1 SV=2	RAB8A_RAT	Rab8a	0.933	1.52	1.21	1.52	1.52	1.21	1.52	1.21
Heme oxygenase 2 OS=Rattus norvegicus OX=10116 GN=Hmox2 PE=1 SV=1	HMOX2_RAT	Hmox2	0.424	0.424	0.555	0.555	0	0.555	0.855	1.21
Procollagen-lysine,2-oxoglutarate 5-dioxygenase 3 OS=Rattus norvegicus OX=10116 GN=Plod3 PE=2 SV=1	PLOD3_RAT	Plod3	0.302	0.163	0.302	0.163	0.302	0.302	0.12	0
Rab GTPase-binding effector protein 1 OS=Rattus norvegicus OX=10116 GN=Rabep1 PE=1 SV=1	RABE1_RAT	Rabep1	0	0.102	0	0.138	0	0	0	0
Adenosine kinase OS=Rattus norvegicus OX=10116 GN=Adk PE=1 SV=3	ADK_RAT	Adk	0.484	0.738	0.484	1.58	0.484	0.267	0.484	0.267
Microtubule-associated protein RP/EB family member 3 OS=Rattus norvegicus OX=10116 GN=Mapre3 PE=1 SV=1	MARE3_RAT	Mapre3	0.805	0.992	0.343	0.343	0.343	0.343	0.218	0.636
Nuclear protein localization protein 4 homolog OS=Rattus norvegicus OX=10116 GN=Nploc4 PE=1 SV=3	NPL4_RAT	Nploc4	0.264	0.206	0.206	0.325	0.206	0.264	0.206	0.206
ProSAAS OS=Rattus norvegicus OX=10116 GN=Pcsk1n PE=1 SV=1	PCSK1_RAT	Pcsk1n	1.49	1.22	1.49	1.49	1.49	1.22	1.22	0.985
Flap endonuclease 1 OS=Rattus norvegicus OX=10116 GN=Fen1 PE=2 SV=1	FEN1_RAT	Fen1	0	0.682	0.346	0.562	0.25	0.45	0.346	0.562
1-phosphatidylinositol 4,5-bisphosphate phosphodiesterase beta-3 OS=Rattus norvegicus OX=10116 GN=Plcb3 PE=1 SV=2	PLCB3_RAT	Plcb3	0.0716	0.0716	0	0.0716	0	0.0472	0.0716	0
Sodium/potassium-transporting ATPase subunit alpha-2 OS=Rattus norvegicus OX=10116 GN=Atp1a2 PE=1 SV=1	AT1A2_RAT	Atp1a2	0	0	0	0	0.257	0	0	0
60S ribosomal protein L31 OS=Rattus norvegicus OX=10116 GN=Rpl31 PE=2 SV=1	RL31_RAT	Rpl31	2.55	1.33	0.883	2.55	1.87	1.33	1.87	1.33
COP9 signalosome complex subunit 2 OS=Rattus norvegicus OX=10116 GN=Cops2 PE=1 SV=1	CSN2_RAT	Cops2	0.203	0.361	0.203	0.203	0.279	0.203	0.131	0.279
CD2-associated protein OS=Rattus norvegicus OX=10116 GN=Cd2ap PE=1 SV=2	CD2AP_RAT	Cd2ap	0.0949	0.146	0.254	0.199	0.0949	0.146	0	0
Elongin-B OS=Rattus norvegicus OX=10116 GN=Elob PE=1 SV=1	ELOB_RAT	Elob	5.26	2.96	3.98	2.15	2.96	3.98	2.15	3.98
S-adenosylmethionine synthase isoform type-2 OS=Rattus norvegicus OX=10116 GN=Mat2a PE=1 SV=1	METK2_RAT	Mat2a	0.336	0.92	0.437	1.22	0.437	0.156	0.545	0.336
Acidic leucine-rich nuclear phosphoprotein 32 family member E OS=Rattus norvegicus OX=10116 GN=Anp32e PE=2 SV=1	AN32E_RAT	Anp32e	0.705	0.377	0.238	0.705	0.238	0.377	0.705	0.897
DnaJ homolog subfamily B member 11 OS=Rattus norvegicus OX=10116 GN=Dnajb11 PE=2 SV=1	DJB11_RAT	Dnajb11	0	0.169	0.169	0.367	0.169	0.478	0.264	0.264
eIF-2-alpha kinase GCN2 OS=Rattus norvegicus OX=10116 GN=Eif2ak4 PE=3 SV=2	E2AK4_RAT	Eif2ak4	0	0.0351	0	0.0351	0	0	0	0
Signal transducer and activator of transcription 5B OS=Rattus norvegicus OX=10116 GN=Stat5b PE=1 SV=1	STA5B_RAT	Stat5b	0.113	0	0	0.0737	0	0	0	0
Peripheral plasma membrane protein CASK OS=Rattus norvegicus OX=10116 GN=Cask PE=1 SV=1	CSKP_RAT	Cask	0.0641	0	0	0.0641	0.0641	0.0977	0	0
Calcyclin-binding protein OS=Rattus norvegicus OX=10116 GN=Cacybp PE=1 SV=1	CYBP_RAT	Cacybp	0.803	0.424	1.57	0.424	0.424	0.424	1.28	0.266
7-dehydrocholesterol reductase OS=Rattus norvegicus OX=10116 GN=Dhcr7 PE=2 SV=1	DHCR7_RAT	Dhcr7	0.193	0.265	0.193	0.341	0.193	0.265	0.265	0.265
Malignant T-cell-amplified sequence 1 OS=Rattus norvegicus OX=10116 GN=Mcts1 PE=2 SV=1	MCTS1_RAT	Mcts1	1.47	1.13	1.13	1.47	1.13	1.47	1.13	1.88
Transformer-2 protein homolog beta OS=Rattus norvegicus OX=10116 GN=Tra2b PE=1 SV=1	TRA2B_RAT	Tra2b	0.597	0.455	0.597	0.324	0.206	0.455	0.597	0.324
Prolactin regulatory element-binding protein OS=Rattus norvegicus OX=10116 GN=Preb PE=1 SV=2	PREB_RAT	Preb	0	0.15	0.15	0.234	0.15	0.15	0.15	0.234
Rho guanine nucleotide exchange factor 7 OS=Rattus norvegicus OX=10116 GN=Arhgef7 PE=1 SV=1	ARHG7_RAT	Arhgef7	0.0913	0.14	0	0.0913	0.14	0.0913	0	0
Deubiquitinating protein VCIP135 OS=Rattus norvegicus OX=10116 GN=Vcpip1 PE=1 SV=2	VCIP1_RAT	Vcpip1	0	0	0	0	0.0743	0	0	0
Mitogen-activated protein kinase 1 OS=Rattus norvegicus OX=10116 GN=Mapk1 PE=1 SV=3	MK01_RAT	Mapk1	1.51	1.51	0.584	1.51	0.71	0.994	1.51	1.32
Mitochondrial import receptor subunit TOM34 OS=Rattus norvegicus OX=10116 GN=Tomm34 PE=1 SV=1	TOM34_RAT	Tomm34	1.74	1.08	0.899	1.08	0.581	0.899	0.899	0.733
Transmembrane 9 superfamily member 2 OS=Rattus norvegicus OX=10116 GN=Tm9sf2 PE=2 SV=1	TM9S2_RAT	Tm9sf2	0.235	0.289	0.184	0.184	0.184	0.235	0.135	0.184
Enoyl-CoA hydratase, mitochondrial OS=Rattus norvegicus OX=10116 GN=Echs1 PE=1 SV=1	ECHM_RAT	Echs1	0.349	0.221	0.221	0	0.221	0.221	0.49	0.349
Protein LYRIC OS=Rattus norvegicus OX=10116 GN=Mtdh PE=1 SV=2	LYRIC_RAT	Mtdh	0.161	0.105	0.105	0.161	0.349	0.221	0.221	0
Exocyst complex component 5 OS=Rattus norvegicus OX=10116 GN=Exoc5 PE=1 SV=1	EXOC5_RAT	Exoc5	0	0	0	0.0815	0	0	0	0
ATP-dependent Clp protease ATP-binding subunit clpX-like, mitochondrial OS=Rattus norvegicus OX=10116 GN=Clpx PE=2 SV=1	CLPX_RAT	Clpx	0	0	0.149	0.0968	0.0968	0.0968	0	0
Shootin-1 OS=Rattus norvegicus OX=10116 GN=Shtn1 PE=1 SV=1	SHOT1_RAT	Shtn1	0.0937	0	0.0937	0.0937	0.0937	0	0	0
Dynactin subunit 4 OS=Rattus norvegicus OX=10116 GN=Dctn4 PE=1 SV=1	DCTN4_RAT	Dctn4	0.197	0.433	0.433	0.521	0.521	0.433	0.521	0.271
Enoyl-CoA delta isomerase 1, mitochondrial OS=Rattus norvegicus OX=10116 GN=Eci1 PE=1 SV=1	ECI1_RAT	Eci1	0.798	0.798	0.982	0.63	0.63	0.982	0.982	0.982
Protein-L-isoaspartate(D-aspartate) O-methyltransferase OS=Rattus norvegicus OX=10116 GN=Pcmt1 PE=1 SV=2	PIMT_RAT	Pcmt1	1.43	1.43	0.884	0.884	1.14	1.43	1.43	2.55
Lysine--tRNA ligase OS=Rattus norvegicus OX=10116 GN=Kars PE=1 SV=1	SYK_RAT	Kars	0.0934	0.195	0.143	0.0934	0.25	0.195	0	0.0934
Exocyst complex component 2 OS=Rattus norvegicus OX=10116 GN=Exoc2 PE=1 SV=1	EXOC2_RAT	Exoc2	0.131	0.0969	0	0.0969	0.0636	0.0969	0.0969	0.0969
m7GpppX diphosphatase OS=Rattus norvegicus OX=10116 GN=Dcps PE=2 SV=1	DCPS_RAT	Dcps	0.504	0.77	0.504	0.77	0.504	0.632	0.632	0.77
Protein DEK OS=Rattus norvegicus OX=10116 GN=Dek PE=1 SV=1	DEK_RAT	Dek	0.344	0.344	0.447	0.447	0.248	0.447	0.344	0.344
Myristoylated alanine-rich C-kinase substrate OS=Rattus norvegicus OX=10116 GN=Marcks PE=1 SV=2	MARCS_RAT	Marcks	0.695	0.884	1.59	0.695	0.884	1.33	0.884	0.884
Dihydrolipoyllysine-residue acetyltransferase component of pyruvate dehydrogenase complex, mitochondrial OS=Rattus norvegicus OX=10116 GN=Dlat PE=1 SV=3	ODP2_RAT	Dlat	0.268	0.33	0.268	0.268	0.33	0.33	0.268	0.153
60S ribosomal protein L38 OS=Rattus norvegicus OX=10116 GN=Rpl38 PE=1 SV=2	RL38_RAT	Rpl38	7.4	11	7.4	16.1	11	11	11	11
Histone H1.0 OS=Rattus norvegicus OX=10116 GN=H1f0 PE=2 SV=2	H10_RAT	H1f0	0.812	0.812	0.812	0.562	0.812	1.1	0.812	0.562
Eukaryotic translation initiation factor 5 OS=Rattus norvegicus OX=10116 GN=Eif5 PE=1 SV=1	IF5_RAT	Eif5	0.139	0.296	0.383	0.296	0.215	0.383	0.215	0.296
Zinc phosphodiesterase ELAC protein 2 OS=Rattus norvegicus OX=10116 GN=Elac2 PE=1 SV=1	RNZ2_RAT	Elac2	0	0.0719	0.0719	0	0	0	0	0
Protein RUFY3 OS=Rattus norvegicus OX=10116 GN=Rufy3 PE=1 SV=1	RUFY3_RAT	Rufy3	0	0.128	0	0.272	0.128	0	0	0
Moesin OS=Rattus norvegicus OX=10116 GN=Msn PE=1 SV=3	MOES_RAT	Msn	0	0	0.327	0	0	0	0	0
Slit homolog 1 protein OS=Rattus norvegicus OX=10116 GN=Slit1 PE=1 SV=1	SLIT1_RAT	Slit1	0	0	0	0	0	0	0.0392	0
Spermatid perinuclear RNA-binding protein OS=Rattus norvegicus OX=10116 GN=Strbp PE=1 SV=1	STRBP_RAT	Strbp	0.241	0	0	0	0	0	0	0
AP-1 complex subunit mu-1 OS=Rattus norvegicus OX=10116 GN=Ap1m1 PE=1 SV=3	AP1M1_RAT	Ap1m1	0.217	0.581	0.299	0.481	0.14	0.217	0.481	0.299
Syntaxin-binding protein 2 OS=Rattus norvegicus OX=10116 GN=Stxbp2 PE=2 SV=1	STXB2_RAT	Stxbp2	0.155	0.271	0.333	0.271	0.211	0.211	0.155	0.155
Thioredoxin-related transmembrane protein 2 OS=Rattus norvegicus OX=10116 GN=Tmx2 PE=2 SV=1	TMX2_RAT	Tmx2	0.451	0.748	0.451	0.748	0.451	0.748	0.451	0.451
Histone H2A.Z OS=Rattus norvegicus OX=10116 GN=H2afz PE=1 SV=2	H2AZ_RAT	H2afz	2.83	3.79	5	2.83	6.5	3.79	2.83	2.83
Secretogranin-2 OS=Rattus norvegicus OX=10116 GN=Scg2 PE=1 SV=1	SCG2_RAT	Scg2	0.0941	0	0	0	0.144	0.0941	0.0941	0
Ubiquitin carboxyl-terminal hydrolase 19 OS=Rattus norvegicus OX=10116 GN=Usp19 PE=1 SV=1	UBP19_RAT	Usp19	0.0894	0.0438	0.0663	0.0438	0.0663	0	0	0
ATP-dependent zinc metalloprotease YME1L1 OS=Rattus norvegicus OX=10116 GN=Yme1l1 PE=2 SV=1	YMEL1_RAT	Yme1l1	0	0.174	0.128	0.128	0.128	0.128	0	0.0835
AH receptor-interacting protein OS=Rattus norvegicus OX=10116 GN=Aip PE=1 SV=1	AIP_RAT	Aip	0.957	0.957	0.655	1.13	0.522	0.8	0.655	0.957
Proteasome subunit beta type-4 OS=Rattus norvegicus OX=10116 GN=Psmb4 PE=1 SV=2	PSB4_RAT	Psmb4	1.36	0.712	0.906	0.906	0.906	1.12	1.12	0.712
ATP synthase subunit g, mitochondrial OS=Rattus norvegicus OX=10116 GN=Atp5l PE=1 SV=2	ATP5L_RAT	Atp5l	2.71	0.689	1.2	2.71	1.85	2.71	2.71	2.71
60S ribosomal protein L35a OS=Rattus norvegicus OX=10116 GN=Rpl35a PE=3 SV=1	RL35A_RAT	Rpl35a	0.618	0	0	0	0	0	0.618	0.618
S-phase kinase-associated protein 1 OS=Rattus norvegicus OX=10116 GN=Skp1 PE=1 SV=3	SKP1_RAT	Skp1	0.643	1.29	1.29	0	1.29	1.7	0.643	2.18
Ubiquitin recognition factor in ER-associated degradation protein 1 OS=Rattus norvegicus OX=10116 GN=Ufd1 PE=1 SV=1	UFD1_RAT	Ufd1	0.733	0.581	0	0.443	0.443	0.316	0.733	0.581
Cysteine and histidine-rich domain-containing protein 1 OS=Rattus norvegicus OX=10116 GN=Chordc1 PE=3 SV=1	CHRD1_RAT	Chordc1	0.289	0.185	0.185	0.289	0.809	0.289	0	0
Double-stranded RNA-specific adenosine deaminase OS=Rattus norvegicus OX=10116 GN=Adar PE=1 SV=1	DSRAD_RAT	Adar	0.0507	0.0507	0	0	0.104	0	0.077	0
High mobility group protein B2 OS=Rattus norvegicus OX=10116 GN=Hmgb2 PE=2 SV=2	HMGB2_RAT	Hmgb2	1.17	1.8	0.905	1.17	0.905	1.17	1.46	1.46
Lysophospholipid acyltransferase 5 OS=Rattus norvegicus OX=10116 GN=Lpcat3 PE=2 SV=1	MBOA5_RAT	Lpcat3	0.407	0.329	0.256	0.407	0.329	0.407	0.489	0.329
Armadillo repeat-containing X-linked protein 3 OS=Rattus norvegicus OX=10116 GN=Armcx3 PE=1 SV=1	ARMX3_RAT	Armcx3	0.564	0.451	0.161	0.564	0.564	0.347	0.685	0.815
G kinase-anchoring protein 1 OS=Rattus norvegicus OX=10116 GN=Gkap1 PE=1 SV=1	GKAP1_RAT	Gkap1	0	0	0	0.254	0	0.163	0.163	0
Synaptic functional regulator FMR1 OS=Rattus norvegicus OX=10116 GN=Fmr1 PE=1 SV=2	FMR1_RAT	Fmr1	0.211	0.211	0.27	0.211	0.211	0.333	0	0.211
Golgin subfamily A member 5 OS=Rattus norvegicus OX=10116 GN=Golga5 PE=1 SV=1	GOGA5_RAT	Golga5	0	0	0.263	0.0809	0	0	0	0
Tuberin OS=Rattus norvegicus OX=10116 GN=Tsc2 PE=1 SV=1	TSC2_RAT	Tsc2	0.0325	0	0	0	0.0492	0	0	0.0492
Cytochrome b-c1 complex subunit Rieske, mitochondrial OS=Rattus norvegicus OX=10116 GN=Uqcrfs1 PE=1 SV=2	UCRI_RAT	Uqcrfs1	1.61	0.377	0.897	0.897	0.705	0.897	0.897	0.897
40S ribosomal protein S5 OS=Rattus norvegicus OX=10116 GN=Rps5 PE=1 SV=3	RS5_RAT	Rps5	0.724	0.724	0.724	0.975	1.26	0.313	0.504	0.724
Alpha-2-macroglobulin receptor-associated protein OS=Rattus norvegicus OX=10116 GN=Lrpap1 PE=1 SV=2	AMRP_RAT	Lrpap1	0	0.458	0.352	0.254	0.352	0.352	0.573	0.573
Splicing factor 3B subunit 4 OS=Rattus norvegicus OX=10116 GN=Sf3b4 PE=2 SV=1	SF3B4_RAT	Sf3b4	0.332	0.24	0.332	0.332	0.332	0.332	0.24	0.154
3-ketoacyl-CoA thiolase B, peroxisomal OS=Rattus norvegicus OX=10116 GN=Acaa1b PE=1 SV=2	THIKB_RAT	Acaa1b	0.335	0.659	0.335	0.543	0.543	0.156	0.335	0.156
Proteasomal ubiquitin receptor ADRM1 OS=Rattus norvegicus OX=10116 GN=Adrm1 PE=1 SV=2	ADRM1_RAT	Adrm1	0.162	0.457	0.253	0.253	0.162	0.351	0.351	0.457
Annexin A6 OS=Rattus norvegicus OX=10116 GN=Anxa6 PE=1 SV=2	ANXA6_RAT	Anxa6	0	0	0	0	0.135	0.288	0.0881	0
Golgi integral membrane protein 4 OS=Rattus norvegicus OX=10116 GN=Golim4 PE=1 SV=2	GOLI4_RAT	Golim4	0	0.0871	0	0	0	0	0	0
Kinesin-like protein KIF2C OS=Rattus norvegicus OX=10116 GN=Kif2c PE=2 SV=3	KIF2C_RAT	Kif2c	0	0	0	0.0884	0	0	0	0
Redox-regulatory protein FAM213A OS=Rattus norvegicus OX=10116 GN=Fam213a PE=1 SV=1	F213A_RAT	Fam213a	1.34	0.835	1.07	1.34	1.07	1.34	0.835	1.07
L-lactate dehydrogenase B chain OS=Rattus norvegicus OX=10116 GN=Ldhb PE=1 SV=2	LDHB_RAT	Ldhb	0.412	0.412	0.188	0.828	0.412	0.412	0.993	0.677
RNA-binding protein 3 OS=Rattus norvegicus OX=10116 GN=Rbm3 PE=1 SV=2	RBM3_RAT	Rbm3	2.57	2.57	3.29	1.98	2.57	1.98	3.29	1.07
NADH-ubiquinone oxidoreductase chain 5 OS=Rattus norvegicus OX=10116 GN=Mtnd5 PE=3 SV=3	NU5M_RAT	Mtnd5	0.15	0.15	0.15	0.15	0.262	0.0976	0.15	0.0976
Parathymosin OS=Rattus norvegicus OX=10116 GN=Ptms PE=1 SV=2	PTMS_RAT	Ptms	1.83	3.76	2.67	2.67	3.76	3.76	2.67	0.682
Septin-5 OS=Rattus norvegicus OX=10116 GN=Sept5 PE=1 SV=2	SEPT5_RAT	2005-09-01	0.248	0.344	0.159	0.344	0.344	0.248	0.447	0.248
Ras-related protein Rab-35 OS=Rattus norvegicus OX=10116 GN=Rab35 PE=1 SV=1	RAB35_RAT	Rab35	1.25	0	1.58	0	1.25	1.96	1.58	1.58
Calbindin OS=Rattus norvegicus OX=10116 GN=Calb1 PE=1 SV=2	CALB1_RAT	Calb1	0	0.369	0.233	0.369	0.521	0.369	0	0.521
60S ribosomal protein L30 OS=Rattus norvegicus OX=10116 GN=Rpl30 PE=3 SV=2	RL30_RAT	Rpl30	1.03	0	0	1.03	1.03	2.27	0	1.03
RNA-binding protein 8A OS=Rattus norvegicus OX=10116 GN=Rbm8a PE=1 SV=1	RBM8A_RAT	Rbm8a	2.48	1.97	1.97	1.55	1.55	2.48	1.97	1.97
Mitochondrial import receptor subunit TOM22 homolog OS=Rattus norvegicus OX=10116 GN=Tomm22 PE=1 SV=1	TOM22_RAT	Tomm22	3.88	3	3	1.21	2.28	1.69	2.28	1.69
Adaptin ear-binding coat-associated protein 1 OS=Rattus norvegicus OX=10116 GN=Necap1 PE=1 SV=1	NECP1_RAT	Necap1	0.695	0.372	0.525	0.884	0.372	0.235	0.372	0.372
60S ribosomal protein L36 OS=Rattus norvegicus OX=10116 GN=Rpl36 PE=1 SV=2	RL36_RAT	Rpl36	2.43	1.68	1.68	1.68	1.1	1.68	3.39	1.1
Translin-associated protein X OS=Rattus norvegicus OX=10116 GN=Tsnax PE=1 SV=1	TSNAX_RAT	Tsnax	0.951	0.612	0	0.612	0	0.612	0.774	0.332
Polypyrimidine tract-binding protein 2 OS=Rattus norvegicus OX=10116 GN=Ptbp2 PE=1 SV=1	PTBP2_RAT	Ptbp2	0	0	0.319	0.248	0	0.248	0	0
Arf-GAP with SH3 domain, ANK repeat and PH domain-containing protein 1 OS=Rattus norvegicus OX=10116 GN=Asap1 PE=1 SV=2	ASAP1_RAT	Asap1	0.0519	0	0	0	0.0519	0.0519	0.106	0
Guanine nucleotide-binding protein G(I)/G(S)/G(T) subunit beta-1 OS=Rattus norvegicus OX=10116 GN=Gnb1 PE=1 SV=4	GBB1_RAT	Gnb1	0.288	0.525	0.288	0.402	0.525	0.288	0.288	0.184
Septin-2 OS=Rattus norvegicus OX=10116 GN=Sept2 PE=1 SV=1	SEPT2_RAT	2002-09-01	0.58	0.357	0.464	0.58	0.257	0.257	0.357	0.464
Beta-glucuronidase OS=Rattus norvegicus OX=10116 GN=Gusb PE=2 SV=1	BGLR_RAT	Gusb	0.0893	0.0893	0.137	0.137	0.137	0.137	0.137	0.137
Phosphatidylinositol 5-phosphate 4-kinase type-2 gamma OS=Rattus norvegicus OX=10116 GN=Pip4k2c PE=1 SV=1	PI42C_RAT	Pip4k2c	0.224	0.31	0.224	0.224	0.31	0.144	0.224	0.144
Epithelial splicing regulatory protein 1 OS=Rattus norvegicus OX=10116 GN=Esrp1 PE=2 SV=2	ESRP1_RAT	Esrp1	0.0891	0.186	0.348	0.292	0.238	0.238	0.137	0.137
Centromere/kinetochore protein zw10 homolog OS=Rattus norvegicus OX=10116 GN=Zw10 PE=2 SV=3	ZW10_RAT	Zw10	0.0756	0.115	0.115	0	0.0756	0	0.0756	0
Glutathione hydrolase 7 OS=Rattus norvegicus OX=10116 GN=Ggt7 PE=1 SV=2	GGT7_RAT	Ggt7	0.313	0.199	0.255	0.313	0.438	0.648	0.313	0.374
Ras-related protein Rab-21 OS=Rattus norvegicus OX=10116 GN=Rab21 PE=2 SV=1	RAB21_RAT	Rab21	0.905	1.17	0.674	1.17	0.472	1.17	1.17	0.905
cAMP-dependent protein kinase type II-beta regulatory subunit OS=Rattus norvegicus OX=10116 GN=Prkar2b PE=1 SV=3	KAP3_RAT	Prkar2b	0.23	0.411	0.512	0.62	0.62	0.23	0.23	0.317
Acidic leucine-rich nuclear phosphoprotein 32 family member B OS=Rattus norvegicus OX=10116 GN=Anp32b PE=1 SV=1	AN32B_RAT	Anp32b	1.25	1.03	0.499	1.25	0.499	0.499	1.03	1.03
Ras-related protein Rab-3A OS=Rattus norvegicus OX=10116 GN=Rab3a PE=1 SV=1	RAB3A_RAT	Rab3a	2.08	1.72	1.72	2.08	2.08	1.72	2.08	2.08
FAS-associated factor 2 OS=Rattus norvegicus OX=10116 GN=Faf2 PE=2 SV=1	FAF2_RAT	Faf2	0.361	0.26	0.47	0.167	0.588	0.588	0.588	0
Proteasome subunit alpha type-4 OS=Rattus norvegicus OX=10116 GN=Psma4 PE=1 SV=1	PSA4_RAT	Psma4	0.892	0.702	0.702	0.53	0.892	0.376	1.1	0.892
60S ribosomal protein L32 OS=Rattus norvegicus OX=10116 GN=Rpl32 PE=1 SV=2	RL32_RAT	Rpl32	0	0	0	0.471	0	0.471	0	0.783
CDKN2A-interacting protein OS=Rattus norvegicus OX=10116 GN=Cdkn2aip PE=1 SV=1	CARF_RAT	Cdkn2aip	0	0.171	0.111	0.111	0	0.111	0.111	0.111
3-hydroxyisobutyrate dehydrogenase, mitochondrial OS=Rattus norvegicus OX=10116 GN=Hibadh PE=1 SV=3	3HIDH_RAT	Hibadh	1.04	0.709	0.709	0.709	0	0.563	0.869	0.869
Protein kinase C beta type OS=Rattus norvegicus OX=10116 GN=Prkcb PE=1 SV=3	KPCB_RAT	Prkcb	0.087	0	0	0.087	0.087	0	0	0
DnaJ homolog subfamily A member 2 OS=Rattus norvegicus OX=10116 GN=Dnaja2 PE=1 SV=1	DNJA2_RAT	Dnaja2	0	0.149	0.415	0.415	0	0.32	0.231	0.516
Myosin-3 OS=Rattus norvegicus OX=10116 GN=Myh3 PE=3 SV=1	MYH3_RAT	Myh3	0	0	0	0	0	0.0292	0	0
Testin OS=Rattus norvegicus OX=10116 GN=Tes PE=1 SV=1	TES_RAT	Tes	0	0.143	0.143	0.143	0.221	0.143	0	0
Syndetin OS=Rattus norvegicus OX=10116 GN=Vps50 PE=1 SV=1	VPS50_RAT	Vps50	0	0.0905	0	0.0595	0.0595	0	0	0.122
Myosin regulatory light chain 12B OS=Rattus norvegicus OX=10116 GN=Myl12b PE=1 SV=3	ML12B_RAT	Myl12b	2.48	1.97	1.55	1.18	1.97	1.18	2.48	1.97
Activated RNA polymerase II transcriptional coactivator p15 OS=Rattus norvegicus OX=10116 GN=Sub1 PE=1 SV=3	TCP4_RAT	Sub1	1.87	0.525	1.87	0.883	1.87	1.33	2.55	1.87
Cleavage and polyadenylation specificity factor subunit 7 OS=Rattus norvegicus OX=10116 GN=Cpsf7 PE=1 SV=1	CPSF7_RAT	Cpsf7	0.283	0.546	0.453	0.365	0.283	0.453	0.205	0.205
Mediator of RNA polymerase II transcription subunit 23 OS=Rattus norvegicus OX=10116 GN=Med23 PE=2 SV=2	MED23_RAT	Med23	0.132	0	0	0.0421	0.0859	0.0421	0	0.0421
Fatty acid-binding protein 5 OS=Rattus norvegicus OX=10116 GN=Fabp5 PE=1 SV=3	FABP5_RAT	Fabp5	2.36	1.75	1.75	1.75	1.25	1.75	1.75	1.75
Beta-hexosaminidase subunit alpha OS=Rattus norvegicus OX=10116 GN=Hexa PE=2 SV=1	HEXA_RAT	Hexa	0.301	0.171	0.171	0.235	0.171	0.372	0.301	0.301
NADH-ubiquinone oxidoreductase chain 1 OS=Rattus norvegicus OX=10116 GN=Mtnd1 PE=1 SV=3	NU1M_RAT	Mtnd1	0.3	0.191	0.549	0.419	0.549	0.419	0.419	0.3
Syntaxin-1A OS=Rattus norvegicus OX=10116 GN=Stx1a PE=1 SV=1	STX1A_RAT	Stx1a	0.21	0.463	0.21	0.331	0.21	0.331	0.331	0.331
Keratin, type II cytoskeletal 2 epidermal OS=Rattus norvegicus OX=10116 GN=Krt2 PE=3 SV=1	K22E_RAT	Krt2	0.26	0.0969	0.203	0.0969	0.32	0.203	0.203	0.26
FAST kinase domain-containing protein 4 OS=Rattus norvegicus OX=10116 GN=Tbrg4 PE=2 SV=1	FAKD4_RAT	Tbrg4	0	0.197	0.144	0.144	0.197	0.197	0.094	0.094
mRNA cap guanine-N7 methyltransferase OS=Rattus norvegicus OX=10116 GN=Rnmt PE=1 SV=1	MCES_RAT	Rnmt	0	0.198	0.198	0	0.198	0.198	0.272	0.198
Glutathione reductase (Fragment) OS=Rattus norvegicus OX=10116 GN=Gsr PE=2 SV=2	GSHR_RAT	Gsr	0.228	0.228	0	0.228	0.228	0.147	0.228	0.147
Tubulin-specific chaperone E OS=Rattus norvegicus OX=10116 GN=Tbce PE=2 SV=1	TBCE_RAT	Tbce	0	0.176	0.114	0.176	0.241	0.176	0.114	0.114
Hepatocyte growth factor-regulated tyrosine kinase substrate OS=Rattus norvegicus OX=10116 GN=Hgs PE=1 SV=1	HGS_RAT	Hgs	0.0771	0	0.0771	0.0771	0.0771	0.0771	0.118	0
Galectin-3-binding protein OS=Rattus norvegicus OX=10116 GN=Lgals3bp PE=1 SV=2	LG3BP_RAT	Lgals3bp	0.284	0.284	0.222	0.222	0.222	0.162	0.284	0.222
Transcriptional activator protein Pur-alpha (Fragments) OS=Rattus norvegicus OX=10116 GN=Pura PE=1 SV=1	PURA_RAT	Pura	1.71	2.31	1.22	1.22	2.31	1.71	3.04	2.31
Drebrin-like protein OS=Rattus norvegicus OX=10116 GN=Dbnl PE=1 SV=1	DBNL_RAT	Dbnl	0.299	0.386	0.299	0.58	0.48	0.58	0.299	0.217
Nicotinamide phosphoribosyltransferase OS=Rattus norvegicus OX=10116 GN=Nampt PE=1 SV=1	NAMPT_RAT	Nampt	0.122	0.333	0	0.188	0.258	0.122	0.122	0.333
Protein phosphatase 1A OS=Rattus norvegicus OX=10116 GN=Ppm1a PE=1 SV=1	PPM1A_RAT	Ppm1a	0	0.161	0	0.161	0	0.161	0.251	0
Sphingosine-1-phosphate lyase 1 OS=Rattus norvegicus OX=10116 GN=Sgpl1 PE=2 SV=1	SGPL1_RAT	Sgpl1	0.105	0.162	0.105	0.105	0.105	0.162	0.105	0
YLP motif-containing protein 1 OS=Rattus norvegicus OX=10116 GN=Ylpm1 PE=1 SV=1	YLPM1_RAT	Ylpm1	0.0426	0.0646	0.0426	0.0426	0	0.0426	0.0426	0.0426
F-actin-capping protein subunit alpha-1 OS=Rattus norvegicus OX=10116 GN=Capza1 PE=1 SV=1	CAZA1_RAT	Capza1	0.956	1.15	0.956	1.37	0.956	1.15	0.956	0.777
Putative phospholipase B-like 2 OS=Rattus norvegicus OX=10116 GN=Plbd2 PE=1 SV=2	PLBL2_RAT	Plbd2	0.276	0.34	0.34	0.34	0.276	0.276	0.276	0.34
Hepatoma-derived growth factor OS=Rattus norvegicus OX=10116 GN=Hdgf PE=1 SV=2	HDGF_RAT	Hdgf	0.808	0.426	0.606	0.808	0.426	0.606	0.808	0.808
Nicalin OS=Rattus norvegicus OX=10116 GN=Ncln PE=2 SV=1	NCLN_RAT	Ncln	0.164	0.288	0.288	0.164	0.288	0.5	0	0.164
Syntaxin-5 OS=Rattus norvegicus OX=10116 GN=Stx5 PE=1 SV=2	STX5_RAT	Stx5	0.375	0.746	0.375	0.173	0.173	0.27	0.375	0.27
NADH dehydrogenase [ubiquinone] iron-sulfur protein 4, mitochondrial OS=Rattus norvegicus OX=10116 GN=Ndufs4 PE=1 SV=1	NDUS4_RAT	Ndufs4	0.6	0	0.368	0	0.871	0.368	0.368	0.368
Hepatoma-derived growth factor-related protein 2 OS=Rattus norvegicus OX=10116 GN=Hdgfl2 PE=1 SV=2	HDGR2_RAT	Hdgfl2	0.0903	0.0903	0	0.138	0.138	0.241	0	0.0903
ATPase family AAA domain-containing protein 3 OS=Rattus norvegicus OX=10116 GN=Atad3 PE=1 SV=1	ATAD3_RAT	Atad3	0	0	0.1	0	0	0.154	0	0
CDP-diacylglycerol--inositol 3-phosphatidyltransferase OS=Rattus norvegicus OX=10116 GN=Cdipt PE=1 SV=1	CDIPT_RAT	Cdipt	0.694	0.933	1.21	1.87	0.694	1.21	1.21	0.933
Arfaptin-2 OS=Rattus norvegicus OX=10116 GN=Arfip2 PE=2 SV=1	ARFP2_RAT	Arfip2	0.653	0.653	0.398	0.954	0.398	0.286	0.797	0.182
Mitogen-activated protein kinase 14 OS=Rattus norvegicus OX=10116 GN=Mapk14 PE=1 SV=3	MK14_RAT	Mapk14	0.359	0.259	0.259	0.584	0.467	0.259	0.847	0.259
60S ribosomal protein L24 OS=Rattus norvegicus OX=10116 GN=Rpl24 PE=2 SV=1	RL24_RAT	Rpl24	0.682	1	0.682	1.83	0.682	0.682	0.682	0
Hsp70-binding protein 1 OS=Rattus norvegicus OX=10116 GN=Hspbp1 PE=1 SV=1	HPBP1_RAT	Hspbp1	0.175	0.381	0.274	0.274	0.175	0.274	0.274	0.175
Transmembrane 9 superfamily member 4 OS=Rattus norvegicus OX=10116 GN=Tm9sf4 PE=2 SV=1	TM9S4_RAT	Tm9sf4	0.137	0.137	0	0.187	0.137	0.293	0.187	0.239
Heat shock 70 kDa protein 13 OS=Rattus norvegicus OX=10116 GN=Hspa13 PE=1 SV=2	HSP13_RAT	Hspa13	0	0.131	0.203	0.203	0.279	0.36	0.131	0.131
Protein PRRC1 OS=Rattus norvegicus OX=10116 GN=Prrc1 PE=2 SV=1	PRRC1_RAT	Prrc1	0	0.316	0.147	0.316	0.228	0.509	0.228	0.228
3-mercaptopyruvate sulfurtransferase OS=Rattus norvegicus OX=10116 GN=Mpst PE=1 SV=3	THTM_RAT	Mpst	0.332	0.332	0	0.465	0	0.465	0.465	0.465
Vesicle-associated membrane protein 7 OS=Rattus norvegicus OX=10116 GN=Vamp7 PE=1 SV=1	VAMP7_RAT	Vamp7	0.656	0.878	0.46	0.656	0.46	0.46	1.42	0.878
Actin-related protein 2/3 complex subunit 1B OS=Rattus norvegicus OX=10116 GN=Arpc1b PE=1 SV=3	ARC1B_RAT	Arpc1b	0.361	0.167	0.26	0.26	0.26	0.26	0.167	0.26
Golgi SNAP receptor complex member 1 OS=Rattus norvegicus OX=10116 GN=Gosr1 PE=1 SV=1	GOSR1_RAT	Gosr1	0.552	0.552	0.246	0.391	0.552	0.246	0.391	0.391
40S ribosomal protein S27 OS=Rattus norvegicus OX=10116 GN=Rps27 PE=1 SV=3	RS27_RAT	Rps27	2.5	2.5	1.56	1.56	1.56	1.56	0.87	1.56
Isochorismatase domain-containing protein 1 OS=Rattus norvegicus OX=10116 GN=Isoc1 PE=1 SV=1	ISOC1_RAT	Isoc1	0.805	0.636	0.636	0.636	0	0.482	0.636	0.482
Enoyl-[acyl-carrier-protein] reductase, mitochondrial OS=Rattus norvegicus OX=10116 GN=Mecr PE=1 SV=1	MECR_RAT	Mecr	0.17	0.17	0	0	0	0	0	0
Ras-related protein Rab-3C OS=Rattus norvegicus OX=10116 GN=Rab3c PE=1 SV=1	RAB3C_RAT	Rab3c	1.33	1.33	1.33	1.97	1.07	2.78	1.33	1.97
4-trimethylaminobutyraldehyde dehydrogenase OS=Rattus norvegicus OX=10116 GN=Aldh9a1 PE=1 SV=1	AL9A1_RAT	Aldh9a1	0.126	0.126	0	0.195	0.268	0.126	0.195	0.126
DnaJ homolog subfamily C member 10 OS=Rattus norvegicus OX=10116 GN=Dnajc10 PE=2 SV=2	DJC10_RAT	Dnajc10	0.0732	0	0.0732	0	0.0732	0	0	0
Protein FAM98A OS=Rattus norvegicus OX=10116 GN=Fam98a PE=2 SV=1	FA98A_RAT	Fam98a	0.189	0.123	0	0.123	0	0.189	0	0.123
Methyl-CpG-binding protein 2 OS=Rattus norvegicus OX=10116 GN=Mecp2 PE=1 SV=1	MECP2_RAT	Mecp2	0	0	0.127	0	0	0.127	0	0
Aminoacyl tRNA synthase complex-interacting multifunctional protein 2 OS=Rattus norvegicus OX=10116 GN=Aimp2 PE=2 SV=1	AIMP2_RAT	Aimp2	0.306	0.707	0.306	0.866	0.866	0.428	0.707	0.561
Vacuolar protein sorting-associated protein 29 OS=Rattus norvegicus OX=10116 GN=Vps29 PE=1 SV=2	VPS29_RAT	Vps29	1.48	0.834	1.13	0.576	1.13	0.834	0.576	1.13
C-terminal-binding protein 1 OS=Rattus norvegicus OX=10116 GN=Ctbp1 PE=1 SV=3	CTBP1_RAT	Ctbp1	0.313	0.313	0.405	0.61	0.405	0.146	0.405	0.61
Protein phosphatase 1E OS=Rattus norvegicus OX=10116 GN=Ppm1e PE=1 SV=1	PPM1E_RAT	Ppm1e	0.166	0.122	0.166	0.122	0.122	0.0798	0.122	0.122
40S ribosomal protein S26 OS=Rattus norvegicus OX=10116 GN=Rps26 PE=3 SV=3	RS26_RAT	Rps26	1.54	1.01	1.01	1.01	1.01	1.54	1.54	1.54
Synaptotagmin-7 OS=Rattus norvegicus OX=10116 GN=Syt7 PE=1 SV=1	SYT7_RAT	Syt7	0.15	0.521	0.15	0.233	0.322	0.418	0.521	0.322
Protein SGT1 homolog OS=Rattus norvegicus OX=10116 GN=Sugt1 PE=2 SV=1	SGT1_RAT	Sugt1	0.394	0.394	0.394	0.394	0.283	0.394	0.514	0.394
Golgi phosphoprotein 3 OS=Rattus norvegicus OX=10116 GN=Golph3 PE=1 SV=1	GOLP3_RAT	Golph3	0.751	0.323	0.453	0.323	0.205	0.323	0.453	0.453
Cyclin-dependent-like kinase 5 OS=Rattus norvegicus OX=10116 GN=Cdk5 PE=1 SV=1	CDK5_RAT	Cdk5	0.607	0.462	0.607	0.462	0.329	0	0.462	0.607
60S ribosomal protein L29 OS=Rattus norvegicus OX=10116 GN=Rpl29 PE=1 SV=3	RL29_RAT	Rpl29	0.426	0	0	0	0.426	0.426	0.426	0
Basic leucine zipper and W2 domain-containing protein 2 OS=Rattus norvegicus OX=10116 GN=Bzw2 PE=1 SV=1	BZW2_RAT	Bzw2	0	0.302	0	0.219	0	0.141	0.219	0
Electron transfer flavoprotein subunit beta OS=Rattus norvegicus OX=10116 GN=Etfb PE=1 SV=3	ETFB_RAT	Etfb	0.762	0.762	0.405	0.405	0.762	0.574	0.974	0.574
Synaptotagmin-5 OS=Rattus norvegicus OX=10116 GN=Syt5 PE=1 SV=1	SYT5_RAT	Syt5	0.247	0.445	0.247	0.342	0.555	0.247	0.247	0.247
Endophilin-B1 OS=Rattus norvegicus OX=10116 GN=Sh3glb1 PE=2 SV=1	SHLB1_RAT	Sh3glb1	0.168	0.594	0.262	0.723	0.168	0.262	0.364	0.262
Triokinase/FMN cyclase OS=Rattus norvegicus OX=10116 GN=Tkfc PE=1 SV=1	TKFC_RAT	Tkfc	0	0.113	0.113	0.113	0.308	0.175	0.175	0.113
3-hydroxyisobutyryl-CoA hydrolase, mitochondrial OS=Rattus norvegicus OX=10116 GN=Hibch PE=1 SV=2	HIBCH_RAT	Hibch	0.159	0.446	0.343	0.557	0	0.248	0.248	0.248
Putative 60S ribosomal protein L37a OS=Rattus norvegicus OX=10116 GN=Rpl37a-ps1 PE=5 SV=2	RL37P_RAT	Rpl37a-ps1	1.37	1.37	1.37	0	1.37	0	1.37	0
Protein Red OS=Rattus norvegicus OX=10116 GN=Ik PE=1 SV=1	RED_RAT	Ik	0.102	0.157	0.157	0.102	0.157	0.157	0	0
Guanine nucleotide exchange factor DBS OS=Rattus norvegicus OX=10116 GN=Mcf2l PE=1 SV=3	MCF2L_RAT	Mcf2l	0.0509	0	0	0.0509	0	0	0.0509	0
DnaJ homolog subfamily C member 3 OS=Rattus norvegicus OX=10116 GN=Dnajc3 PE=1 SV=3	DNJC3_RAT	Dnajc3	0	0	0	0	0.248	0	0.117	0.319
Complement component 1 Q subcomponent-binding protein, mitochondrial OS=Rattus norvegicus OX=10116 GN=C1qbp PE=1 SV=2	C1QBP_RAT	C1qbp	0.661	0.661	0.501	0.501	0.839	0.661	0.661	0.501
Growth factor receptor-bound protein 2 OS=Rattus norvegicus OX=10116 GN=Grb2 PE=1 SV=1	GRB2_RAT	Grb2	0.281	0.642	0.45	0.45	0.45	0.642	0.45	0.858
Calpain small subunit 1 OS=Rattus norvegicus OX=10116 GN=Capns1 PE=1 SV=3	CPNS1_RAT	Capns1	0.552	0.934	1.16	0.552	0.733	0.934	0.934	0.733
Glutathione S-transferase Mu 1 OS=Rattus norvegicus OX=10116 GN=Gstm1 PE=1 SV=2	GSTM1_RAT	Gstm1	4.43	2.35	2.35	2.78	2.35	1.07	2.35	1.97
LRP chaperone MESD OS=Rattus norvegicus OX=10116 GN=Mesd PE=2 SV=1	MESD_RAT	Mesd	0.642	0.281	0.45	0.858	0.45	0.45	0.642	1.38
Ras-related protein Ral-A OS=Rattus norvegicus OX=10116 GN=Rala PE=1 SV=1	RALA_RAT	Rala	0.488	0	0	0	0.488	0.303	0.939	0.488
D-beta-hydroxybutyrate dehydrogenase, mitochondrial OS=Rattus norvegicus OX=10116 GN=Bdh1 PE=1 SV=2	BDH_RAT	Bdh1	0.513	0.513	0.18	0.18	0	0.282	0.18	0.18
Parafibromin OS=Rattus norvegicus OX=10116 GN=Cdc73 PE=2 SV=1	CDC73_RAT	Cdc73	0.111	0	0.234	0.171	0.171	0.234	0.111	0
Nuclear pore complex protein Nup54 OS=Rattus norvegicus OX=10116 GN=Nup54 PE=1 SV=1	NUP54_RAT	Nup54	0	0	0	0	0.121	0	0.121	0
Oxidation resistance protein 1 OS=Rattus norvegicus OX=10116 GN=Oxr1 PE=1 SV=3	OXR1_RAT	Oxr1	0	0	0	0	0.0715	0	0.0715	0
DNA-(apurinic or apyrimidinic site) lyase OS=Rattus norvegicus OX=10116 GN=Apex1 PE=1 SV=2	APEX1_RAT	Apex1	0.427	0.559	0.427	0.427	0.305	0.427	0.427	0.427
SAP domain-containing ribonucleoprotein OS=Rattus norvegicus OX=10116 GN=Sarnp PE=1 SV=3	SARNP_RAT	Sarnp	1.87	0.933	1.21	0.933	0.694	0.694	0.933	0.933
Fatty aldehyde dehydrogenase OS=Rattus norvegicus OX=10116 GN=Aldh3a2 PE=1 SV=1	AL3A2_RAT	Aldh3a2	0.193	0.265	0.265	0.193	0.424	0.265	0.265	0.265
DNA primase large subunit OS=Rattus norvegicus OX=10116 GN=Prim2 PE=2 SV=1	PRI2_RAT	Prim2	0.115	0.177	0.115	0.177	0.177	0.177	0.115	0.177
Lipase maturation factor 2 OS=Rattus norvegicus OX=10116 GN=Lmf2 PE=2 SV=1	LMF2_RAT	Lmf2	0.173	0.221	0.127	0.127	0.221	0.083	0.127	0.173
Hippocalcin-like protein 1 OS=Rattus norvegicus OX=10116 GN=Hpcal1 PE=1 SV=2	HPCL1_RAT	Hpcal1	1.01	0.321	0.321	0.321	0.321	0.519	0	0
Protein FAM234A OS=Rattus norvegicus OX=10116 GN=Fam234a PE=1 SV=1	F234A_RAT	Fam234a	0.234	0.111	0.234	0.234	0	0.171	0.171	0.171
COBW domain-containing protein 1 OS=Rattus norvegicus OX=10116 GN=Cbwd1 PE=2 SV=2	CBWD1_RAT	Cbwd1	0.155	0.242	0	0	0	0.155	0	0.155
Putative oxidoreductase GLYR1 OS=Rattus norvegicus OX=10116 GN=Glyr1 PE=1 SV=1	GLYR1_RAT	Glyr1	0	0.172	0.172	0.235	0.235	0.302	0.172	0.111
Tubulin gamma-1 chain OS=Rattus norvegicus OX=10116 GN=Tubg1 PE=2 SV=1	TBG1_RAT	Tubg1	0.205	0.453	0.133	0.453	0.205	0.365	0	0
Cadherin-1 OS=Rattus norvegicus OX=10116 GN=Cdh1 PE=1 SV=1	CADH1_RAT	Cdh1	0	0.102	0	0.0671	0.0671	0	0.0671	0.0671
Exocyst complex component 8 OS=Rattus norvegicus OX=10116 GN=Exoc8 PE=1 SV=1	EXOC8_RAT	Exoc8	0	0	0	0	0.0822	0	0	0
Glycogen phosphorylase, liver form OS=Rattus norvegicus OX=10116 GN=Pygl PE=1 SV=5	PYGL_RAT	Pygl	0.141	0	0	0	0	0	0	0
6-phosphofructo-2-kinase/fructose-2,6-bisphosphatase 2 OS=Rattus norvegicus OX=10116 GN=Pfkfb2 PE=1 SV=1	F262_RAT	Pfkfb2	0	0.105	0.105	0.161	0.22	0.161	0.22	0.105
Copine-1 OS=Rattus norvegicus OX=10116 GN=Cpne1 PE=1 SV=1	CPNE1_RAT	Cpne1	0.242	0.114	0.242	0.242	0.242	0.311	0.242	0.176
CDGSH iron-sulfur domain-containing protein 1 OS=Rattus norvegicus OX=10116 GN=Cisd1 PE=3 SV=1	CISD1_RAT	Cisd1	3.45	1.11	1.71	1.11	2.47	1.11	2.47	1.71
Isocitrate dehydrogenase [NAD] subunit gamma 1, mitochondrial OS=Rattus norvegicus OX=10116 GN=Idh3g PE=1 SV=2	IDHG1_RAT	Idh3g	0.447	0.248	0.159	0.159	0.159	0.344	0.248	0.248
Insulin-1 OS=Rattus norvegicus OX=10116 GN=Ins1 PE=1 SV=1	INS1_RAT	Ins1	2.36	1.07	1.07	1.07	3.29	1.64	1.64	1.64
Ras-related GTP-binding protein B OS=Rattus norvegicus OX=10116 GN=RragB PE=1 SV=1	RRAGB_RAT	RragB	0.443	0.341	0.246	0.443	0.158	0.246	0.443	0.246
Leucine-rich repeat protein SHOC-2 OS=Rattus norvegicus OX=10116 GN=Shoc2 PE=2 SV=1	SHOC2_RAT	Shoc2	0	0.103	0	0.103	0.159	0.103	0	0
A-kinase anchor protein 8 OS=Rattus norvegicus OX=10116 GN=Akap8 PE=1 SV=1	AKAP8_RAT	Akap8	0.134	0.183	0	0.183	0	0.287	0.134	0.134
Pirin OS=Rattus norvegicus OX=10116 GN=Pir PE=1 SV=1	PIR_RAT	Pir	0.982	0.63	0	0.341	0.341	0.341	0	0.478
Protein argonaute-2 OS=Rattus norvegicus OX=10116 GN=Ago2 PE=2 SV=2	AGO2_RAT	Ago2	0	0	0.104	0	0.0682	0	0	0
Proteasome subunit beta type-6 OS=Rattus norvegicus OX=10116 GN=Psmb6 PE=1 SV=3	PSB6_RAT	Psmb6	0.854	0.638	0.638	0.638	0.854	0.638	0.448	0.448
Cytochrome c oxidase subunit 7A2, mitochondrial OS=Rattus norvegicus OX=10116 GN=Cox7a2 PE=1 SV=1	CX7A2_RAT	Cox7a2	5.67	2.54	1.58	2.54	2.54	1.58	2.54	1.58
40S ribosomal protein S20 OS=Rattus norvegicus OX=10116 GN=Rps20 PE=3 SV=1	RS20_RAT	Rps20	2.12	0.978	1.48	1.48	1.48	1.48	1.48	1.48
Casein kinase I isoform alpha OS=Rattus norvegicus OX=10116 GN=Csnk1a1 PE=2 SV=1	KC1A_RAT	Csnk1a1	0.803	0.4	0	0.4	0.183	0.183	0.183	0.183
Keratin, type II cytoskeletal 1b OS=Rattus norvegicus OX=10116 GN=Krt77 PE=3 SV=1	K2C1B_RAT	Krt77	0	0.321	0	0.321	0.477	0.477	0	0
ADP-ribosylation factor GTPase-activating protein 3 OS=Rattus norvegicus OX=10116 GN=Arfgap3 PE=1 SV=1	ARFG3_RAT	Arfgap3	0	0.18	0	0	0.18	0.117	0	0
Choline dehydrogenase, mitochondrial OS=Rattus norvegicus OX=10116 GN=Chdh PE=1 SV=1	CHDH_RAT	Chdh	0.212	0.155	0.272	0.155	0.155	0.155	0.101	0
CCR4-NOT transcription complex subunit 10 OS=Rattus norvegicus OX=10116 GN=Cnot10 PE=2 SV=1	CNO10_RAT	Cnot10	0	0	0	0	0.0814	0	0	0
Nicastrin OS=Rattus norvegicus OX=10116 GN=Ncstn PE=1 SV=1	NICA_RAT	Ncstn	0.331	0.177	0	0.13	0.13	0.085	0.13	0.277
ADP-ribosylation factor-like protein 3 OS=Rattus norvegicus OX=10116 GN=Arl3 PE=1 SV=2	ARL3_RAT	Arl3	1.48	0.576	1.48	0	1.48	0.834	1.48	2.92
Cytochrome c oxidase subunit 6C-2 OS=Rattus norvegicus OX=10116 GN=Cox6c2 PE=1 SV=3	CX6C2_RAT	Cox6c2	1.83	0	0	0	0	0	0	1.83
Serine/threonine-protein phosphatase 5 OS=Rattus norvegicus OX=10116 GN=Ppp5c PE=1 SV=1	PPP5_RAT	Ppp5c	0.119	0.119	0.183	0.119	0.251	0.119	0.183	0.119
Alanyl-tRNA editing protein Aarsd1 OS=Rattus norvegicus OX=10116 GN=Aarsd1 PE=1 SV=1	AASD1_RAT	Aarsd1	0	0.422	0.151	0.422	0.325	0.235	0.235	0
Protein IWS1 homolog OS=Rattus norvegicus OX=10116 GN=Iws1 PE=1 SV=1	IWS1_RAT	Iws1	0.0779	0	0	0	0	0	0	0
Inosine triphosphate pyrophosphatase OS=Rattus norvegicus OX=10116 GN=Itpa PE=3 SV=1	ITPA_RAT	Itpa	1.7	1.35	1.03	0.531	1.03	1.03	0.765	1.03
Signal peptidase complex catalytic subunit SEC11A OS=Rattus norvegicus OX=10116 GN=Sec11a PE=2 SV=1	SC11A_RAT	Sec11a	1.47	1.13	1.47	1.13	1.47	0.573	0.829	1.13
Cytochrome b5 OS=Rattus norvegicus OX=10116 GN=Cyb5a PE=1 SV=2	CYB5_RAT	Cyb5a	3.04	1.22	2.31	1.22	1.22	1.22	1.22	1.71
Mitochondrial import receptor subunit TOM40 homolog OS=Rattus norvegicus OX=10116 GN=Tomm40 PE=1 SV=1	TOM40_RAT	Tomm40	0.182	0.285	0.182	0.182	0.182	0.285	0.396	0.396
Coiled-coil domain-containing protein 22 OS=Rattus norvegicus OX=10116 GN=Ccdc22 PE=1 SV=2	CCD22_RAT	Ccdc22	0	0	0	0	0.145	0.0944	0	0
28S ribosomal protein S7, mitochondrial OS=Rattus norvegicus OX=10116 GN=Mrps7 PE=2 SV=2	RT07_RAT	Mrps7	0.249	0	0	0	0	0	0	0
Serine/threonine-protein kinase DCLK2 OS=Rattus norvegicus OX=10116 GN=Dclk2 PE=1 SV=2	DCLK2_RAT	Dclk2	0	0	0	0	0.121	0	0	0
Serine/threonine-protein phosphatase 2A catalytic subunit beta isoform OS=Rattus norvegicus OX=10116 GN=Ppp2cb PE=2 SV=1	PP2AB_RAT	Ppp2cb	0.559	0.305	0.427	0.427	0.305	0.305	0.704	0.559
Palmitoyl-protein thioesterase 1 OS=Rattus norvegicus OX=10116 GN=Ppt1 PE=1 SV=1	PPT1_RAT	Ppt1	0.733	0.316	0.443	0.443	0.316	0.316	0.443	0.316
ES1 protein homolog, mitochondrial OS=Rattus norvegicus OX=10116 PE=1 SV=2	ES1_RAT		0.56	0.56	0.56	0.56	0.396	0.396	0.56	0.56
Chromatin target of PRMT1 protein OS=Rattus norvegicus OX=10116 GN=Chtop PE=2 SV=1	CHTOP_RAT	Chtop	0	0.266	0	0.424	0.266	0.266	0	0.266
Isopentenyl-diphosphate Delta-isomerase 1 OS=Rattus norvegicus OX=10116 GN=Idi1 PE=2 SV=2	IDI1_RAT	Idi1	0.606	0.426	0.267	0	0	0.267	0.267	0.267
Interferon-stimulated 20 kDa exonuclease-like 2 OS=Rattus norvegicus OX=10116 GN=Isg20l2 PE=2 SV=1	I20L2_RAT	Isg20l2	0	0	0.166	0	0	0	0	0
Rho GTPase-activating protein 17 OS=Rattus norvegicus OX=10116 GN=Arhgap17 PE=1 SV=1	RHG17_RAT	Arhgap17	0.108	0	0	0.0708	0.147	0	0	0
Profilin-2 OS=Rattus norvegicus OX=10116 GN=Pfn2 PE=1 SV=3	PROF2_RAT	Pfn2	1.26	1.26	0.842	0.503	1.26	0.503	1.26	1.77
Carcinoembryonic antigen-related cell adhesion molecule 1 OS=Rattus norvegicus OX=10116 GN=Ceacam1 PE=1 SV=4	CEAM1_RAT	Ceacam1	0.249	0.32	0.249	0.32	0.181	0.181	0.249	0
Synaptosomal-associated protein 25 OS=Rattus norvegicus OX=10116 GN=Snap25 PE=1 SV=1	SNP25_RAT	Snap25	0	0.706	0	0.306	0	0.95	0.306	0.306
28S ribosomal protein S31, mitochondrial OS=Rattus norvegicus OX=10116 GN=Mrps31 PE=2 SV=1	RT31_RAT	Mrps31	0.242	0	0	0.242	0	0	0	0
Putative Dol-P-Glc:Glc(2)Man(9)GlcNAc(2)-PP-Dol alpha-1,2-glucosyltransferase OS=Rattus norvegicus OX=10116 GN=Alg10b PE=1 SV=1	AG10B_RAT	Alg10b	0	0	0.188	0.258	0.122	0.188	0.122	0
Meiosis-specific with OB domain-containing protein OS=Rattus norvegicus OX=10116 GN=Meiob PE=2 SV=1	MEIOB_RAT	Meiob	0	0.128	0	0	0	0	0	0
Protein mago nashi homolog OS=Rattus norvegicus OX=10116 GN=Magoh PE=2 SV=1	MGN_RAT	Magoh	1.92	1.44	1.04	1.44	1.44	1.92	1.44	2.49
Dihydrolipoyllysine-residue succinyltransferase component of 2-oxoglutarate dehydrogenase complex, mitochondrial OS=Rattus norvegicus OX=10116 GN=Dlst PE=1 SV=2	ODO2_RAT	Dlst	0.297	0.297	0.384	0.384	0.215	0.297	0.297	0.297
Aldehyde dehydrogenase family 16 member A1 OS=Rattus norvegicus OX=10116 GN=Aldh16a1 PE=2 SV=1	A16A1_RAT	Aldh16a1	0.206	0.119	0.119	0.162	0.252	0.162	0.119	0.119
Cytochrome c oxidase subunit 5B, mitochondrial OS=Rattus norvegicus OX=10116 GN=Cox5b PE=1 SV=2	COX5B_RAT	Cox5b	1.4	1.4	0.928	1.4	0.928	1.4	1.4	1.99
Cellular retinoic acid-binding protein 1 OS=Rattus norvegicus OX=10116 GN=Crabp1 PE=1 SV=3	RABP1_RAT	Crabp1	2.96	1.67	0.804	0.482	0.482	1.67	0.482	1.67
cGMP-dependent 3',5'-cyclic phosphodiesterase OS=Rattus norvegicus OX=10116 GN=Pde2a PE=1 SV=2	PDE2A_RAT	Pde2a	0.166	0.0633	0.0964	0.0964	0.0633	0.0633	0.0964	0.0633
28 kDa heat- and acid-stable phosphoprotein OS=Rattus norvegicus OX=10116 GN=Pdap1 PE=1 SV=1	HAP28_RAT	Pdap1	0	0.823	0.35	0.569	0.569	0.569	0.569	0.823
Saccharopine dehydrogenase-like oxidoreductase OS=Rattus norvegicus OX=10116 GN=Sccpdh PE=1 SV=1	SCPDL_RAT	Sccpdh	0	0.401	0.224	0.31	0.401	0.31	0.401	0.224
Lamin-B receptor OS=Rattus norvegicus OX=10116 GN=Lbr PE=1 SV=1	LBR_RAT	Lbr	0.0946	0.0946	0.145	0.0946	0.0946	0.145	0.0946	0.145
Protein FAM3C OS=Rattus norvegicus OX=10116 GN=Fam3c PE=2 SV=1	FAM3C_RAT	Fam3c	0.656	0	0.878	0.287	0.878	0.46	0.656	0.46
Carbohydrate-responsive element-binding protein OS=Rattus norvegicus OX=10116 GN=Mlxipl PE=1 SV=1	MLXPL_RAT	Mlxipl	0	0.107	0.145	0.107	0.107	0.107	0.0699	0.0699
Catalase OS=Rattus norvegicus OX=10116 GN=Cat PE=1 SV=3	CATA_RAT	Cat	0.113	0.113	0.174	0	0.174	0.174	0	0.113
Protein ABHD16A OS=Rattus norvegicus OX=10116 GN=Abhd16a PE=2 SV=1	ABHGA_RAT	Abhd16a	0	0	0	0	0	0.106	0	0
Nuclear RNA export factor 1 OS=Rattus norvegicus OX=10116 GN=Nxf1 PE=2 SV=1	NXF1_RAT	Nxf1	0.0952	0.146	0	0	0.0952	0.146	0	0
ER lumen protein-retaining receptor 2 OS=Rattus norvegicus OX=10116 GN=Kdelr2 PE=2 SV=1	ERD22_RAT	Kdelr2	0.467	0.467	0	0	1.15	0.291	0.291	0
Serine/arginine-rich splicing factor 9 OS=Rattus norvegicus OX=10116 GN=Srsf9 PE=1 SV=1	SRSF9_RAT	Srsf9	0.444	0.277	0.444	0.277	0	0.277	0.632	0.277
Cadherin-23 OS=Rattus norvegicus OX=10116 GN=Cdh23 PE=2 SV=1	CAD23_RAT	Cdh23	0	0	0.036	0	0	0	0	0
Nucleolar GTP-binding protein 1 OS=Rattus norvegicus OX=10116 GN=Gtpbp4 PE=2 SV=3	NOG1_RAT	Gtpbp4	0	0.0899	0	0	0	0	0	0
Guanine nucleotide-binding protein-like 3 OS=Rattus norvegicus OX=10116 GN=Gnl3 PE=1 SV=1	GNL3_RAT	Gnl3	0	0.111	0.111	0	0.171	0	0.111	0
ATP-binding cassette sub-family F member 3 OS=Rattus norvegicus OX=10116 GN=Abcf3 PE=2 SV=1	ABCF3_RAT	Abcf3	0.0835	0.128	0.174	0	0.0835	0	0	0
Exocyst complex component 7 OS=Rattus norvegicus OX=10116 GN=Exoc7 PE=1 SV=1	EXOC7_RAT	Exoc7	0	0.0889	0	0	0.0889	0	0	0
Thioredoxin-dependent peroxide reductase, mitochondrial OS=Rattus norvegicus OX=10116 GN=Prdx3 PE=1 SV=2	PRDX3_RAT	Prdx3	1.17	0.557	0.74	0.394	0.74	0.557	0.557	0.557
cAMP-dependent protein kinase catalytic subunit alpha OS=Rattus norvegicus OX=10116 GN=Prkaca PE=1 SV=2	KAPCA_RAT	Prkaca	3.06	1.75	0.865	1.55	1.55	1.36	1.36	1.55
Mothers against decapentaplegic homolog 2 OS=Rattus norvegicus OX=10116 GN=Smad2 PE=1 SV=1	SMAD2_RAT	Smad2	0.13	0.201	0.13	0.356	0.356	0.276	0.276	0.201
Transmembrane protein 206 OS=Rattus norvegicus OX=10116 GN=Tmem206 PE=1 SV=1	TM206_RAT	Tmem206	0.267	0.484	0	0.267	0	0	0.267	0.267
E3 ubiquitin-protein ligase HUWE1 (Fragment) OS=Rattus norvegicus OX=10116 GN=Huwe1 PE=1 SV=2	HUWE1_RAT	Huwe1	0.527	0.403	0.289	0.527	0.969	0	0.403	0.403
Programmed cell death protein 10 OS=Rattus norvegicus OX=10116 GN=Pdcd10 PE=2 SV=1	PDC10_RAT	Pdcd10	0.293	0	0.47	0	0	0	0.47	0.47
Zinc finger protein 148 OS=Rattus norvegicus OX=10116 GN=Znf148 PE=1 SV=1	ZN148_RAT	Znf148	0	0	0	0.0749	0.0749	0	0	0
Heat shock 70 kDa protein 14 OS=Rattus norvegicus OX=10116 GN=Hspa14 PE=2 SV=1	HSP7E_RAT	Hspa14	0.124	0.264	0	0	0	0.192	0	0
Biliverdin reductase A OS=Rattus norvegicus OX=10116 GN=Blvra PE=1 SV=1	BIEA_RAT	Blvra	0.326	0.456	0.207	0.456	0.207	0.6	0.931	0.6
PRKCA-binding protein OS=Rattus norvegicus OX=10116 GN=Pick1 PE=1 SV=1	PICK1_RAT	Pick1	0.313	0.146	0.227	0.146	0.313	0.313	0	0.146
Glutamine synthetase OS=Rattus norvegicus OX=10116 GN=Glul PE=1 SV=3	GLNA_RAT	Glul	0.349	0.252	0.349	0.349	0	0.349	0.252	0.162
Peptidyl-prolyl cis-trans isomerase FKBP8 OS=Rattus norvegicus OX=10116 GN=Fkbp8 PE=2 SV=1	FKBP8_RAT	Fkbp8	0.244	0.157	0	0.244	0	0	0.157	0.157
Mitogen-activated protein kinase 9 OS=Rattus norvegicus OX=10116 GN=Mapk9 PE=1 SV=1	MK09_RAT	Mapk9	0	0	0.22	0.22	0.22	0.22	0.22	0
Leucine carboxyl methyltransferase 1 OS=Rattus norvegicus OX=10116 GN=Lcmt1 PE=2 SV=1	LCMT1_RAT	Lcmt1	0.391	0.281	0	0.281	0	0.179	0.281	0.391
SWI/SNF-related matrix-associated actin-dependent regulator of chromatin subfamily D member 2 OS=Rattus norvegicus OX=10116 GN=Smarcd2 PE=1 SV=3	SMRD2_RAT	Smarcd2	0	0.241	0.176	0.241	0	0.176	0.114	0.114
Retinoid-inducible serine carboxypeptidase OS=Rattus norvegicus OX=10116 GN=Scpep1 PE=2 SV=1	RISC_RAT	Scpep1	0.364	0.205	0	0.132	0	0.132	0.205	0.364
Rab3 GTPase-activating protein non-catalytic subunit OS=Rattus norvegicus OX=10116 GN=Rab3gap2 PE=1 SV=2	RBGPR_RAT	Rab3gap2	0.133	0	0	0.0645	0	0	0	0
Methylthioribose-1-phosphate isomerase OS=Rattus norvegicus OX=10116 GN=Mri1 PE=1 SV=1	MTNA_RAT	Mri1	0.271	0.377	0.174	0.377	0.271	0.377	0.377	0.492
Acylpyruvase FAHD1, mitochondrial OS=Rattus norvegicus OX=10116 GN=Fahd1 PE=1 SV=1	FAHD1_RAT	Fahd1	0.467	0.667	0.667	0.467	0.291	0.467	1.45	0.667
Armadillo repeat-containing protein 10 OS=Rattus norvegicus OX=10116 GN=Armc10 PE=1 SV=1	ARM10_RAT	Armc10	0.327	0.208	0.208	0.327	0	0.208	0.327	0.327
Nucleolar protein 16 OS=Rattus norvegicus OX=10116 GN=Nop16 PE=2 SV=1	NOP16_RAT	Nop16	0.342	0.342	0	0	0	0.342	0.555	0
Eukaryotic translation initiation factor 6 OS=Rattus norvegicus OX=10116 GN=Eif6 PE=1 SV=1	IF6_RAT	Eif6	0.603	0.424	0.603	0	0.424	0.603	0.424	0.603
Hydroxyacylglutathione hydrolase, mitochondrial OS=Rattus norvegicus OX=10116 GN=Hagh PE=1 SV=2	GLO2_RAT	Hagh	0.32	0	0.32	0.32	0.32	0	0.32	0.448
Ciliary neurotrophic factor receptor subunit alpha OS=Rattus norvegicus OX=10116 GN=Cntfr PE=2 SV=2	CNTFR_RAT	Cntfr	0.262	0.168	0.363	0.363	0.262	0.363	0.168	0
V-type proton ATPase 16 kDa proteolipid subunit OS=Rattus norvegicus OX=10116 GN=Atp6v0c PE=2 SV=1	VATL_RAT	Atp6v0c	0.79	0.79	0	0	0	0	0	0
Calcium/calmodulin-dependent protein kinase type 1 OS=Rattus norvegicus OX=10116 GN=Camk1 PE=1 SV=2	KCC1A_RAT	Camk1	0.164	0.256	0	0.463	0	0	0.256	0.356
4-aminobutyrate aminotransferase, mitochondrial OS=Rattus norvegicus OX=10116 GN=Abat PE=1 SV=3	GABT_RAT	Abat	0.12	0.12	0	0.185	0.185	0.12	0.253	0.185
ADP-ribosylation factor GTPase-activating protein 2 OS=Rattus norvegicus OX=10116 GN=Arfgap2 PE=1 SV=1	ARFG2_RAT	Arfgap2	0	0.119	0.253	0	0.326	0.119	0	0
Apoptosis regulator BAX OS=Rattus norvegicus OX=10116 GN=Bax PE=1 SV=2	BAX_RAT	Bax	1.77	0.548	1.07	1.07	0.79	1.07	1.07	0.79
Dolichyl-diphosphooligosaccharide--protein glycosyltransferase subunit DAD1 OS=Rattus norvegicus OX=10116 GN=Dad1 PE=3 SV=3	DAD1_RAT	Dad1	1.06	1.06	1.62	1.06	2.33	1.06	1.62	2.33
NADH dehydrogenase [ubiquinone] flavoprotein 2, mitochondrial OS=Rattus norvegicus OX=10116 GN=Ndufv2 PE=1 SV=2	NDUV2_RAT	Ndufv2	0.99	0.774	0.582	0.582	0.582	0.582	0.582	1.23
MOB-like protein phocein OS=Rattus norvegicus OX=10116 GN=Mob4 PE=1 SV=1	PHOCN_RAT	Mob4	0.435	0.435	0.435	0.435	0.618	0.435	0.618	0.825
Peroxiredoxin-4 OS=Rattus norvegicus OX=10116 GN=Prdx4 PE=2 SV=1	PRDX4_RAT	Prdx4	0	0.661	0	0.839	0.661	0.839	1.04	1.25
Mitochondrial-processing peptidase subunit beta OS=Rattus norvegicus OX=10116 GN=Pmpcb PE=1 SV=3	MPPB_RAT	Pmpcb	0.124	0.422	0.264	0.422	0.264	0.422	0.422	0.264
Serine/threonine-protein kinase PAK 1 OS=Rattus norvegicus OX=10116 GN=Pak1 PE=1 SV=3	PAK1_RAT	Pak1	0	0	0.301	0.301	0	0	0	0
Synembryn-A OS=Rattus norvegicus OX=10116 GN=Ric8a PE=1 SV=2	RIC8A_RAT	Ric8a	0	0	0.112	0	0.173	0.173	0.112	0
Pescadillo homolog OS=Rattus norvegicus OX=10116 GN=Pes1 PE=2 SV=1	PESC_RAT	Pes1	0	0	0.152	0.0991	0	0	0	0
Niban-like protein 1 OS=Rattus norvegicus OX=10116 GN=Fam129b PE=1 SV=1	NIBL1_RAT	Fam129b	0.0785	0	0.0785	0	0	0.0785	0.0785	0.0785
Prostaglandin reductase 2 OS=Rattus norvegicus OX=10116 GN=Ptgr2 PE=2 SV=2	PTGR2_RAT	Ptgr2	0.181	0.394	0	0.283	0.283	0.181	0.514	0.394
Vacuolar protein sorting-associated protein 52 homolog OS=Rattus norvegicus OX=10116 GN=Vps52 PE=2 SV=2	VPS52_RAT	Vps52	0.215	0	0	0	0	0.0811	0	0
Programmed cell death protein 6 OS=Rattus norvegicus OX=10116 GN=Pdcd6 PE=2 SV=1	PDCD6_RAT	Pdcd6	1.03	0.329	0.531	0.329	1.03	0.765	0.531	0.765
Junction plakoglobin OS=Rattus norvegicus OX=10116 GN=Jup PE=1 SV=1	PLAK_RAT	Jup	0.125	0.17	0.0815	0.125	0.0815	0.17	0.0815	0.0815
Replication factor C subunit 2 OS=Rattus norvegicus OX=10116 GN=Rfc2 PE=2 SV=1	RFC2_RAT	Rfc2	0.634	0.387	0.178	0.387	0.278	0	0.387	0.387
Transcription initiation factor IIB OS=Rattus norvegicus OX=10116 GN=Gtf2b PE=2 SV=1	TF2B_RAT	Gtf2b	0.574	0.199	0.199	0.313	0	0	0.199	0.438
Probable ATP-dependent RNA helicase DHX40 OS=Rattus norvegicus OX=10116 GN=Dhx40 PE=2 SV=1	DHX40_RAT	Dhx40	0	0.0751	0.0751	0	0.0751	0	0.0751	0
Nischarin OS=Rattus norvegicus OX=10116 GN=Nisch PE=2 SV=2	NISCH_RAT	Nisch	0.0394	0.0394	0.0394	0.0394	0	0	0	0.0597
SH3 and multiple ankyrin repeat domains protein 1 OS=Rattus norvegicus OX=10116 GN=Shank1 PE=1 SV=1	SHAN1_RAT	Shank1	0	0	0	0	0	0.0289	0	0
Anaphase-promoting complex subunit 5 OS=Rattus norvegicus OX=10116 GN=Anapc5 PE=2 SV=1	APC5_RAT	Anapc5	0	0.0815	0.0815	0.0815	0.0815	0.125	0	0
Translation initiation factor eIF-2B subunit alpha OS=Rattus norvegicus OX=10116 GN=Eif2b1 PE=2 SV=1	EI2BA_RAT	Eif2b1	0.597	0.324	0	0.754	0	0.324	0	0
Peflin OS=Rattus norvegicus OX=10116 GN=Pef1 PE=2 SV=1	PEF1_RAT	Pef1	0.689	0.689	0.369	0.875	0.689	0.521	0.875	0.521
Thioredoxin OS=Rattus norvegicus OX=10116 GN=Txn PE=1 SV=2	THIO_RAT	Txn	1.17	2.63	2.63	2.63	2.63	1.8	1.8	2.63
Uroporphyrinogen decarboxylase (Fragment) OS=Rattus norvegicus OX=10116 GN=Urod PE=1 SV=1	DCUP_RAT	Urod	0.479	0.479	0.479	0.368	0.368	0.368	0.368	0.17
GPI transamidase component PIG-S OS=Rattus norvegicus OX=10116 GN=Pigs PE=2 SV=3	PIGS_RAT	Pigs	0.109	0.23	0.168	0.295	0.295	0.168	0.168	0.23
Vacuolar protein-sorting-associated protein 25 OS=Rattus norvegicus OX=10116 GN=Vps25 PE=1 SV=1	VPS25_RAT	Vps25	1.11	0	0.348	0.348	1.45	0.348	0.348	1.45
Transmembrane emp24 domain-containing protein 9 OS=Rattus norvegicus OX=10116 GN=Tmed9 PE=1 SV=1	TMED9_RAT	Tmed9	0.786	0	0.591	0.261	0.591	0.591	0.786	0.591
Serine/threonine-protein phosphatase 2A 55 kDa regulatory subunit B alpha isoform OS=Rattus norvegicus OX=10116 GN=Ppp2r2a PE=2 SV=1	2ABA_RAT	Ppp2r2a	0.203	0.203	0.131	0.131	0	0	0.203	0.203
Kynurenine--oxoglutarate transaminase 1, mitochondrial OS=Rattus norvegicus OX=10116 GN=Kyat1 PE=1 SV=1	KAT1_RAT	Kyat1	0.131	0.131	0.131	0.131	0.131	0	0.203	0.203
Protein NDRG3 OS=Rattus norvegicus OX=10116 GN=Ndrg3 PE=1 SV=1	NDRG3_RAT	Ndrg3	0	0.357	0.257	0.58	0.257	0.464	0.357	0.464
Transcription factor A, mitochondrial OS=Rattus norvegicus OX=10116 GN=Tfam PE=2 SV=1	TFAM_RAT	Tfam	0.744	0	0.249	0	0.56	0	0.249	0.396
Sarcolemmal membrane-associated protein OS=Rattus norvegicus OX=10116 GN=Slmap PE=1 SV=1	SLMAP_RAT	Slmap	0	0	0	0.0675	0	0	0	0
Pyrroline-5-carboxylate reductase 2 OS=Rattus norvegicus OX=10116 GN=Pycr2 PE=2 SV=1	P5CR2_RAT	Pycr2	0.754	0.324	0	0.455	0	0.455	0.324	0.754
Stromal interaction molecule 1 OS=Rattus norvegicus OX=10116 GN=Stim1 PE=1 SV=1	STIM1_RAT	Stim1	0	0	0.18	0.132	0.132	0.132	0	0
ZW10 interactor OS=Rattus norvegicus OX=10116 GN=Zwint PE=1 SV=1	ZWINT_RAT	Zwint	0	0	0	0	0	0.368	0	0
Copper chaperone for superoxide dismutase OS=Rattus norvegicus OX=10116 GN=Ccs PE=1 SV=1	CCS_RAT	Ccs	0.243	0.243	0.243	0.243	0.243	0.243	0.243	0.386
Small ubiquitin-related modifier 2 OS=Rattus norvegicus OX=10116 GN=Sumo2 PE=1 SV=1	SUMO2_RAT	Sumo2	0.732	0.732	0.732	0.732	0.732	0.732	0.732	0.732
SWI/SNF-related matrix-associated actin-dependent regulator of chromatin subfamily E member 1 OS=Rattus norvegicus OX=10116 GN=Smarce1 PE=1 SV=1	SMCE1_RAT	Smarce1	0.344	0.344	0.159	0.248	0.248	0.159	0	0.248
Striatin OS=Rattus norvegicus OX=10116 GN=Strn PE=1 SV=1	STRN_RAT	Strn	0.0772	0	0.0772	0.118	0.16	0.118	0	0
5'-AMP-activated protein kinase catalytic subunit alpha-1 OS=Rattus norvegicus OX=10116 GN=Prkaa1 PE=1 SV=2	AAPK1_RAT	Prkaa1	0	0.105	0.105	0.105	0.105	0.105	0.105	0.105
Cytochrome P450 4F1 OS=Rattus norvegicus OX=10116 GN=Cyp4f1 PE=2 SV=1	CP4F1_RAT	Cyp4f1	0.112	0.112	0.173	0.112	0.112	0	0	0.112
STE20/SPS1-related proline-alanine-rich protein kinase OS=Rattus norvegicus OX=10116 GN=Stk39 PE=1 SV=2	STK39_RAT	Stk39	0	0	0	0	0	0.173	0	0
Proto-oncogene tyrosine-protein kinase Src OS=Rattus norvegicus OX=10116 GN=Src PE=1 SV=4	SRC_RAT	Src	0	0.173	0.173	0.237	0.173	0.237	0	0
Acetyl-coenzyme A transporter 1 OS=Rattus norvegicus OX=10116 GN=Slc33a1 PE=2 SV=1	ACATN_RAT	Slc33a1	0.11	0.11	0	0.11	0.11	0.11	0.17	0
Thyroid hormone receptor alpha OS=Rattus norvegicus OX=10116 GN=Thra PE=1 SV=1	THA_RAT	Thra	0	0	0	0	0	0	0	0.123
Dual oxidase 1 OS=Rattus norvegicus OX=10116 GN=Duox1 PE=1 SV=1	DUOX1_RAT	Duox1	0	0	0	0	0	0	0.037	0
Cytoplasmic dynein 1 light intermediate chain 2 OS=Rattus norvegicus OX=10116 GN=Dync1li2 PE=1 SV=1	DC1L2_RAT	Dync1li2	0.123	0	0	0	0	0	0	0
RILP-like protein 1 OS=Rattus norvegicus OX=10116 GN=Rilpl1 PE=1 SV=1	RIPL1_RAT	Rilpl1	0	0	0.144	0	0.144	0.223	0.144	0
Platelet-activating factor acetylhydrolase IB subunit gamma OS=Rattus norvegicus OX=10116 GN=Pafah1b3 PE=2 SV=1	PA1B3_RAT	Pafah1b3	0.437	0.437	0.622	0.622	0.437	0.622	1.07	1.07
Receptor expression-enhancing protein 6 OS=Rattus norvegicus OX=10116 GN=Reep6 PE=2 SV=1	REEP6_RAT	Reep6	0.95	0.95	1.55	0.95	1.23	0.706	0.95	0.95
Single-stranded DNA-binding protein, mitochondrial OS=Rattus norvegicus OX=10116 GN=Ssbp1 PE=1 SV=2	SSBP_RAT	Ssbp1	1.03	0.698	0.698	0.698	1.88	0.698	0.698	0.698
V-type proton ATPase subunit F OS=Rattus norvegicus OX=10116 GN=Atp6v1f PE=1 SV=1	VATF_RAT	Atp6v1f	2.12	2.12	2.12	2.91	2.91	2.12	2.12	2.12
Protein ABHD14B OS=Rattus norvegicus OX=10116 GN=Abhd14b PE=2 SV=1	ABHEB_RAT	Abhd14b	1.28	1.28	0.51	0.732	0.732	0.51	0.732	0.51
Serine/threonine-protein phosphatase 6 catalytic subunit OS=Rattus norvegicus OX=10116 GN=Ppp6c PE=2 SV=2	PPP6_RAT	Ppp6c	0.565	0.431	0.712	0.431	0.309	0.431	0.431	0.565
Plasminogen receptor (KT) OS=Rattus norvegicus OX=10116 GN=Plgrkt PE=1 SV=1	PLRKT_RAT	Plgrkt	0.703	0.703	0.426	0.703	0.426	0.703	0.703	0.703
SUMO-conjugating enzyme UBC9 OS=Rattus norvegicus OX=10116 GN=Ube2i PE=1 SV=1	UBC9_RAT	Ube2i	0.984	0	0.672	0.672	0.672	0.672	0.672	0.984
Translocating chain-associated membrane protein 1 OS=Rattus norvegicus OX=10116 GN=Tram1 PE=1 SV=3	TRAM1_RAT	Tram1	0	0.159	0.159	0.159	0	0.159	0.248	0.159
Sorting nexin-3 OS=Rattus norvegicus OX=10116 GN=Snx3 PE=1 SV=1	SNX3_RAT	Snx3	3.4	0.931	0.638	0.39	0.638	0.638	0.39	0.39
Omega-amidase NIT2 OS=Rattus norvegicus OX=10116 GN=Nit2 PE=1 SV=1	NIT2_RAT	Nit2	0.85	0.67	0.228	0.507	0	0.507	0.36	0.36
Kinesin light chain 4 OS=Rattus norvegicus OX=10116 GN=Klc4 PE=1 SV=1	KLC4_RAT	Klc4	0	0.0971	0	0.149	0.204	0.204	0.204	0
Flotillin-1 OS=Rattus norvegicus OX=10116 GN=Flot1 PE=2 SV=2	FLOT1_RAT	Flot1	0	0	0.143	0.222	0.222	0	0.222	0
Stathmin-2 OS=Rattus norvegicus OX=10116 GN=Stmn2 PE=1 SV=2	STMN2_RAT	Stmn2	1.11	0	0	0.565	0	0	0.817	0.817
Ribosomal oxygenase 2 OS=Rattus norvegicus OX=10116 GN=Riox2 PE=2 SV=1	RIOX2_RAT	Riox2	0	0.197	0.197	0.127	0	0.127	0	0
Calcium/calmodulin-dependent 3',5'-cyclic nucleotide phosphodiesterase 1C OS=Rattus norvegicus OX=10116 GN=Pde1c PE=1 SV=1	PDE1C_RAT	Pde1c	0	0	0	0	0.117	0	0	0
N(G),N(G)-dimethylarginine dimethylaminohydrolase 2 OS=Rattus norvegicus OX=10116 GN=Ddah2 PE=1 SV=1	DDAH2_RAT	Ddah2	1.1	0.698	0.374	0.528	0.698	0.528	0.698	0.888
Pre-mRNA-splicing factor 38B OS=Rattus norvegicus OX=10116 GN=Prpf38b PE=1 SV=1	PR38B_RAT	Prpf38b	0	0	0	0.105	0	0	0.105	0
Syntaxin-7 OS=Rattus norvegicus OX=10116 GN=Stx7 PE=1 SV=4	STX7_RAT	Stx7	0	0	0	0.234	0.234	0	0	0
Purine nucleoside phosphorylase OS=Rattus norvegicus OX=10116 GN=Pnp PE=1 SV=1	PNPH_RAT	Pnp	0.628	0.477	0	0.339	0	0.628	0.628	1.18
SH3 domain-binding protein 1 OS=Rattus norvegicus OX=10116 GN=Sh3bp1 PE=1 SV=1	3BP1_RAT	Sh3bp1	0	0.0892	0	0	0	0	0	0
Inositol monophosphatase 3 OS=Rattus norvegicus OX=10116 GN=Impad1 PE=3 SV=1	IMPA3_RAT	Impad1	0.178	0.279	0	0.178	0.279	0.178	0	0
Synapsin-1 OS=Rattus norvegicus OX=10116 GN=Syn1 PE=1 SV=3	SYN1_RAT	Syn1	0	0	0	0.0903	0.0903	0.0903	0	0
Focal adhesion kinase 1 OS=Rattus norvegicus OX=10116 GN=Ptk2 PE=1 SV=1	FAK1_RAT	Ptk2	0	0	0.0551	0	0	0	0	0
Neurofascin OS=Rattus norvegicus OX=10116 GN=Nfasc PE=1 SV=2	NFASC_RAT	Nfasc	0.0477	0	0	0	0	0	0	0
Acyl-protein thioesterase 2 OS=Rattus norvegicus OX=10116 GN=Lypla2 PE=1 SV=1	LYPA2_RAT	Lypla2	0.46	0.287	0.46	0.656	0.46	0.287	0.656	0.656
ADP-ribosylation factor GTPase-activating protein 1 OS=Rattus norvegicus OX=10116 GN=Arfgap1 PE=1 SV=1	ARFG1_RAT	Arfgap1	0.233	0.15	0	0.15	0.233	0	0.15	0.233
NADH dehydrogenase [ubiquinone] 1 alpha subcomplex assembly factor 4 OS=Rattus norvegicus OX=10116 GN=Ndufaf4 PE=1 SV=1	NDUF4_RAT	Ndufaf4	0.361	0	0.361	0	0.361	0	0	0
Tropomodulin-2 OS=Rattus norvegicus OX=10116 GN=Tmod2 PE=1 SV=1	TMOD2_RAT	Tmod2	0.271	0	0	0	0	0	0.174	0
Lon protease homolog 2, peroxisomal OS=Rattus norvegicus OX=10116 GN=Lonp2 PE=1 SV=2	LONP2_RAT	Lonp2	0.0703	0	0	0.107	0	0	0	0
Nuclear pore complex protein Nup50 OS=Rattus norvegicus OX=10116 GN=Nup50 PE=2 SV=2	NUP50_RAT	Nup50	0	0.211	0	0.136	0.136	0.211	0	0.136
Basic leucine zipper and W2 domain-containing protein 1 OS=Rattus norvegicus OX=10116 GN=Bzw1 PE=1 SV=1	BZW1_RAT	Bzw1	0	0	0	0	0	0.141	0.141	0
Integrin-linked protein kinase OS=Rattus norvegicus OX=10116 GN=Ilk PE=2 SV=1	ILK_RAT	Ilk	0	0.204	0.132	0.281	0	0.132	0	0
Interferon-induced, double-stranded RNA-activated protein kinase OS=Rattus norvegicus OX=10116 GN=Eif2ak2 PE=1 SV=1	E2AK2_RAT	Eif2ak2	0	0.116	0.116	0.116	0.244	0.178	0	0.116
Zinc finger CCCH domain-containing protein 15 OS=Rattus norvegicus OX=10116 GN=Zc3h15 PE=1 SV=1	ZC3HF_RAT	Zc3h15	0	0.141	0	0.141	0	0.141	0	0
DNA-directed RNA polymerases I, II, and III subunit RPABC1 OS=Rattus norvegicus OX=10116 GN=Polr2e PE=2 SV=1	RPAB1_RAT	Polr2e	0	0	0	0	0	0.29	0	0.465
COP9 signalosome complex subunit 8 OS=Rattus norvegicus OX=10116 GN=Cops8 PE=2 SV=1	CSN8_RAT	Cops8	0.711	0.711	0.496	0.956	0.956	0.711	0.711	0.496
Mammalian ependymin-related protein 1 OS=Rattus norvegicus OX=10116 GN=Epdr1 PE=2 SV=1	EPDR1_RAT	Epdr1	0.839	1.35	0.839	0.839	1.08	0.839	1.08	1.08
Low molecular weight phosphotyrosine protein phosphatase OS=Rattus norvegicus OX=10116 GN=Acp1 PE=1 SV=3	PPAC_RAT	Acp1	0.976	0.976	0.976	0.667	0.667	1.78	1.34	1.34
Eukaryotic translation initiation factor 4E OS=Rattus norvegicus OX=10116 GN=Eif4e PE=1 SV=1	IF4E_RAT	Eif4e	0.453	0.453	0.283	0.453	0	0.283	0.645	0.645
Sterol O-acyltransferase 1 OS=Rattus norvegicus OX=10116 GN=Soat1 PE=2 SV=1	SOAT1_RAT	Soat1	0.161	0.161	0.161	0	0.105	0.105	0.105	0.105
NADH dehydrogenase [ubiquinone] 1 alpha subcomplex subunit 5 OS=Rattus norvegicus OX=10116 GN=Ndufa5 PE=1 SV=3	NDUA5_RAT	Ndufa5	1.47	0.57	0.57	0	1.47	0.968	1.47	0.57
Serine/arginine-rich splicing factor 5 OS=Rattus norvegicus OX=10116 GN=Srsf5 PE=1 SV=1	SRSF5_RAT	Srsf5	0	0.503	0.357	0.357	0	0.357	0.357	0.664
Glutathione synthetase OS=Rattus norvegicus OX=10116 GN=Gss PE=1 SV=1	GSHB_RAT	Gss	0.275	0	0.355	0	0.2	0.2	0.129	0
D-dopachrome decarboxylase OS=Rattus norvegicus OX=10116 GN=Ddt PE=1 SV=3	DOPD_RAT	Ddt	1.52	1	1.52	0.587	1.52	1.52	0	2.17
WD repeat-containing protein 61 OS=Rattus norvegicus OX=10116 GN=Wdr61 PE=1 SV=1	WDR61_RAT	Wdr61	0.323	0.595	0.205	0.595	0	0.453	0.595	0.323
Beta-soluble NSF attachment protein OS=Rattus norvegicus OX=10116 GN=Napb PE=1 SV=1	SNAB_RAT	Napb	0.935	0	0.458	0.458	0	0.458	0.761	0.761
Eukaryotic translation initiation factor 3 subunit J OS=Rattus norvegicus OX=10116 GN=Eif3j PE=1 SV=1	EIF3J_RAT	Eif3j	0.537	0.381	0	0.381	0.24	0.537	0.381	0
2',3'-cyclic-nucleotide 3'-phosphodiesterase OS=Rattus norvegicus OX=10116 GN=Cnp PE=1 SV=2	CN37_RAT	Cnp	0	0.144	0.223	0.144	0.144	0.144	0.144	0
Trans-Golgi network integral membrane protein TGN38 OS=Rattus norvegicus OX=10116 GN=Ttgn1 PE=1 SV=1	TGON3_RAT	Ttgn1	0	0	0.179	0	0	0	0.179	0
Dual specificity mitogen-activated protein kinase kinase 2 OS=Rattus norvegicus OX=10116 GN=Map2k2 PE=1 SV=1	MP2K2_RAT	Map2k2	0	0.332	0	0	0	0.332	0	0.332
BRO1 domain-containing protein BROX OS=Rattus norvegicus OX=10116 GN=Brox PE=2 SV=1	BROX_RAT	Brox	0	0	0.229	0.41	0.229	0	0.147	0
Fatty acyl-CoA reductase 1 OS=Rattus norvegicus OX=10116 GN=Far1 PE=2 SV=1	FACR1_RAT	Far1	0	0	0.114	0	0.114	0	0	0
Ribosome-releasing factor 2, mitochondrial OS=Rattus norvegicus OX=10116 GN=Gfm2 PE=2 SV=2	RRF2M_RAT	Gfm2	0.118	0	0	0.0774	0	0	0	0
Inositol polyphosphate 5-phosphatase OCRL-1 OS=Rattus norvegicus OX=10116 GN=Ocrl PE=1 SV=1	OCRL_RAT	Ocrl	0	0	0	0	0.166	0.0634	0	0
Secretogranin-3 OS=Rattus norvegicus OX=10116 GN=Scg3 PE=1 SV=1	SCG3_RAT	Scg3	0	0	0	0	0.197	0	0	0.127
ATP synthase subunit e, mitochondrial OS=Rattus norvegicus OX=10116 GN=Atp5me PE=1 SV=3	ATP5I_RAT	Atp5me	3.13	1.9	3.13	3.13	1.9	3.13	4.89	3.13
RNA-binding protein Musashi homolog 1 OS=Rattus norvegicus OX=10116 GN=Msi1 PE=2 SV=1	MSI1H_RAT	Msi1	0.382	0.275	0.275	0.625	0.176	0.176	0.275	0.176
Mid1-interacting protein 1 OS=Rattus norvegicus OX=10116 GN=Mid1ip1 PE=1 SV=1	M1IP1_RAT	Mid1ip1	0.576	0.354	0.834	0.354	0.354	0	0.354	0.354
Scavenger receptor class B member 1 OS=Rattus norvegicus OX=10116 GN=Scarb1 PE=1 SV=1	SCRB1_RAT	Scarb1	0	0.118	0.118	0.183	0.183	0.118	0	0.118
5'-AMP-activated protein kinase subunit gamma-1 OS=Rattus norvegicus OX=10116 GN=Prkag1 PE=1 SV=3	AAKG1_RAT	Prkag1	0.288	0.288	0.288	0.525	0.402	0.288	0	0
Cyclin-dependent kinase 9 OS=Rattus norvegicus OX=10116 GN=Cdk9 PE=2 SV=1	CDK9_RAT	Cdk9	0.249	0.345	0	0.345	0	0	0.345	0
Porphobilinogen deaminase OS=Rattus norvegicus OX=10116 GN=Hmbs PE=1 SV=2	HEM3_RAT	Hmbs	0	0.273	0.273	0.273	0.175	0.175	0.273	0
Actin-related protein 2/3 complex subunit 1A OS=Rattus norvegicus OX=10116 GN=Arpc1a PE=2 SV=1	ARC1A_RAT	Arpc1a	0	0	0.164	0	0.256	0	0	0
Keratin, type I cytoskeletal 14 OS=Rattus norvegicus OX=10116 GN=Krt14 PE=2 SV=1	K1C14_RAT	Krt14	0.437	0	0.274	0	0.353	0	0	0
Septin-8 OS=Rattus norvegicus OX=10116 GN=Sept8 PE=1 SV=1	SEPT8_RAT	2008-09-01	0	0.282	0	0.282	0	0	0.205	0
Mortality factor 4-like protein 1 OS=Rattus norvegicus OX=10116 GN=Morf4l1 PE=2 SV=1	MO4L1_RAT	Morf4l1	0	0.405	0	0.405	0	0.185	0	0
Potassium voltage-gated channel subfamily H member 1 OS=Rattus norvegicus OX=10116 GN=Kcnh1 PE=1 SV=1	KCNH1_RAT	Kcnh1	0	0	0	0	0	0	0.0611	0
THO complex subunit 6 homolog OS=Rattus norvegicus OX=10116 GN=Thoc6 PE=2 SV=1	THOC6_RAT	Thoc6	0.525	0.806	0.525	0.525	0.806	0.402	0.525	0.402
Translocon-associated protein subunit alpha OS=Rattus norvegicus OX=10116 GN=Ssr1 PE=1 SV=1	SSRA_RAT	Ssr1	0.425	0.425	0.425	0.425	0.425	0.425	0.425	0.425
Fructose-bisphosphate aldolase C OS=Rattus norvegicus OX=10116 GN=Aldoc PE=1 SV=3	ALDOC_RAT	Aldoc	0.175	0.38	0.175	0.273	0.38	0.38	0.175	0.38
Serine/threonine-protein phosphatase PP1-beta catalytic subunit OS=Rattus norvegicus OX=10116 GN=Ppp1cb PE=1 SV=3	PP1B_RAT	Ppp1cb	1.15	0.973	1.15	1.34	0	0	1.77	1.34
Neutral cholesterol ester hydrolase 1 OS=Rattus norvegicus OX=10116 GN=Nceh1 PE=1 SV=1	NCEH1_RAT	Nceh1	0	0.231	0	0	0	0.319	0.148	0.413
von Willebrand factor A domain-containing protein 5A OS=Rattus norvegicus OX=10116 GN=Vwa5a PE=2 SV=1	VWA5A_RAT	Vwa5a	0	0.111	0	0.0726	0	0	0	0
Beta-adducin OS=Rattus norvegicus OX=10116 GN=Add2 PE=1 SV=4	ADDB_RAT	Add2	0	0	0	0	0	0.126	0.0826	0
Vacuolar protein sorting-associated protein 33A OS=Rattus norvegicus OX=10116 GN=Vps33a PE=1 SV=1	VP33A_RAT	Vps33a	0	0.0992	0	0	0.267	0	0	0
Oxygen-dependent coproporphyrinogen-III oxidase, mitochondrial OS=Rattus norvegicus OX=10116 GN=Cpox PE=1 SV=1	HEM6_RAT	Cpox	0.213	0.213	0.138	0.138	0.213	0.213	0.213	0.38
AP-3 complex subunit mu-1 OS=Rattus norvegicus OX=10116 GN=Ap3m1 PE=1 SV=1	AP3M1_RAT	Ap3m1	0.31	0.225	0.31	0.225	0.225	0	0.145	0.225
CDK5 regulatory subunit-associated protein 3 OS=Rattus norvegicus OX=10116 GN=Cdk5rap3 PE=1 SV=1	CK5P3_RAT	Cdk5rap3	0	0	0.182	0	0	0	0	0.118
Insulin-like growth factor 1 receptor OS=Rattus norvegicus OX=10116 GN=Igf1r PE=2 SV=2	IGF1R_RAT	Igf1r	0	0	0	0	0	0	0	0.0423
Mitochondrial-processing peptidase subunit alpha OS=Rattus norvegicus OX=10116 GN=Pmpca PE=1 SV=1	MPPA_RAT	Pmpca	0	0.177	0.115	0.177	0.115	0.243	0	0
F-box only protein 30 OS=Rattus norvegicus OX=10116 GN=Fbxo30 PE=1 SV=1	FBX30_RAT	Fbxo30	0.0813	0	0.0813	0	0	0	0	0
Enoyl-CoA delta isomerase 2, mitochondrial OS=Rattus norvegicus OX=10116 GN=Eci2 PE=1 SV=1	ECI2_RAT	Eci2	0	0	0	0.248	0	0	0.159	0
Synaptobrevin homolog YKT6 OS=Rattus norvegicus OX=10116 GN=Ykt6 PE=1 SV=1	YKT6_RAT	Ykt6	1.01	0.321	0.519	0.519	0.746	1.01	0.746	1.01
Inosine-5'-monophosphate dehydrogenase 2 OS=Rattus norvegicus OX=10116 GN=Impdh2 PE=1 SV=1	IMDH2_RAT	Impdh2	0.121	0.256	0	0.121	0.187	0.121	0.121	0.121
Methylcrotonoyl-CoA carboxylase beta chain, mitochondrial OS=Rattus norvegicus OX=10116 GN=Mccc2 PE=2 SV=1	MCCB_RAT	Mccc2	0	0	0.168	0	0.109	0.365	0.23	0
Survival of motor neuron-related-splicing factor 30 OS=Rattus norvegicus OX=10116 GN=Smndc1 PE=2 SV=1	SPF30_RAT	Smndc1	0	0	0.264	0	0	0	0	0
ER lumen protein-retaining receptor 1 OS=Rattus norvegicus OX=10116 GN=Kdelr1 PE=2 SV=1	ERD21_RAT	Kdelr1	0	0.465	0.663	0.663	0.465	0.465	0.663	0.889
Receptor-type tyrosine-protein phosphatase-like N OS=Rattus norvegicus OX=10116 GN=Ptprn PE=1 SV=2	PTPRN_RAT	Ptprn	0	0	0	0	0.129	0	0.0623	0.0623
Translation initiation factor eIF-2B subunit epsilon OS=Rattus norvegicus OX=10116 GN=Eif2b5 PE=1 SV=2	EI2BE_RAT	Eif2b5	0.127	0	0	0	0.0831	0.0831	0.0831	0.127
Membrane-associated progesterone receptor component 2 OS=Rattus norvegicus OX=10116 GN=Pgrmc2 PE=1 SV=1	PGRC2_RAT	Pgrmc2	0.944	0.49	0.944	0.702	0.944	0.49	0.702	0.702
Protein RER1 OS=Rattus norvegicus OX=10116 GN=Rer1 PE=1 SV=1	RER1_RAT	Rer1	0.501	0.311	0.501	0.501	0.311	0.501	0.501	0.501
2-oxoisovalerate dehydrogenase subunit beta, mitochondrial OS=Rattus norvegicus OX=10116 GN=Bckdhb PE=1 SV=3	ODBB_RAT	Bckdhb	0.159	0.344	0.248	0.159	0.159	0.159	0.248	0.159
Protein IMPACT OS=Rattus norvegicus OX=10116 GN=Impact PE=1 SV=1	IMPCT_RAT	Impact	0.192	0.192	0	0.192	0	0	0.192	0
60S ribosomal protein L35 OS=Rattus norvegicus OX=10116 GN=Rpl35 PE=1 SV=3	RL35_RAT	Rpl35	0.875	0.52	0	0	0	0	0.875	1.31
Choline-phosphate cytidylyltransferase A OS=Rattus norvegicus OX=10116 GN=Pcyt1a PE=1 SV=2	PCY1A_RAT	Pcyt1a	0	0.164	0	0.164	0	0.164	0	0
Glutathione S-transferase kappa 1 OS=Rattus norvegicus OX=10116 GN=Gstk1 PE=1 SV=3	GSTK1_RAT	Gstk1	0.277	0	0.277	0.277	0.444	0	0.277	0.444
Lanosterol synthase OS=Rattus norvegicus OX=10116 GN=Lss PE=1 SV=2	ERG7_RAT	Lss	0	0.0799	0.122	0.0799	0.122	0.0799	0.166	0.0799
Casein kinase II subunit beta OS=Rattus norvegicus OX=10116 GN=Csnk2b PE=1 SV=1	CSK2B_RAT	Csnk2b	0.455	0	0.284	0	0	0	0	0.284
Emerin OS=Rattus norvegicus OX=10116 GN=Emd PE=1 SV=1	EMD_RAT	Emd	0.374	0.698	0.528	0.698	0	0	0.888	0.528
Splicing factor, arginine/serine-rich 15 (Fragment) OS=Rattus norvegicus OX=10116 GN=Scaf4 PE=1 SV=1	SFR15_RAT	Scaf4	0	0	0.0581	0.0884	0	0	0	0
tRNA methyltransferase 10 homolog C OS=Rattus norvegicus OX=10116 GN=Trmt10c PE=2 SV=1	TM10C_RAT	Trmt10c	0	0	0	0.141	0	0	0	0
Neural Wiskott-Aldrich syndrome protein OS=Rattus norvegicus OX=10116 GN=Wasl PE=1 SV=2	WASL_RAT	Wasl	0	0.124	0	0.124	0	0.124	0	0.192
Inter-alpha-trypsin inhibitor heavy chain H3 OS=Rattus norvegicus OX=10116 GN=Itih3 PE=2 SV=1	ITIH3_RAT	Itih3	0.0669	0	0	0	0	0	0	0
NAD(P)H-hydrate epimerase OS=Rattus norvegicus OX=10116 GN=Naxe PE=2 SV=1	NNRE_RAT	Naxe	0.226	0.226	0.226	0.226	0.226	0.357	0.664	0.357
26S proteasome non-ATPase regulatory subunit 9 OS=Rattus norvegicus OX=10116 GN=Psmd9 PE=1 SV=1	PSMD9_RAT	Psmd9	0.285	0.285	0.285	0.285	0	0.457	0.457	0.285
GTP:AMP phosphotransferase AK3, mitochondrial OS=Rattus norvegicus OX=10116 GN=Ak3 PE=2 SV=2	KAD3_RAT	Ak3	0.279	0.446	0	0.635	0.446	0	0.446	0
Sideroflexin-3 OS=Rattus norvegicus OX=10116 GN=Sfxn3 PE=2 SV=1	SFXN3_RAT	Sfxn3	0.306	0.195	0.306	0.428	0	0.306	0.306	0.195
Endophilin-A2 OS=Rattus norvegicus OX=10116 GN=Sh3gl1 PE=1 SV=1	SH3G1_RAT	Sh3gl1	0	0.165	0.165	0.257	0	0.165	0.257	0.257
Basal cell adhesion molecule OS=Rattus norvegicus OX=10116 GN=Bcam PE=2 SV=1	BCAM_RAT	Bcam	0	0.152	0	0.0992	0.152	0.0992	0	0
CUGBP Elav-like family member 1 OS=Rattus norvegicus OX=10116 GN=Celf1 PE=2 SV=1	CELF1_RAT	Celf1	0.276	0	0	0.13	0	0.13	0.13	0
Kinesin-like protein KIF2B OS=Rattus norvegicus OX=10116 GN=Kif2b PE=2 SV=2	KIF2B_RAT	Kif2b	0	0	0	0	0	0.0891	0	0
Lanosterol 14-alpha demethylase OS=Rattus norvegicus OX=10116 GN=Cyp51a1 PE=1 SV=1	CP51A_RAT	Cyp51a1	0.119	0.119	0.252	0.183	0.183	0.252	0	0
Eukaryotic translation initiation factor 1A OS=Rattus norvegicus OX=10116 GN=Eif1a PE=2 SV=3	IF1A_RAT	Eif1a	0.449	0.744	0	0.449	1.1	0.744	0.449	1.1
Ras-related C3 botulinum toxin substrate 1 OS=Rattus norvegicus OX=10116 GN=Rac1 PE=1 SV=1	RAC1_RAT	Rac1	0.544	0.336	0	0.336	0.336	0.336	0.544	0.336
AP-2 complex subunit sigma OS=Rattus norvegicus OX=10116 GN=Ap2s1 PE=1 SV=1	AP2S1_RAT	Ap2s1	0.436	0.436	0	0.436	0.436	0	0.436	0
Swi5-dependent recombination DNA repair protein 1 homolog OS=Rattus norvegicus OX=10116 GN=Sfr1 PE=2 SV=1	SFR1_RAT	Sfr1	0	0.547	0.244	0.547	0	0.547	0	0.244
tRNA-dihydrouridine(47) synthase [NAD(P)(+)]-like OS=Rattus norvegicus OX=10116 GN=Dus3l PE=2 SV=1	DUS3L_RAT	Dus3l	0	0.0935	0	0	0	0	0	0
Fatty acid desaturase 1 OS=Rattus norvegicus OX=10116 GN=Fads1 PE=2 SV=1	FADS1_RAT	Fads1	0.129	0.199	0	0.354	0.129	0	0.129	0
Collectin-12 OS=Rattus norvegicus OX=10116 GN=Colec12 PE=2 SV=1	COL12_RAT	Colec12	0	0	0.0817	0	0	0	0	0
Tumor susceptibility gene 101 protein OS=Rattus norvegicus OX=10116 GN=Tsg101 PE=1 SV=1	TS101_RAT	Tsg101	0	0	0	0.155	0	0.155	0	0
Spindlin-1 OS=Rattus norvegicus OX=10116 GN=Spin1 PE=2 SV=1	SPIN1_RAT	Spin1	0	0.236	0	0	0	0	0	0
RNA polymerase II-associated protein 3 OS=Rattus norvegicus OX=10116 GN=Rpap3 PE=1 SV=1	RPAP3_RAT	Rpap3	0.137	0	0	0	0	0	0	0
Transmembrane protein 43 OS=Rattus norvegicus OX=10116 GN=Tmem43 PE=2 SV=1	TMM43_RAT	Tmem43	0.328	0.237	0.152	0.152	0.237	0.237	0.328	0.328
40S ribosomal protein S21 OS=Rattus norvegicus OX=10116 GN=Rps21 PE=1 SV=1	RS21_RAT	Rps21	4.03	2.64	2.64	1.64	1.64	2.64	1.64	1.64
Sorting nexin-27 OS=Rattus norvegicus OX=10116 GN=Snx27 PE=1 SV=2	SNX27_RAT	Snx27	0	0	0.11	0.11	0.11	0.11	0	0.11
Adapter molecule crk OS=Rattus norvegicus OX=10116 GN=Crk PE=1 SV=1	CRK_RAT	Crk	0.205	0.205	0	0.322	0.205	0.451	0	0.205
Fatty acid desaturase 2 OS=Rattus norvegicus OX=10116 GN=Fads2 PE=2 SV=1	FADS2_RAT	Fads2	0.129	0.129	0.129	0.129	0.129	0	0.129	0.129
RNA-binding protein with serine-rich domain 1 OS=Rattus norvegicus OX=10116 GN=Rnps1 PE=2 SV=1	RNPS1_RAT	Rnps1	0	0	0	0.202	0	0	0	0
Sorting nexin-1 OS=Rattus norvegicus OX=10116 GN=Snx1 PE=1 SV=1	SNX1_RAT	Snx1	0	0	0.114	0.114	0.176	0	0	0.114
Hydroxymethylglutaryl-CoA synthase, cytoplasmic OS=Rattus norvegicus OX=10116 GN=Hmgcs1 PE=1 SV=1	HMCS1_RAT	Hmgcs1	0.117	0.249	0.181	0.249	0	0.249	0	0
Xaa-Pro dipeptidase OS=Rattus norvegicus OX=10116 GN=Pepd PE=2 SV=1	PEPD_RAT	Pepd	0.123	0.262	0	0.337	0	0.123	0.262	0.191
CTP synthase 2 OS=Rattus norvegicus OX=10116 GN=Ctps2 PE=1 SV=1	PYRG2_RAT	Ctps2	0.102	0	0.102	0	0.102	0.102	0	0
39S ribosomal protein L22, mitochondrial OS=Rattus norvegicus OX=10116 GN=Mrpl22 PE=1 SV=1	RM22_RAT	Mrpl22	0.297	0	0	0	0.297	0.297	0	0
Mesencephalic astrocyte-derived neurotrophic factor OS=Rattus norvegicus OX=10116 GN=Manf PE=1 SV=1	MANF_RAT	Manf	0.834	0	0	0	0.354	0.576	0.354	0.354
Gamma-glutamyl hydrolase OS=Rattus norvegicus OX=10116 GN=Ggh PE=1 SV=1	GGH_RAT	Ggh	0	0.302	0	0	0	0	0.192	0.192
Cyclin-dependent kinase 18 OS=Rattus norvegicus OX=10116 GN=Cdk18 PE=1 SV=1	CKD18_RAT	Cdk18	0	0	0.359	0	0.202	0.278	0	0
La-related protein 7 OS=Rattus norvegicus OX=10116 GN=Larp7 PE=1 SV=2	LARP7_RAT	Larp7	0	0	0.103	0.103	0	0.159	0	0
Adipocyte plasma membrane-associated protein OS=Rattus norvegicus OX=10116 GN=Apmap PE=2 SV=2	APMAP_RAT	Apmap	0	0.162	0	0.162	0	0	0.253	0.253
ER membrane protein complex subunit 8 OS=Rattus norvegicus OX=10116 GN=Emc8 PE=2 SV=1	EMC8_RAT	Emc8	0.944	0.702	0.944	0.49	0.49	0.944	0.49	0.702
Cold-inducible RNA-binding protein OS=Rattus norvegicus OX=10116 GN=Cirbp PE=2 SV=1	CIRBP_RAT	Cirbp	0.938	0.938	0.938	0.392	1.29	0.938	1.29	0.938
Haloacid dehalogenase-like hydrolase domain-containing protein 2 OS=Rattus norvegicus OX=10116 GN=Hdhd2 PE=2 SV=1	HDHD2_RAT	Hdhd2	0.244	0.387	0.387	0.387	0.387	0	0.547	0.387
Actin-related protein 2/3 complex subunit 5 OS=Rattus norvegicus OX=10116 GN=Arpc5 PE=1 SV=3	ARPC5_RAT	Arpc5	0.757	0.456	0	0	0.456	0	0.757	0.456
GTP cyclohydrolase 1 OS=Rattus norvegicus OX=10116 GN=Gch1 PE=1 SV=1	GCH1_RAT	Gch1	0.414	0.26	0	0.26	0	0.26	0.26	0
mRNA export factor OS=Rattus norvegicus OX=10116 GN=Rae1 PE=1 SV=1	RAE1L_RAT	Rae1	0	0.262	0	0.168	0	0	0	0
FACT complex subunit SSRP1 OS=Rattus norvegicus OX=10116 GN=Ssrp1 PE=1 SV=2	SSRP1_RAT	Ssrp1	0	0	0	0	0.0823	0	0	0
Coiled-coil domain-containing protein 91 OS=Rattus norvegicus OX=10116 GN=Ccdc91 PE=1 SV=1	CCD91_RAT	Ccdc91	0	0	0	0.135	0	0	0	0
Mediator of RNA polymerase II transcription subunit 24 OS=Rattus norvegicus OX=10116 GN=Med24 PE=1 SV=1	MED24_RAT	Med24	0	0.0601	0	0	0	0	0	0
Argininosuccinate lyase OS=Rattus norvegicus OX=10116 GN=Asl PE=2 SV=1	ARLY_RAT	Asl	0	0	0	0	0.131	0.203	0	0
Nuclear pore glycoprotein p62 OS=Rattus norvegicus OX=10116 GN=Nup62 PE=1 SV=1	NUP62_RAT	Nup62	0.127	0.269	0.127	0.196	0.196	0.269	0.196	0.127
Barrier-to-autointegration factor OS=Rattus norvegicus OX=10116 GN=Banf1 PE=1 SV=1	BAF_RAT	Banf1	0	1.44	1.44	0	1.44	0	0	0
Translation initiation factor eIF-2B subunit gamma OS=Rattus norvegicus OX=10116 GN=Eif2b3 PE=2 SV=2	EI2BG_RAT	Eif2b3	0	0	0	0	0.134	0	0	0
Integrator complex subunit 14 OS=Rattus norvegicus OX=10116 GN=Ints14 PE=2 SV=1	INT14_RAT	Ints14	0	0.118	0.118	0.118	0	0.118	0.118	0.118
Torsin-1A-interacting protein 1 OS=Rattus norvegicus OX=10116 GN=Tor1aip1 PE=1 SV=1	TOIP1_RAT	Tor1aip1	0	0.102	0.102	0.102	0.102	0	0	0.102
Protein unc-13 homolog D OS=Rattus norvegicus OX=10116 GN=Unc13d PE=1 SV=1	UN13D_RAT	Unc13d	0	0	0.0534	0	0	0	0	0
Visinin-like protein 1 OS=Rattus norvegicus OX=10116 GN=Vsnl1 PE=1 SV=2	VISL1_RAT	Vsnl1	0	0	0	0	0.325	0	0	0
Glycogenin-1 OS=Rattus norvegicus OX=10116 GN=Gyg1 PE=2 SV=4	GLYG_RAT	Gyg1	0.66	0	0.525	0	0.402	0	0.402	0.288
Calcium uptake protein 1, mitochondrial OS=Rattus norvegicus OX=10116 GN=Micu1 PE=2 SV=1	MICU1_RAT	Micu1	0	0	0	0.125	0	0	0	0
Coiled-coil domain-containing protein 8 OS=Rattus norvegicus OX=10116 GN=Ccdc8 PE=1 SV=1	CCDC8_RAT	Ccdc8	0	0.0961	0	0	0.0961	0	0	0
Speckle targeted PIP5K1A-regulated poly(A) polymerase OS=Rattus norvegicus OX=10116 GN=Tut1 PE=1 SV=1	STPAP_RAT	Tut1	0	0.0703	0	0.107	0	0	0.0703	0
DNA-binding protein SMUBP-2 OS=Rattus norvegicus OX=10116 GN=Ighmbp2 PE=1 SV=1	SMBP2_RAT	Ighmbp2	0	0	0	0	0	0.061	0	0
Cation-dependent mannose-6-phosphate receptor OS=Rattus norvegicus OX=10116 GN=M6pr PE=1 SV=1	MPRD_RAT	M6pr	0.355	0.355	0.499	0.355	0.355	0.355	0.355	0.355
Ubiquitin-like protein 4A OS=Rattus norvegicus OX=10116 GN=Ubl4a PE=2 SV=1	UBL4A_RAT	Ubl4a	1	0.682	0.414	0.682	0.414	1	0.682	1
Guanine nucleotide-binding protein G(z) subunit alpha OS=Rattus norvegicus OX=10116 GN=Gnaz PE=2 SV=3	GNAZ_RAT	Gnaz	0.262	0.592	0.262	0.262	0.363	0.262	0.592	0.262
FAS-associated factor 1 OS=Rattus norvegicus OX=10116 GN=Faf1 PE=1 SV=1	FAF1_RAT	Faf1	0.0906	0	0.0906	0	0.139	0	0	0
TIP41-like protein OS=Rattus norvegicus OX=10116 GN=Tiprl PE=1 SV=1	TIPRL_RAT	Tiprl	0	0.223	0	0.223	0	0.223	0	0
Protein kinase C and casein kinase substrate in neurons protein 1 OS=Rattus norvegicus OX=10116 GN=Pacsin1 PE=1 SV=1	PACN1_RAT	Pacsin1	0	0.134	0	0.134	0	0	0	0
Syntaxin-12 OS=Rattus norvegicus OX=10116 GN=Stx12 PE=1 SV=1	STX12_RAT	Stx12	0	0.223	0	0.223	0.353	0	0	0
Protein O-glucosyltransferase 1 OS=Rattus norvegicus OX=10116 GN=Poglut1 PE=3 SV=1	PGLT1_RAT	Poglut1	0	0.146	0	0	0	0	0	0
Glycogen synthase kinase-3 beta OS=Rattus norvegicus OX=10116 GN=Gsk3b PE=1 SV=1	GSK3B_RAT	Gsk3b	0	0.226	0	0.312	0	0.145	0.226	0.145
Phytanoyl-CoA hydroxylase-interacting protein-like OS=Rattus norvegicus OX=10116 GN=Phyhipl PE=1 SV=2	PHIPL_RAT	Phyhipl	0	0.251	0.251	0	0	0	0	0
TRMT1-like protein OS=Rattus norvegicus OX=10116 GN=Trmt1l PE=2 SV=1	TRM1L_RAT	Trmt1l	0.127	0	0	0	0	0	0	0
Vesicle-associated membrane protein 3 OS=Rattus norvegicus OX=10116 GN=Vamp3 PE=1 SV=1	VAMP3_RAT	Vamp3	1.2	1.2	1.85	0.689	1.2	1.2	1.2	0.689
Dynein light chain Tctex-type 1 OS=Rattus norvegicus OX=10116 GN=Dynlt1 PE=1 SV=1	DYLT1_RAT	Dynlt1	2.36	0.624	1.07	1.07	1.64	0.624	1.07	0.624
Transmembrane protein 109 OS=Rattus norvegicus OX=10116 GN=Tmem109 PE=2 SV=1	TM109_RAT	Tmem109	0.431	0.27	0.431	0	0.27	0.27	0.431	0.27
WD repeat-containing protein 5 OS=Rattus norvegicus OX=10116 GN=Wdr5 PE=1 SV=1	WDR5_RAT	Wdr5	0.296	0.189	0	0.296	0.189	0.189	0.189	0
2',5'-phosphodiesterase 12 OS=Rattus norvegicus OX=10116 GN=Pde12 PE=2 SV=1	PDE12_RAT	Pde12	0	0.153	0.0997	0.0997	0	0.0997	0	0.0997
Ubiquitin carboxyl-terminal hydrolase isozyme L3 OS=Rattus norvegicus OX=10116 GN=Uchl3 PE=1 SV=1	UCHL3_RAT	Uchl3	0.821	0	0	0.433	0	0.433	0.433	0
Protein DPCD OS=Rattus norvegicus OX=10116 GN=Dpcd PE=2 SV=2	DPCD_RAT	Dpcd	0.31	0	0	0	0.31	0	0.499	0
Carnitine O-palmitoyltransferase 1, liver isoform OS=Rattus norvegicus OX=10116 GN=Cpt1a PE=1 SV=2	CPT1A_RAT	Cpt1a	0	0.0755	0	0.115	0	0	0	0
Probable G-protein coupled receptor 158 OS=Rattus norvegicus OX=10116 GN=Gpr158 PE=1 SV=1	GP158_RAT	Gpr158	0	0	0	0	0	0	0	0.049
Charged multivesicular body protein 5 OS=Rattus norvegicus OX=10116 GN=Chmp5 PE=2 SV=1	CHMP5_RAT	Chmp5	0.663	0	0	0.29	0	0	0.29	0
ADP-ribosylation factor-like protein 2 OS=Rattus norvegicus OX=10116 GN=Arl2 PE=1 SV=1	ARL2_RAT	Arl2	0.562	0.812	0.346	0.562	0.562	0.346	0.562	0.562
Basigin OS=Rattus norvegicus OX=10116 GN=Bsg PE=1 SV=2	BASI_RAT	Bsg	0	0.251	0.161	0.161	0.161	0.251	0.161	0.161
Receptor expression-enhancing protein 5 OS=Rattus norvegicus OX=10116 GN=Reep5 PE=1 SV=1	REEP5_RAT	Reep5	0	0	0	0	0	0.544	0	0.544
Phosphoribosyl pyrophosphate synthase-associated protein 1 OS=Rattus norvegicus OX=10116 GN=Prpsap1 PE=1 SV=1	KPRA_RAT	Prpsap1	0.619	0.379	0	0.272	0.174	0.174	0.494	0.272
Importin subunit alpha-5 OS=Rattus norvegicus OX=10116 GN=Kpna1 PE=1 SV=1	IMA5_RAT	Kpna1	0	0	0	0.112	0	0	0	0
Proteasome subunit beta type-10 OS=Rattus norvegicus OX=10116 GN=Psmb10 PE=2 SV=1	PSB10_RAT	Psmb10	0	0	0.542	0	0.384	0	0.384	0.242
Calumenin OS=Rattus norvegicus OX=10116 GN=Calu PE=1 SV=1	CALU_RAT	Calu	0	0.407	0.292	0.186	0.186	0.186	0.292	0
Mini-chromosome maintenance complex-binding protein OS=Rattus norvegicus OX=10116 GN=Mcmbp PE=2 SV=1	MCMBP_RAT	Mcmbp	0	0.0916	0	0	0.0916	0	0	0
Thioredoxin reductase-like selenoprotein T OS=Rattus norvegicus OX=10116 GN=Selenot PE=1 SV=2	SELT_RAT	Selenot	0.519	0	0.321	0.321	0.746	0.321	0.321	0.321
Isoamyl acetate-hydrolyzing esterase 1 homolog OS=Rattus norvegicus OX=10116 GN=Iah1 PE=2 SV=2	IAH1_RAT	Iah1	0.251	0.399	0	0.251	0	0	0.251	0.251
Sterol-4-alpha-carboxylate 3-dehydrogenase, decarboxylating OS=Rattus norvegicus OX=10116 GN=Nsdhl PE=2 SV=1	NSDHL_RAT	Nsdhl	0	0	0.17	0.17	0	0.17	0	0.265
Trimethyllysine dioxygenase, mitochondrial OS=Rattus norvegicus OX=10116 GN=Tmlhe PE=1 SV=2	TMLH_RAT	Tmlhe	0	0	0	0.137	0	0	0.137	0.212
Cadherin-2 OS=Rattus norvegicus OX=10116 GN=Cdh2 PE=1 SV=1	CADH2_RAT	Cdh2	0	0.101	0	0.101	0	0	0	0
N-myc proto-oncogene protein OS=Rattus norvegicus OX=10116 GN=Mycn PE=3 SV=1	MYCN_RAT	Mycn	0.137	0	0	0	0	0.137	0.137	0.137
39S ribosomal protein L46, mitochondrial OS=Rattus norvegicus OX=10116 GN=Mrpl46 PE=2 SV=1	RM46_RAT	Mrpl46	0.348	0	0	0	0	0	0	0
All-trans-retinol 13,14-reductase OS=Rattus norvegicus OX=10116 GN=Retsat PE=2 SV=1	RETST_RAT	Retsat	0.152	0.0992	0	0.0992	0.0992	0	0	0
Phosphatidylinositol 4-kinase type 2-alpha OS=Rattus norvegicus OX=10116 GN=Pi4k2a PE=1 SV=1	P4K2A_RAT	Pi4k2a	0	0	0.124	0	0	0.192	0.124	0.124
Exopolyphosphatase PRUNE1 OS=Rattus norvegicus OX=10116 GN=Prune1 PE=1 SV=1	PRUN1_RAT	Prune1	0	0	0	0	0	0	0	0.21
Paraspeckle component 1 OS=Rattus norvegicus OX=10116 GN=Pspc1 PE=1 SV=1	PSPC1_RAT	Pspc1	0	0	0	0	0.115	0	0	0
Adenylate cyclase type 10 OS=Rattus norvegicus OX=10116 GN=Adcy10 PE=1 SV=1	ADCYA_RAT	Adcy10	0	0	0	0	0	0.0353	0	0
KIF1-binding protein OS=Rattus norvegicus OX=10116 GN=Kbp PE=2 SV=1	KBP_RAT	Kbp	0	0	0	0	0.144	0	0	0
Dr1-associated corepressor OS=Rattus norvegicus OX=10116 GN=Drap1 PE=2 SV=1	NC2A_RAT	Drap1	0.519	0.746	0.321	0.519	0.519	0	0.519	0.519
Methyltransferase-like 26 OS=Rattus norvegicus OX=10116 GN=Mettl26 PE=2 SV=2	MTL26_RAT	Mettl26	0.988	0.316	0	0.51	0.51	0	0.732	0.732
Pre-mRNA 3'-end-processing factor FIP1 OS=Rattus norvegicus OX=10116 GN=Fip1l1 PE=1 SV=1	FIP1_RAT	Fip1l1	0	0.303	0.112	0.236	0.112	0	0.236	0.112
ATP-sensitive inward rectifier potassium channel 11 OS=Rattus norvegicus OX=10116 GN=Kcnj11 PE=1 SV=1	KCJ11_RAT	Kcnj11	0	0	0	0	0	0	0.244	0
40S ribosomal protein S29 OS=Rattus norvegicus OX=10116 GN=Rps29 PE=1 SV=2	RS29_RAT	Rps29	2.61	2.61	1.35	2.61	1.35	0	2.61	0
GTPase KRas OS=Rattus norvegicus OX=10116 GN=Kras PE=1 SV=3	RASK_RAT	Kras	0.538	0	0.332	0	0.332	0	0	0.538
Large neutral amino acids transporter small subunit 1 OS=Rattus norvegicus OX=10116 GN=Slc7a5 PE=1 SV=2	LAT1_RAT	Slc7a5	0	0.121	0.121	0.121	0.121	0.121	0.121	0.121
UPF0160 protein MYG1, mitochondrial OS=Rattus norvegicus OX=10116 GN=Myg1 PE=1 SV=1	MYG1_RAT	Myg1	0.159	0.447	0.159	0.447	0	0.248	0.344	0.344
Protein phosphatase 1F OS=Rattus norvegicus OX=10116 GN=Ppm1f PE=2 SV=1	PPM1F_RAT	Ppm1f	0	0.138	0.214	0	0.381	0.138	0.214	0
Nuclear cap-binding protein subunit 2 OS=Rattus norvegicus OX=10116 GN=Ncbp2 PE=1 SV=1	NCBP2_RAT	Ncbp2	0	0.409	0	0	0	0	0.409	0
Epsin-3 OS=Rattus norvegicus OX=10116 GN=Epn3 PE=1 SV=1	EPN3_RAT	Epn3	0.103	0.103	0	0	0	0	0	0
ADP-sugar pyrophosphatase OS=Rattus norvegicus OX=10116 GN=Nudt5 PE=2 SV=1	NUDT5_RAT	Nudt5	0.296	0.678	0.475	0.678	0	0.296	0.475	0.475
Dual specificity testis-specific protein kinase 2 OS=Rattus norvegicus OX=10116 GN=Tesk2 PE=2 SV=1	TESK2_RAT	Tesk2	0	0.106	0	0	0	0	0	0
Gephyrin OS=Rattus norvegicus OX=10116 GN=Gphn PE=1 SV=3	GEPH_RAT	Gphn	0.0799	0.0799	0.0799	0.0799	0	0	0	0
Ribosome maturation protein SBDS OS=Rattus norvegicus OX=10116 GN=Sbds PE=2 SV=1	SBDS_RAT	Sbds	0	0	0.387	0	0.387	0	0	0
Ribosome-recycling factor, mitochondrial OS=Rattus norvegicus OX=10116 GN=Mrrf PE=2 SV=1	RRFM_RAT	Mrrf	0	0	0	0	0.241	0	0	0
Probable tRNA N6-adenosine threonylcarbamoyltransferase OS=Rattus norvegicus OX=10116 GN=Osgep PE=2 SV=2	OSGEP_RAT	Osgep	0	0.298	0	0.416	0.298	0	0.298	0
GTP-binding protein REM 2 OS=Rattus norvegicus OX=10116 GN=Rem2 PE=1 SV=2	REM2_RAT	Rem2	0	0.662	0.185	0.289	0	0.289	0.289	0.403
Neuroendocrine protein 7B2 OS=Rattus norvegicus OX=10116 GN=Scg5 PE=1 SV=1	7B2_RAT	Scg5	0	0.302	0.302	0.302	0.485	0.302	0.302	0.302
ER membrane protein complex subunit 3 OS=Rattus norvegicus OX=10116 GN=Emc3 PE=2 SV=3	EMC3_RAT	Emc3	0.233	0.233	0.369	0.369	0.369	0.233	0	0.233
1-phosphatidylinositol 4,5-bisphosphate phosphodiesterase gamma-1 OS=Rattus norvegicus OX=10116 GN=Plcg1 PE=1 SV=1	PLCG1_RAT	Plcg1	0.0443	0	0	0	0	0	0	0
Protein pelota homolog OS=Rattus norvegicus OX=10116 GN=Pelo PE=1 SV=1	PELO_RAT	Pelo	0	0.339	0.157	0	0	0.157	0.157	0
S-formylglutathione hydrolase OS=Rattus norvegicus OX=10116 GN=Esd PE=2 SV=1	ESTD_RAT	Esd	0	0.352	0	0	0	0	0	0
Tubulin alpha-4A chain OS=Rattus norvegicus OX=10116 GN=Tuba4a PE=1 SV=1	TBA4A_RAT	Tuba4a	5.35	6.69	8.31	8.93	8.31	8.93	6.22	6.22
ADP-ribosylation factor 6 OS=Rattus norvegicus OX=10116 GN=Arf6 PE=1 SV=2	ARF6_RAT	Arf6	0.361	0	0.361	0	0	0.361	0	0.361
Deoxyhypusine synthase OS=Rattus norvegicus OX=10116 GN=Dhps PE=2 SV=1	DHYS_RAT	Dhps	0	0	0	0.263	0	0	0.263	0
Toll-interacting protein OS=Rattus norvegicus OX=10116 GN=Tollip PE=1 SV=1	TOLIP_RAT	Tollip	0.514	0.365	0	0.23	0	0.23	0.23	0.23
Delta-1-pyrroline-5-carboxylate dehydrogenase, mitochondrial OS=Rattus norvegicus OX=10116 GN=Aldh4a1 PE=1 SV=1	AL4A1_RAT	Aldh4a1	0	0	0	0.229	0.109	0	0	0
Cytochrome b5 type B OS=Rattus norvegicus OX=10116 GN=Cyb5b PE=1 SV=2	CYB5B_RAT	Cyb5b	0.763	0	0	0	0.46	0	1.13	0.763
Paxillin OS=Rattus norvegicus OX=10116 GN=Pxn PE=1 SV=1	PAXI_RAT	Pxn	0	0	0	0.105	0	0	0	0
Transcobalamin-2 OS=Rattus norvegicus OX=10116 GN=Tcn2 PE=2 SV=1	TCO2_RAT	Tcn2	0	0.143	0	0	0.143	0.223	0.143	0
Neurabin-1 OS=Rattus norvegicus OX=10116 GN=Ppp1r9a PE=1 SV=1	NEB1_RAT	Ppp1r9a	0.0538	0	0	0	0	0	0	0
Nucleotide exchange factor SIL1 OS=Rattus norvegicus OX=10116 GN=Sil1 PE=2 SV=1	SIL1_RAT	Sil1	0	0	0	0	0	0.2	0	0
Peptidyl-prolyl cis-trans isomerase F, mitochondrial OS=Rattus norvegicus OX=10116 GN=Ppif PE=1 SV=2	PPIF_RAT	Ppif	0.33	0	0	0	0	0	0	0.33
60S acidic ribosomal protein P1 OS=Rattus norvegicus OX=10116 GN=Rplp1 PE=3 SV=1	RLA1_RAT	Rplp1	0	0	1.18	1.18	0.682	1.18	0	0
Coronin-1A OS=Rattus norvegicus OX=10116 GN=Coro1a PE=1 SV=3	COR1A_RAT	Coro1a	0	0	0.133	0	0	0.133	0	0
Antigen peptide transporter 2 OS=Rattus norvegicus OX=10116 GN=Tap2 PE=1 SV=1	TAP2_RAT	Tap2	0	0	0	0	0	0.0858	0	0
Phosphotriesterase-related protein OS=Rattus norvegicus OX=10116 GN=Pter PE=2 SV=2	PTER_RAT	Pter	0.176	0.176	0	0	0	0	0.176	0.176
Diphosphomevalonate decarboxylase OS=Rattus norvegicus OX=10116 GN=Mvd PE=1 SV=1	MVD1_RAT	Mvd	0	0.242	0	0.156	0.242	0	0.156	0.242
Glycoprotein-N-acetylgalactosamine 3-beta-galactosyltransferase 1 OS=Rattus norvegicus OX=10116 GN=C1galt1 PE=1 SV=1	C1GLT_RAT	C1galt1	0	0	0	0.162	0	0	0	0
Ras association domain-containing protein 6 OS=Rattus norvegicus OX=10116 GN=Rassf6 PE=2 SV=1	RASF6_RAT	Rassf6	0.173	0	0	0	0	0.173	0	0
Ras GTPase-activating protein 1 OS=Rattus norvegicus OX=10116 GN=Rasa1 PE=3 SV=1	RASA1_RAT	Rasa1	0	0	0	0.0572	0	0.0572	0	0
Meiosis-specific nuclear structural protein 1 OS=Rattus norvegicus OX=10116 GN=Mns1 PE=2 SV=1	MNS1_RAT	Mns1	0	0	0	0	0.11	0	0	0
Cytochrome c oxidase subunit 6A1, mitochondrial OS=Rattus norvegicus OX=10116 GN=Cox6a1 PE=1 SV=2	CX6A1_RAT	Cox6a1	0	0	0	0	0	0	0	1.08
Mortality factor 4-like protein 2 OS=Rattus norvegicus OX=10116 GN=Morf4l2 PE=2 SV=1	MO4L2_RAT	Morf4l2	0.216	0	0.216	0.341	0	0	0.216	0
Glucokinase OS=Rattus norvegicus OX=10116 GN=Gck PE=1 SV=2	HXK4_RAT	Gck	0	0	0	0.13	0.13	0	0	0
Serine/threonine-protein phosphatase PP1-gamma catalytic subunit OS=Rattus norvegicus OX=10116 GN=Ppp1cc PE=1 SV=1	PP1G_RAT	Ppp1cc	0	1.35	0.981	1.35	1.79	1.16	1.79	1.79
NAD-dependent protein deacetylase sirtuin-2 OS=Rattus norvegicus OX=10116 GN=Sirt2 PE=1 SV=1	SIR2_RAT	Sirt2	0	0.175	0	0.175	0	0.273	0.175	0.175
Hepatoma-derived growth factor-related protein 3 OS=Rattus norvegicus OX=10116 GN=Hdgfl3 PE=1 SV=1	HDGR3_RAT	Hdgfl3	0	0.742	0.516	0	0.32	1	0.516	0.516
Protein lin-7 homolog A OS=Rattus norvegicus OX=10116 GN=Lin7a PE=1 SV=2	LIN7A_RAT	Lin7a	0	0.437	0	0.273	0	0.273	0.273	0.622
Splicing factor 3A subunit 2 OS=Rattus norvegicus OX=10116 GN=Sf3a2 PE=2 SV=1	SF3A2_RAT	Sf3a2	0.136	0.136	0	0.136	0.136	0	0.136	0
Serine/threonine-protein kinase 24 OS=Rattus norvegicus OX=10116 GN=Stk24 PE=2 SV=1	STK24_RAT	Stk24	0	0.142	0	0.142	0	0	0.142	0
Monoacylglycerol lipase ABHD12 OS=Rattus norvegicus OX=10116 GN=Abhd12 PE=2 SV=1	ABD12_RAT	Abhd12	0	0.234	0.15	0.234	0.234	0.15	0.234	0.15
Serine/threonine-protein kinase 40 OS=Rattus norvegicus OX=10116 GN=Stk40 PE=2 SV=1	STK40_RAT	Stk40	0	0	0	0	0.139	0	0	0
Sialidase-1 OS=Rattus norvegicus OX=10116 GN=Neu1 PE=1 SV=1	NEUR1_RAT	Neu1	0	0	0	0	0	0.153	0	0.153
Vacuolar-sorting protein SNF8 OS=Rattus norvegicus OX=10116 GN=Snf8 PE=1 SV=1	SNF8_RAT	Snf8	0	0	0	0	0	0.243	0.243	0
Endothelial differentiation-related factor 1 OS=Rattus norvegicus OX=10116 GN=Edf1 PE=1 SV=1	EDF1_RAT	Edf1	0	0	0	0.456	0	0	0.456	0
N-lysine methyltransferase SMYD2 OS=Rattus norvegicus OX=10116 GN=Smyd2 PE=1 SV=1	SMYD2_RAT	Smyd2	0	0	0	0.137	0	0	0	0
AP2-associated protein kinase 1 OS=Rattus norvegicus OX=10116 GN=Aak1 PE=1 SV=1	AAK1_RAT	Aak1	0.0638	0	0	0	0	0	0	0
Serine/threonine-protein kinase A-Raf OS=Rattus norvegicus OX=10116 GN=Araf PE=1 SV=1	ARAF_RAT	Araf	0	0	0.0992	0	0	0	0	0
Retinal dehydrogenase 1 OS=Rattus norvegicus OX=10116 GN=Aldh1a1 PE=1 SV=3	AL1A1_RAT	Aldh1a1	0	0	0	0.124	0	0	0	0
Calpain-1 catalytic subunit OS=Rattus norvegicus OX=10116 GN=Capn1 PE=1 SV=1	CAN1_RAT	Capn1	0.124	0	0	0	0	0	0	0
Immunoglobulin-binding protein 1 OS=Rattus norvegicus OX=10116 GN=Igbp1 PE=2 SV=2	IGBP1_RAT	Igbp1	0	0	0	0	0	0	0.176	0
Plasma alpha-L-fucosidase OS=Rattus norvegicus OX=10116 GN=Fuca2 PE=2 SV=1	FUCO2_RAT	Fuca2	0.127	0.127	0.127	0.127	0.127	0.127	0.197	0.127
40S ribosomal protein S28 OS=Rattus norvegicus OX=10116 GN=Rps28 PE=1 SV=1	RS28_RAT	Rps28	3.36	3.36	1.09	0	3.36	2.02	2.02	2.02
RNA-binding protein 4B OS=Rattus norvegicus OX=10116 GN=Rbm4b PE=2 SV=2	RBM4B_RAT	Rbm4b	0.373	0.268	0	0.268	0	0.172	0.268	0.172
39S ribosomal protein L11, mitochondrial OS=Rattus norvegicus OX=10116 GN=Mrpl11 PE=2 SV=1	RM11_RAT	Mrpl11	0.32	0.32	0.32	0	0.32	0	0	0
Anamorsin OS=Rattus norvegicus OX=10116 GN=Ciapin1 PE=1 SV=1	CPIN1_RAT	Ciapin1	0.465	0.21	0.21	0.465	0	0.332	0.21	0.332
WW domain-binding protein 2 OS=Rattus norvegicus OX=10116 GN=Wbp2 PE=1 SV=1	WBP2_RAT	Wbp2	0	0.25	0	0.398	0	0	0.25	0.25
Thioredoxin domain-containing protein 12 OS=Rattus norvegicus OX=10116 GN=Txndc12 PE=2 SV=2	TXD12_RAT	Txndc12	0.629	0	0.629	0.385	0	0.917	0.629	0
ER membrane protein complex subunit 2 OS=Rattus norvegicus OX=10116 GN=Emc2 PE=2 SV=1	EMC2_RAT	Emc2	0	0.436	0	0.436	0.198	0.312	0	0.198
Tyrosine--tRNA ligase, mitochondrial OS=Rattus norvegicus OX=10116 GN=Yars2 PE=2 SV=1	SYYM_RAT	Yars2	0	0.129	0	0	0	0	0	0.129
Beclin-1 OS=Rattus norvegicus OX=10116 GN=Becn1 PE=1 SV=1	BECN1_RAT	Becn1	0	0	0	0	0	0	0.131	0
ATPase WRNIP1 OS=Rattus norvegicus OX=10116 GN=Wrnip1 PE=1 SV=1	WRIP1_RAT	Wrnip1	0	0	0	0	0.0929	0	0	0
Rab effector Noc2 OS=Rattus norvegicus OX=10116 GN=Rph3al PE=1 SV=1	RPH3L_RAT	Rph3al	0.208	0.208	0.208	0	0	0	0	0.208
Enolase-phosphatase E1 OS=Rattus norvegicus OX=10116 GN=Enoph1 PE=2 SV=1	ENOPH_RAT	Enoph1	0	0	0.545	0.386	0.386	0	0.545	0.386
Actin-like protein 6B OS=Rattus norvegicus OX=10116 GN=Actl6b PE=1 SV=2	ACL6B_RAT	Actl6b	0	0.145	0.145	0	0	0	0.145	0.145
39S ribosomal protein L23, mitochondrial OS=Rattus norvegicus OX=10116 GN=Mrpl23 PE=2 SV=1	RM23_RAT	Mrpl23	0.433	0	0	0	0.433	0	0	0
Elongation factor Ts, mitochondrial OS=Rattus norvegicus OX=10116 GN=Tsfm PE=2 SV=1	EFTS_RAT	Tsfm	0	0	0	0	0	0	0.309	0
BAG family molecular chaperone regulator 5 OS=Rattus norvegicus OX=10116 GN=Bag5 PE=1 SV=1	BAG5_RAT	Bag5	0	0	0	0.133	0	0.206	0	0
Golgi resident protein GCP60 OS=Rattus norvegicus OX=10116 GN=Acbd3 PE=1 SV=3	GCP60_RAT	Acbd3	0	0	0	0.111	0.235	0.111	0	0
Single-stranded DNA-binding protein 3 OS=Rattus norvegicus OX=10116 GN=Ssbp3 PE=1 SV=1	SSBP3_RAT	Ssbp3	0	0.182	0	0	0	0	0.182	0
Deoxyuridine 5'-triphosphate nucleotidohydrolase OS=Rattus norvegicus OX=10116 GN=Dut PE=2 SV=3	DUT_RAT	Dut	1.03	0.327	0.76	0.528	0.528	0.76	0.76	0.327
Transmembrane emp24 domain-containing protein 7 OS=Rattus norvegicus OX=10116 GN=Tmed7 PE=1 SV=1	TMED7_RAT	Tmed7	0.279	0.279	0.446	0	0.635	0	0	0.446
60S ribosomal protein L36a OS=Rattus norvegicus OX=10116 GN=Rpl36a PE=1 SV=2	RL36A_RAT	Rpl36a	0.624	0	0.624	0.624	0	0.624	0	0
Chloride intracellular channel protein 4 OS=Rattus norvegicus OX=10116 GN=Clic4 PE=1 SV=3	CLIC4_RAT	Clic4	0	0	0	0.245	0	0	0	0.245
Renin receptor OS=Rattus norvegicus OX=10116 GN=Atp6ap2 PE=2 SV=1	RENR_RAT	Atp6ap2	0	0	0	0.176	0.176	0.176	0	0.176
Ectonucleotide pyrophosphatase/phosphodiesterase family member 3 OS=Rattus norvegicus OX=10116 GN=Enpp3 PE=1 SV=2	ENPP3_RAT	Enpp3	0	0	0.0669	0	0	0	0	0
Microtubule-associated protein RP/EB family member 2 OS=Rattus norvegicus OX=10116 GN=Mapre2 PE=1 SV=1	MARE2_RAT	Mapre2	0.186	0.292	0	0	0	0.186	0	0
Ras-related protein Rab-4A OS=Rattus norvegicus OX=10116 GN=Rab4a PE=1 SV=3	RAB4A_RAT	Rab4a	0.894	0	0	0	0.667	0	0	0
Bis(5'-nucleosyl)-tetraphosphatase [asymmetrical] OS=Rattus norvegicus OX=10116 GN=Nudt2 PE=2 SV=3	AP4A_RAT	Nudt2	1.07	0	0	0	0.726	0	0	0.726
Mitochondrial pyruvate carrier 2 OS=Rattus norvegicus OX=10116 GN=Mpc2 PE=2 SV=1	MPC2_RAT	Mpc2	0.534	0.534	0	0	0	0.901	0	0
7-methylguanosine phosphate-specific 5'-nucleotidase OS=Rattus norvegicus OX=10116 GN=Nt5c3b PE=2 SV=2	5NT3B_RAT	Nt5c3b	0.2	0.2	0.2	0	0	0.2	0.2	0.315
Solute carrier family 12 member 9 OS=Rattus norvegicus OX=10116 GN=Slc12a9 PE=1 SV=1	S12A9_RAT	Slc12a9	0.0691	0	0.0691	0	0.0691	0.0691	0.0691	0.0691
Clathrin light chain B OS=Rattus norvegicus OX=10116 GN=Cltb PE=1 SV=1	CLCB_RAT	Cltb	0	0.283	0	0	0	0.645	0	0
Protein arginine N-methyltransferase 3 OS=Rattus norvegicus OX=10116 GN=Prmt3 PE=1 SV=1	ANM3_RAT	Prmt3	0.113	0.113	0.113	0.175	0	0.175	0	0
Integrator complex subunit 12 OS=Rattus norvegicus OX=10116 GN=Ints12 PE=1 SV=1	INT12_RAT	Ints12	0	0.14	0	0	0	0	0	0
Bystin OS=Rattus norvegicus OX=10116 GN=Bysl PE=1 SV=3	BYST_RAT	Bysl	0	0	0	0	0	0	0	0.136
2-iminobutanoate/2-iminopropanoate deaminase OS=Rattus norvegicus OX=10116 GN=Rida PE=1 SV=3	RIDA_RAT	Rida	0	0.53	0.892	0.53	0.892	0.892	0.892	0.892
Translation initiation factor eIF-2B subunit beta OS=Rattus norvegicus OX=10116 GN=Eif2b2 PE=2 SV=1	EI2BB_RAT	Eif2b2	0.177	0.177	0.177	0	0	0.385	0	0.177
Protein farnesyltransferase/geranylgeranyltransferase type-1 subunit alpha OS=Rattus norvegicus OX=10116 GN=Fnta PE=1 SV=1	FNTA_RAT	Fnta	0	0.333	0.241	0.155	0.155	0	0.241	0
Elongin-C OS=Rattus norvegicus OX=10116 GN=Eloc PE=1 SV=1	ELOC_RAT	Eloc	0	0	0	0	0	1.07	0	0
Ragulator complex protein LAMTOR1 OS=Rattus norvegicus OX=10116 GN=Lamtor1 PE=1 SV=1	LTOR1_RAT	Lamtor1	1.38	0.414	0.414	0	0.414	0.414	0.414	0.414
ADP-ribosylation factor-related protein 1 OS=Rattus norvegicus OX=10116 GN=Arfrp1 PE=2 SV=1	ARFRP_RAT	Arfrp1	0.316	0	0	0.316	0	0	0	0
Ras-like protein family member 11B OS=Rattus norvegicus OX=10116 GN=Rasl11b PE=2 SV=1	RSLBB_RAT	Rasl11b	0	0	0	0	0.258	0.258	0	0
Cilia- and flagella-associated protein 36 OS=Rattus norvegicus OX=10116 GN=Cfap36 PE=1 SV=1	CFA36_RAT	Cfap36	0	0	0	0.174	0	0	0	0.174
Arf-GAP domain and FG repeat-containing protein 1 OS=Rattus norvegicus OX=10116 GN=Agfg1 PE=1 SV=1	AGFG1_RAT	Agfg1	0.116	0.179	0	0	0	0	0	0
G-protein coupled receptor family C group 6 member A OS=Rattus norvegicus OX=10116 GN=Gprc6a PE=1 SV=1	GPC6A_RAT	Gprc6a	0	0	0	0	0.0634	0	0	0
Protein MEMO1 OS=Rattus norvegicus OX=10116 GN=Memo1 PE=1 SV=1	MEMO1_RAT	Memo1	0.597	0.324	0	0.324	0	0.324	0	0.324
CST complex subunit STN1 OS=Rattus norvegicus OX=10116 GN=Stn1 PE=2 SV=1	STN1_RAT	Stn1	0	0.145	0	0.226	0	0	0	0
Diphosphoinositol polyphosphate phosphohydrolase 2 OS=Rattus norvegicus OX=10116 GN=Nudt4 PE=2 SV=1	NUDT4_RAT	Nudt4	0.361	0.588	0.361	0.588	0.588	0.361	0.852	0.852
Acyl-protein thioesterase 1 OS=Rattus norvegicus OX=10116 GN=Lypla1 PE=1 SV=1	LYPA1_RAT	Lypla1	0.288	0	0.288	0	0.288	0.288	0.288	0.288
Actin-related protein 2/3 complex subunit 5-like protein OS=Rattus norvegicus OX=10116 GN=Arpc5l PE=1 SV=2	ARP5L_RAT	Arpc5l	0.436	0	0	0.436	0	0.436	0.436	0.436
Osteoclast-stimulating factor 1 OS=Rattus norvegicus OX=10116 GN=Ostf1 PE=1 SV=1	OSTF1_RAT	Ostf1	0	0	0	0	0	0	0	0.302
Ras-related protein Rap-1A OS=Rattus norvegicus OX=10116 GN=Rap1a PE=1 SV=1	RAP1A_RAT	Rap1a	9.65	0	6.92	0	6.92	6.92	8.18	0
Coactosin-like protein OS=Rattus norvegicus OX=10116 GN=Cotl1 PE=1 SV=1	COTL1_RAT	Cotl1	0.471	0	0	0	0	0	0	0
Glutamate--cysteine ligase regulatory subunit OS=Rattus norvegicus OX=10116 GN=Gclm PE=1 SV=1	GSH0_RAT	Gclm	0.229	0.362	0	0.362	0	0.362	0.229	0
THO complex subunit 5 homolog OS=Rattus norvegicus OX=10116 GN=Thoc5 PE=2 SV=1	THOC5_RAT	Thoc5	0.0848	0	0	0	0	0	0	0
Oligoribonuclease, mitochondrial OS=Rattus norvegicus OX=10116 GN=Rexo2 PE=2 SV=1	ORN_RAT	Rexo2	0.42	0.264	0.264	0.264	0	0.264	0.42	0.264
Leukocyte surface antigen CD47 OS=Rattus norvegicus OX=10116 GN=Cd47 PE=1 SV=1	CD47_RAT	Cd47	0.21	0.332	0.21	0.21	0.21	0.332	0	0.21
PEST proteolytic signal-containing nuclear protein OS=Rattus norvegicus OX=10116 GN=Pcnp PE=1 SV=1	PCNP_RAT	Pcnp	0	0	0.359	0	0.584	0.359	0	0.359
Di-N-acetylchitobiase OS=Rattus norvegicus OX=10116 GN=Ctbs PE=1 SV=1	DIAC_RAT	Ctbs	0	0.257	0.165	0.257	0.257	0	0.357	0.357
NmrA-like family domain-containing protein 1 (Fragments) OS=Rattus norvegicus OX=10116 GN=Nmral1 PE=1 SV=1	NMRL1_RAT	Nmral1	0	0	0.439	0	0	0.439	0	0.439
Nuclear transport factor 2 OS=Rattus norvegicus OX=10116 GN=Nutf2 PE=1 SV=1	NTF2_RAT	Nutf2	0	0	0.883	0	0	0	0.525	0
FXYD domain-containing ion transport regulator 6 OS=Rattus norvegicus OX=10116 GN=Fxyd6 PE=1 SV=1	FXYD6_RAT	Fxyd6	2.13	0.769	0.769	0	0	0	0	0
m-AAA protease-interacting protein 1, mitochondrial OS=Rattus norvegicus OX=10116 GN=Maip1 PE=2 SV=1	MAIP1_RAT	Maip1	0.463	0	0	0.21	0	0.21	0.21	0.331
NHP2-like protein 1 OS=Rattus norvegicus OX=10116 GN=Snu13 PE=2 SV=4	NH2L1_RAT	Snu13	0.534	0.534	0	0	0	0	0	0.534
Arylsulfatase B OS=Rattus norvegicus OX=10116 GN=Arsb PE=2 SV=2	ARSB_RAT	Arsb	0	0.114	0	0	0	0.114	0	0
GDP-fucose protein O-fucosyltransferase 1 OS=Rattus norvegicus OX=10116 GN=Pofut1 PE=1 SV=1	OFUT1_RAT	Pofut1	0	0	0.236	0.152	0.152	0.152	0.326	0.236
Serine/threonine-protein kinase DCLK1 OS=Rattus norvegicus OX=10116 GN=Dclk1 PE=1 SV=1	DCLK1_RAT	Dclk1	0.221	0	0.143	0.143	0.143	0	0	0
NAD-dependent protein deacylase sirtuin-5, mitochondrial OS=Rattus norvegicus OX=10116 GN=Sirt5 PE=2 SV=1	SIR5_RAT	Sirt5	0	0	0	0	0	0.203	0	0.203
Cysteine and glycine-rich protein 2 OS=Rattus norvegicus OX=10116 GN=Csrp2 PE=1 SV=3	CSRP2_RAT	Csrp2	0.558	0.344	0.344	0	0.344	0	0.344	0.344
Elongator complex protein 2 OS=Rattus norvegicus OX=10116 GN=Elp2 PE=2 SV=1	ELP2_RAT	Elp2	0.111	0.0724	0.0724	0.111	0.0724	0	0.111	0.0724
Fuctinin-3 (Fragment) OS=Rattus norvegicus OX=10116 PE=1 SV=1	FUC3_RAT		0	10.3	5.14	0	0	19.6	0	0
Cytochrome P450 20A1 OS=Rattus norvegicus OX=10116 GN=Cyp20a1 PE=2 SV=1	CP20A_RAT	Cyp20a1	0	0.13	0	0.13	0	0	0	0
Protein phosphatase 1B OS=Rattus norvegicus OX=10116 GN=Ppm1b PE=2 SV=1	PPM1B_RAT	Ppm1b	0	0	0	0	0	0.248	0	0
Gamma-adducin OS=Rattus norvegicus OX=10116 GN=Add3 PE=1 SV=2	ADDG_RAT	Add3	0	0.0846	0	0.0846	0	0.0846	0	0
Serine--pyruvate aminotransferase, mitochondrial OS=Rattus norvegicus OX=10116 GN=Agxt PE=1 SV=1	SPYA_RAT	Agxt	0	0	0	0	0	0	0	0.148
Double-stranded RNA-specific editase 1 OS=Rattus norvegicus OX=10116 GN=Adarb1 PE=1 SV=1	RED1_RAT	Adarb1	0.0855	0	0	0	0	0	0	0
Sodium/calcium exchanger 1 OS=Rattus norvegicus OX=10116 GN=Slc8a1 PE=1 SV=3	NAC1_RAT	Slc8a1	0	0.0931	0	0	0.0611	0	0	0
Prefoldin subunit 2 OS=Rattus norvegicus OX=10116 GN=Pfdn2 PE=2 SV=1	PFD2_RAT	Pfdn2	0.449	0.449	0.449	0.449	0.449	0.449	0.449	0.449
Nucleoporin NUP35 OS=Rattus norvegicus OX=10116 GN=Nup35 PE=1 SV=1	NUP35_RAT	Nup35	0	0.313	0.199	0.199	0.199	0.313	0.313	0.199
1,2-dihydroxy-3-keto-5-methylthiopentene dioxygenase OS=Rattus norvegicus OX=10116 GN=Adi1 PE=2 SV=1	MTND_RAT	Adi1	0.336	0.336	0	0.336	0.336	0.336	0	0
Glutamate-rich WD repeat-containing protein 1 OS=Rattus norvegicus OX=10116 GN=Grwd1 PE=2 SV=1	GRWD1_RAT	Grwd1	0	0.138	0	0.138	0	0.138	0	0
Solute carrier family 35 member G2 OS=Rattus norvegicus OX=10116 GN=Slc35g2 PE=1 SV=1	S35G2_RAT	Slc35g2	0.146	0	0.146	0.227	0.146	0.313	0	0.146
Neurocalcin-delta OS=Rattus norvegicus OX=10116 GN=Ncald PE=1 SV=3	NCALD_RAT	Ncald	1.01	0.522	0.751	0.522	0	0.751	0.751	0
Splicing factor U2AF 26 kDa subunit OS=Rattus norvegicus OX=10116 GN=U2af1l4 PE=2 SV=1	U2AF4_RAT	U2af1l4	0	0	0	0.273	0	0	0	0
Crk-like protein OS=Rattus norvegicus OX=10116 GN=Crkl PE=1 SV=1	CRKL_RAT	Crkl	0.451	0.205	0	0.322	0	0.322	0.322	0
Neuronal vesicle trafficking-associated protein 1 OS=Rattus norvegicus OX=10116 GN=Nsg1 PE=1 SV=2	NSG1_RAT	Nsg1	0	0	0	0	0	0.344	0	0
DNA-3-methyladenine glycosylase (Fragment) OS=Rattus norvegicus OX=10116 GN=Mpg PE=2 SV=2	3MG_RAT	Mpg	0	0	0	0	0	0	0	0.199
Tyrosine-protein phosphatase non-receptor type 6 OS=Rattus norvegicus OX=10116 GN=Ptpn6 PE=1 SV=1	PTN6_RAT	Ptpn6	0	0	0	0	0.0963	0.148	0	0
Kelch-like protein 24 OS=Rattus norvegicus OX=10116 GN=Klhl24 PE=1 SV=1	KLH24_RAT	Klhl24	0	0	0	0	0	0.0981	0	0
THO complex subunit 1 OS=Rattus norvegicus OX=10116 GN=Thoc1 PE=2 SV=1	THOC1_RAT	Thoc1	0	0.171	0	0	0	0	0	0
Serum response factor-binding protein 1 OS=Rattus norvegicus OX=10116 GN=Srfbp1 PE=1 SV=1	SRFB1_RAT	Srfbp1	0	0	0	0.138	0	0	0	0
Bcl-2-like protein 1 OS=Rattus norvegicus OX=10116 GN=Bcl2l1 PE=1 SV=2	B2CL1_RAT	Bcl2l1	0.27	0.431	0.27	0	0.431	0.27	0.431	0.431
Class I histocompatibility antigen, Non-RT1.A alpha-1 chain OS=Rattus norvegicus OX=10116 GN=RT1-Aw2 PE=1 SV=1	HA11_RAT	RT1-Aw2	0.189	0.296	0.189	0.189	0.189	0.296	0	0.189
Prostaglandin E synthase 3 OS=Rattus norvegicus OX=10116 GN=Ptges3 PE=1 SV=2	TEBP_RAT	Ptges3	0.638	0	0.39	0.39	0.638	0	0.39	0.39
Cytochrome b-c1 complex subunit 8 OS=Rattus norvegicus OX=10116 GN=Uqcrq PE=3 SV=1	QCR8_RAT	Uqcrq	0	0	0	0.822	0	0	0	0
Sialate O-acetylesterase OS=Rattus norvegicus OX=10116 GN=Siae PE=1 SV=2	SIAE_RAT	Siae	0.111	0.111	0	0	0.111	0.172	0.172	0.111
Vacuolar protein sorting-associated protein 28 homolog OS=Rattus norvegicus OX=10116 GN=Vps28 PE=2 SV=1	VPS28_RAT	Vps28	0.271	0	0	0	0	0	0	0.271
Mitochondrial Rho GTPase 2 OS=Rattus norvegicus OX=10116 GN=Rhot2 PE=1 SV=1	MIRO2_RAT	Rhot2	0	0	0	0	0.0968	0	0.0968	0
Ufm1-specific protease 2 OS=Rattus norvegicus OX=10116 GN=Ufsp2 PE=2 SV=1	UFSP2_RAT	Ufsp2	0.129	0	0	0.129	0.2	0	0	0
Evolutionarily conserved signaling intermediate in Toll pathway, mitochondrial OS=Rattus norvegicus OX=10116 GN=Ecsit PE=1 SV=1	ECSIT_RAT	Ecsit	0	0.212	0	0	0	0	0.137	0
Anion exchange protein 2 OS=Rattus norvegicus OX=10116 GN=Slc4a2 PE=1 SV=1	B3A2_RAT	Slc4a2	0	0.0482	0	0	0	0	0	0
Ribonucleoside-diphosphate reductase subunit M2 OS=Rattus norvegicus OX=10116 GN=Rrm2 PE=2 SV=1	RIR2_RAT	Rrm2	0	0.236	0	0	0	0	0	0
Flotillin-2 OS=Rattus norvegicus OX=10116 GN=Flot2 PE=1 SV=1	FLOT2_RAT	Flot2	0	0	0	0.144	0	0.144	0	0
Paired box protein Pax-6 OS=Rattus norvegicus OX=10116 GN=Pax6 PE=2 SV=1	PAX6_RAT	Pax6	0	0	0	0	0	0.145	0	0
Conserved oligomeric Golgi complex subunit 7 OS=Rattus norvegicus OX=10116 GN=Cog7 PE=2 SV=1	COG7_RAT	Cog7	0	0	0	0	0.0772	0	0	0
N-alpha-acetyltransferase 35, NatC auxiliary subunit OS=Rattus norvegicus OX=10116 GN=Naa35 PE=1 SV=1	NAA35_RAT	Naa35	0	0	0	0	0.08	0	0	0
MOB kinase activator 1A OS=Rattus norvegicus OX=10116 GN=Mob1a PE=2 SV=3	MOB1A_RAT	Mob1a	0.453	0.283	0.283	0	0.453	0.283	0.283	0.283
Neudesin OS=Rattus norvegicus OX=10116 GN=Nenf PE=2 SV=1	NENF_RAT	Nenf	0.385	0.385	0.385	0.385	0.629	0	0.629	0.385
Tumor protein p53-inducible protein 11 OS=Rattus norvegicus OX=10116 GN=Tp53i11 PE=1 SV=1	P5I11_RAT	Tp53i11	0	0.344	0.344	0.344	0	0.344	0.344	0
Cyclin-dependent kinase 2 OS=Rattus norvegicus OX=10116 GN=Cdk2 PE=1 SV=1	CDK2_RAT	Cdk2	0	0.451	0	0.593	0	0	0	0
Ubiquitin-conjugating enzyme E2 Z OS=Rattus norvegicus OX=10116 GN=Ube2z PE=1 SV=2	UBE2Z_RAT	Ube2z	0	0	0	0.179	0.179	0	0.281	0
Ceruloplasmin OS=Rattus norvegicus OX=10116 GN=Cp PE=1 SV=3	CERU_RAT	Cp	0	0	0	0	0.0546	0	0	0
Synaptotagmin-like protein 5 OS=Rattus norvegicus OX=10116 GN=Sytl5 PE=2 SV=1	SYTL5_RAT	Sytl5	0	0	0	0	0	0	0	0.0796
Pyridoxal phosphate phosphatase OS=Rattus norvegicus OX=10116 GN=Pdxp PE=1 SV=2	PLPP_RAT	Pdxp	0.21	0.21	0.21	0.21	0.21	0.21	0.21	0.21
YrdC domain-containing protein, mitochondrial OS=Rattus norvegicus OX=10116 GN=Yrdc PE=2 SV=1	YRDC_RAT	Yrdc	0	0.24	0.24	0.24	0.381	0	0.24	0.24
Mitochondrial glutamate carrier 2 OS=Rattus norvegicus OX=10116 GN=Slc25a18 PE=2 SV=2	GHC2_RAT	Slc25a18	0.446	0	0	0.202	0	0	0.202	0.202
Syntaxin-8 OS=Rattus norvegicus OX=10116 GN=Stx8 PE=1 SV=1	STX8_RAT	Stx8	0	0	0	0	0	0.262	0	0
Glycolipid transfer protein OS=Rattus norvegicus OX=10116 GN=GLTP PE=2 SV=1	GLTP_RAT	GLTP	0.302	0	0	0	0	0	0	0.302
Vesicle-associated membrane protein 8 OS=Rattus norvegicus OX=10116 GN=Vamp8 PE=1 SV=1	VAMP8_RAT	Vamp8	1.88	0	0.698	0	0	0	0.698	0
UBX domain-containing protein 4 OS=Rattus norvegicus OX=10116 GN=Ubxn4 PE=1 SV=1	UBXN4_RAT	Ubxn4	0.185	0.185	0	0.12	0.185	0	0.12	0
Endophilin-B2 OS=Rattus norvegicus OX=10116 GN=Sh3glb2 PE=1 SV=2	SHLB2_RAT	Sh3glb2	0	0	0.236	0.327	0	0	0	0
CCR4-NOT transcription complex subunit 9 OS=Rattus norvegicus OX=10116 GN=Cnot9 PE=1 SV=1	CNOT9_RAT	Cnot9	0	0.206	0	0	0	0	0.206	0.206
SH2 domain-containing protein 4A OS=Rattus norvegicus OX=10116 GN=Sh2d4a PE=2 SV=1	SH24A_RAT	Sh2d4a	0	0.14	0	0	0	0	0	0
Atypical kinase COQ8A, mitochondrial OS=Rattus norvegicus OX=10116 GN=Coq8a PE=2 SV=1	COQ8A_RAT	Coq8a	0.0926	0	0	0	0	0	0	0
Regulator of microtubule dynamics protein 1 OS=Rattus norvegicus OX=10116 GN=Rmdn1 PE=2 SV=1	RMD1_RAT	Rmdn1	0.306	0	0	0	0	0	0.195	0
Amidophosphoribosyltransferase OS=Rattus norvegicus OX=10116 GN=Ppat PE=1 SV=1	PUR1_RAT	Ppat	0	0	0	0.117	0	0	0	0
Amyloid-beta A4 protein OS=Rattus norvegicus OX=10116 GN=App PE=1 SV=2	A4_RAT	App	0	0	0	0	0	0	0.0767	0
Ras-related protein Rab-11B OS=Rattus norvegicus OX=10116 GN=Rab11b PE=1 SV=4	RB11B_RAT	Rab11b	4.98	2.59	3.08	4.26	3.63	4.26	3.08	4.26
Calcium-regulated heat stable protein 1 OS=Rattus norvegicus OX=10116 GN=Carhsp1 PE=1 SV=1	CHSP1_RAT	Carhsp1	0.783	0.471	0	0	0	0	0	0.471
BRISC and BRCA1-A complex member 1 OS=Rattus norvegicus OX=10116 GN=Babam1 PE=1 SV=1	BABA1_RAT	Babam1	0	0.187	0	0.293	0	0	0	0
Protein dpy-30 homolog OS=Rattus norvegicus OX=10116 GN=Dpy30 PE=1 SV=1	DPY30_RAT	Dpy30	1.23	1.23	0	0	0	0	1.23	0
Methionine adenosyltransferase 2 subunit beta OS=Rattus norvegicus OX=10116 GN=Mat2b PE=2 SV=1	MAT2B_RAT	Mat2b	0.403	0.185	0	0	0	0.289	0.185	0.185
SPRY domain-containing protein 7 OS=Rattus norvegicus OX=10116 GN=Spryd7 PE=2 SV=1	SPRY7_RAT	Spryd7	0.332	0	0.332	0	0.332	0.332	0	0
Protein OS-9 OS=Rattus norvegicus OX=10116 GN=Os9 PE=1 SV=1	OS9_RAT	Os9	0.0885	0	0	0	0	0.0885	0	0
2-methoxy-6-polyprenyl-1,4-benzoquinol methylase, mitochondrial OS=Rattus norvegicus OX=10116 GN=Coq5 PE=2 SV=1	COQ5_RAT	Coq5	0	0	0.185	0.289	0	0	0	0.185
Transcription elongation factor, mitochondrial OS=Rattus norvegicus OX=10116 GN=Tefm PE=2 SV=1	TEFM_RAT	Tefm	0.165	0	0	0	0	0	0	0
Torsin-2A OS=Rattus norvegicus OX=10116 GN=Tor2a PE=2 SV=1	TOR2A_RAT	Tor2a	0	0	0	0	0.302	0.192	0	0
[Protein ADP-ribosylarginine] hydrolase OS=Rattus norvegicus OX=10116 GN=Adprh PE=1 SV=2	ADPRH_RAT	Adprh	0	0.172	0	0	0	0	0.268	0
IST1 homolog OS=Rattus norvegicus OX=10116 GN=Ist1 PE=2 SV=1	IST1_RAT	Ist1	0	0	0	0	0	0.172	0	0
Aflatoxin B1 aldehyde reductase member 2 OS=Rattus norvegicus OX=10116 GN=Akr7a2 PE=1 SV=2	ARK72_RAT	Akr7a2	0.169	0.263	0	0.169	0	0	0	0.263
Diacylglycerol O-acyltransferase 1 OS=Rattus norvegicus OX=10116 GN=Dgat1 PE=2 SV=1	DGAT1_RAT	Dgat1	0	0.119	0	0	0.119	0	0.119	0
Wnt inhibitory factor 1 OS=Rattus norvegicus OX=10116 GN=Wif1 PE=2 SV=1	WIF1_RAT	Wif1	0.165	0.165	0	0.165	0	0	0.165	0.257
DNA polymerase epsilon subunit 3 OS=Rattus norvegicus OX=10116 GN=Pole3 PE=1 SV=1	DPOE3_RAT	Pole3	0	0	0	0.446	0	0	0	0
Integrin-linked kinase-associated serine/threonine phosphatase 2C OS=Rattus norvegicus OX=10116 GN=Ilkap PE=2 SV=1	ILKAP_RAT	Ilkap	0	0	0	0	0	0.16	0	0
Tubulin-specific chaperone A OS=Rattus norvegicus OX=10116 GN=Tbca PE=1 SV=1	TBCA_RAT	Tbca	1.58	0	0	0	0	0.605	0	0
RNA-binding protein Nova-1 (Fragment) OS=Rattus norvegicus OX=10116 GN=Nova1 PE=2 SV=1	NOVA1_RAT	Nova1	0	0	0	0.218	0	0	0	0
Diphosphoinositol polyphosphate phosphohydrolase 1 OS=Rattus norvegicus OX=10116 GN=Nudt3 PE=1 SV=1	NUDT3_RAT	Nudt3	0.382	0.382	0.382	0.382	0.382	0.382	0.382	0.382
LIM domain-containing protein 2 OS=Rattus norvegicus OX=10116 GN=Limd2 PE=2 SV=1	LIMD2_RAT	Limd2	0.901	0	0	0	0	0	0	0
Trafficking protein particle complex subunit 2 OS=Rattus norvegicus OX=10116 GN=Trappc2 PE=3 SV=1	TPPC2_RAT	Trappc2	0.453	0.453	0	0.453	0	0	0.453	0.453
Transmembrane protein 126A OS=Rattus norvegicus OX=10116 GN=Tmem126a PE=2 SV=1	T126A_RAT	Tmem126a	0.538	0	0	0.332	0	0	0	0
Cell adhesion molecule 4 OS=Rattus norvegicus OX=10116 GN=Cadm4 PE=1 SV=1	CADM4_RAT	Cadm4	0	0	0	0	0.249	0.16	0	0
RWD domain-containing protein 1 OS=Rattus norvegicus OX=10116 GN=Rwdd1 PE=2 SV=1	RWDD1_RAT	Rwdd1	0.403	0	0	0	0	0	0.759	0
Alpha-ketoglutarate-dependent dioxygenase FTO OS=Rattus norvegicus OX=10116 GN=Fto PE=2 SV=1	FTO_RAT	Fto	0	0.116	0	0.116	0	0	0.116	0.116
Nuclear ubiquitous casein and cyclin-dependent kinase substrate 1 OS=Rattus norvegicus OX=10116 GN=Nucks1 PE=1 SV=1	NUCKS_RAT	Nucks1	0	0.26	0.26	0.26	0	0	0.26	0
Peroxisomal biogenesis factor 3 OS=Rattus norvegicus OX=10116 GN=Pex3 PE=1 SV=1	PEX3_RAT	Pex3	0	0.162	0	0	0	0.162	0	0
Importin-13 OS=Rattus norvegicus OX=10116 GN=Ipo13 PE=2 SV=1	IPO13_RAT	Ipo13	0	0	0	0	0	0.0611	0	0
Up-regulated during skeletal muscle growth protein 5 OS=Rattus norvegicus OX=10116 GN=Usmg5 PE=1 SV=1	USMG5_RAT	Usmg5	1.41	0	0	0	0	1.41	1.41	1.41
Vesicle-associated membrane protein 2 OS=Rattus norvegicus OX=10116 GN=Vamp2 PE=1 SV=2	VAMP2_RAT	Vamp2	1.6	0	0	0	0	0	1.05	1.6
Guanine nucleotide-binding protein G(k) subunit alpha OS=Rattus norvegicus OX=10116 GN=Gnai3 PE=1 SV=3	GNAI3_RAT	Gnai3	0.728	0	0.728	0	0	0.868	1.02	0
Lysophosphatidylcholine acyltransferase 1 OS=Rattus norvegicus OX=10116 GN=Lpcat1 PE=2 SV=2	PCAT1_RAT	Lpcat1	0	0	0	0.113	0.113	0	0	0
Wiskott-Aldrich syndrome protein family member 1 OS=Rattus norvegicus OX=10116 GN=Wasf1 PE=1 SV=1	WASF1_RAT	Wasf1	0	0	0	0	0	0.109	0	0
Syntaxin-18 OS=Rattus norvegicus OX=10116 GN=Stx18 PE=2 SV=1	STX18_RAT	Stx18	0	0	0	0	0.178	0	0	0
Peptidyl-prolyl cis-trans isomerase FKBP1A OS=Rattus norvegicus OX=10116 GN=Fkbp1a PE=1 SV=3	FKB1A_RAT	Fkbp1a	1.14	0.659	0.659	0.659	0.659	0.659	0.659	0.659
39S ribosomal protein L14, mitochondrial OS=Rattus norvegicus OX=10116 GN=Mrpl14 PE=1 SV=2	RM14_RAT	Mrpl14	0.471	0	0	0	0.471	0	0.471	0
Regulated endocrine-specific protein 18 OS=Rattus norvegicus OX=10116 GN=Resp18 PE=2 SV=1	RES18_RAT	Resp18	0.375	0.375	0	0.375	0.375	0	0	0
Cleavage and polyadenylation specificity factor subunit 4 OS=Rattus norvegicus OX=10116 GN=Cpsf4 PE=2 SV=1	CPSF4_RAT	Cpsf4	0	0	0.257	0.257	0	0.257	0	0.257
Surfeit locus protein 1 OS=Rattus norvegicus OX=10116 GN=Surf1 PE=2 SV=1	SURF1_RAT	Surf1	0	0	0.2	0.2	0	0	0	0
Ribose-phosphate pyrophosphokinase 2 OS=Rattus norvegicus OX=10116 GN=Prps2 PE=1 SV=3	PRPS2_RAT	Prps2	0	1.71	0	1.97	0	0	0	1.48
Vacuolar protein sorting-associated protein 26A OS=Rattus norvegicus OX=10116 GN=Vps26a PE=1 SV=1	VP26A_RAT	Vps26a	0	0	0	0.181	0	0	0	0
2-oxoglutarate and iron-dependent oxygenase domain-containing protein 3 OS=Rattus norvegicus OX=10116 GN=Ogfod3 PE=2 SV=1	OGFD3_RAT	Ogfod3	0	0.195	0	0	0	0	0.195	0
LanC-like protein 1 OS=Rattus norvegicus OX=10116 GN=Lancl1 PE=1 SV=2	LANC1_RAT	Lancl1	0.234	0	0	0	0	0.151	0	0.151
NADH-ubiquinone oxidoreductase chain 2 OS=Rattus norvegicus OX=10116 GN=Mtnd2 PE=3 SV=3	NU2M_RAT	Mtnd2	0.178	0	0.178	0	0	0	0	0
N-acetylgalactosamine kinase OS=Rattus norvegicus OX=10116 GN=Galk2 PE=2 SV=1	GALK2_RAT	Galk2	0	0.135	0.135	0	0.135	0	0	0
Hydroxymethylglutaryl-CoA lyase, mitochondrial OS=Rattus norvegicus OX=10116 GN=Hmgcl PE=2 SV=1	HMGCL_RAT	Hmgcl	0	0	0	0.202	0	0	0	0
WASH complex subunit 1 OS=Rattus norvegicus OX=10116 GN=Washc1 PE=2 SV=1	WASH1_RAT	Washc1	0	0	0	0.132	0	0.204	0	0
Glycerol-3-phosphate phosphatase OS=Rattus norvegicus OX=10116 GN=Pgp PE=1 SV=1	PGP_RAT	Pgp	0.2	0	0	0	0	0	0	0
Serine/threonine-protein kinase 3 OS=Rattus norvegicus OX=10116 GN=Stk3 PE=1 SV=1	STK3_RAT	Stk3	0	0	0.12	0	0.12	0	0	0
Glutamate receptor 2 OS=Rattus norvegicus OX=10116 GN=Gria2 PE=1 SV=2	GRIA2_RAT	Gria2	0.0671	0	0	0	0	0	0	0
Ubiquinol-cytochrome-c reductase complex assembly factor 2 OS=Rattus norvegicus OX=10116 GN=Uqcc2 PE=2 SV=1	UQCC2_RAT	Uqcc2	0.757	0.456	0.456	0.456	0	0.456	0.456	0.456
Calcineurin B homologous protein 1 OS=Rattus norvegicus OX=10116 GN=Chp1 PE=1 SV=2	CHP1_RAT	Chp1	0.32	0	0	0	0	0	0	0
40S ribosomal protein S30 OS=Rattus norvegicus OX=10116 GN=Fau PE=1 SV=1	RS30_RAT	Fau	0	1.35	0	0	0	0	0	0
Calmodulin-like protein 3 OS=Rattus norvegicus OX=10116 GN=Calml3 PE=2 SV=1	CALL3_RAT	Calml3	0	0	2	0	0	2	0	0
Lysosomal acid lipase/cholesteryl ester hydrolase OS=Rattus norvegicus OX=10116 GN=Lipa PE=2 SV=1	LICH_RAT	Lipa	0	0	0	0	0	0	0.151	0
Glutathione S-transferase theta-2 OS=Rattus norvegicus OX=10116 GN=Gstt2 PE=1 SV=3	GSTT2_RAT	Gstt2	0.409	0	0.257	0	0	0	0	0
39S ribosomal protein L17, mitochondrial OS=Rattus norvegicus OX=10116 GN=Mrpl17 PE=2 SV=1	RM17_RAT	Mrpl17	0.359	0.359	0	0	0	0.359	0	0
CCR4-NOT transcription complex subunit 11 OS=Rattus norvegicus OX=10116 GN=Cnot11 PE=2 SV=1	CNO11_RAT	Cnot11	0	0	0	0	0.123	0	0	0
Cyclin-dependent kinase 4 OS=Rattus norvegicus OX=10116 GN=Cdk4 PE=1 SV=1	CDK4_RAT	Cdk4	0	0.323	0	0	0	0	0	0.323
Estradiol 17-beta-dehydrogenase 8 OS=Rattus norvegicus OX=10116 GN=Hsd17b8 PE=1 SV=1	DHB8_RAT	Hsd17b8	0.264	0	0	0	0.264	0.42	0	0.42
E3 SUMO-protein ligase NSE2 OS=Rattus norvegicus OX=10116 GN=Nsmce2 PE=2 SV=1	NSE2_RAT	Nsmce2	0.249	0	0	0	0	0	0	0
Syntenin-1 OS=Rattus norvegicus OX=10116 GN=Sdcbp PE=1 SV=1	SDCB1_RAT	Sdcbp	0.214	0	0.214	0	0	0	0	0
PDZK1-interacting protein 1 OS=Rattus norvegicus OX=10116 GN=Pdzk1ip1 PE=3 SV=1	PDZ1I_RAT	Pdzk1ip1	1.1	0.638	0.638	0	0.638	0.638	1.1	1.1
Dynein light chain 2, cytoplasmic OS=Rattus norvegicus OX=10116 GN=Dynll2 PE=1 SV=1	DYL2_RAT	Dynll2	0.779	0	0	0	0	0	0	0
Ras-related protein Rab-9A OS=Rattus norvegicus OX=10116 GN=Rab9a PE=1 SV=2	RAB9A_RAT	Rab9a	0.724	0	0	0	0	0	0	0
Serine racemase OS=Rattus norvegicus OX=10116 GN=Srr PE=1 SV=1	SRR_RAT	Srr	0.194	0	0	0	0	0	0.304	0
39S ribosomal protein L9, mitochondrial OS=Rattus norvegicus OX=10116 GN=Mrpl9 PE=2 SV=1	RM09_RAT	Mrpl9	0	0	0	0	0	0	0.232	0
WD repeat domain phosphoinositide-interacting protein 2 OS=Rattus norvegicus OX=10116 GN=Wipi2 PE=1 SV=1	WIPI2_RAT	Wipi2	0	0	0	0	0.14	0	0	0
Protein tyrosine phosphatase type IVA 1 OS=Rattus norvegicus OX=10116 GN=Ptp4a1 PE=1 SV=1	TP4A1_RAT	Ptp4a1	0.368	0	0	0	0	0.6	0.368	0
Astrocytic phosphoprotein PEA-15 OS=Rattus norvegicus OX=10116 GN=Pea15 PE=1 SV=1	PEA15_RAT	Pea15	0	0	0.503	0	0.503	0	0	0
Latexin OS=Rattus norvegicus OX=10116 GN=Lxn PE=1 SV=1	LXN_RAT	Lxn	0	0	0	0.277	0	0	0	0
Interferon regulatory factor 2-binding protein-like OS=Rattus norvegicus OX=10116 GN=Irf2bpl PE=1 SV=1	I2BPL_RAT	Irf2bpl	0	0.0817	0.125	0	0	0	0	0
General transcription factor IIF subunit 2 OS=Rattus norvegicus OX=10116 GN=Gtf2f2 PE=1 SV=1	T2FB_RAT	Gtf2f2	0.394	0	0	0	0	0	0	0
DNA polymerase delta subunit 2 OS=Rattus norvegicus OX=10116 GN=Pold2 PE=1 SV=1	DPOD2_RAT	Pold2	0	0	0	0.132	0	0.132	0	0
PDZ domain-containing protein GIPC2 OS=Rattus norvegicus OX=10116 GN=Gipc2 PE=2 SV=1	GIPC2_RAT	Gipc2	0.446	0.202	0	0	0	0	0	0
NEDD8-activating enzyme E1 regulatory subunit OS=Rattus norvegicus OX=10116 GN=Nae1 PE=1 SV=1	ULA1_RAT	Nae1	0	0	0	0	0.111	0	0	0
Origin recognition complex subunit 4 OS=Rattus norvegicus OX=10116 GN=Orc4 PE=2 SV=1	ORC4_RAT	Orc4	0	0	0	0	0	0	0.135	0
5'-AMP-activated protein kinase subunit beta-1 OS=Rattus norvegicus OX=10116 GN=Prkab1 PE=1 SV=4	AAKB1_RAT	Prkab1	0.512	0.229	0	0	0	0	0	0
Protein S100-A4 OS=Rattus norvegicus OX=10116 GN=S100a4 PE=2 SV=1	S10A4_RAT	S100a4	0.666	0	0	0	0	0	0	0
Ras-related protein Rab-43 OS=Rattus norvegicus OX=10116 GN=Rab43 PE=2 SV=1	RAB43_RAT	Rab43	0.711	0	0.711	0	0	0	0	0
Methylosome subunit pICln OS=Rattus norvegicus OX=10116 GN=Clns1a PE=1 SV=1	ICLN_RAT	Clns1a	0	0	0.271	0	0	0	0.433	0.433
Mothers against decapentaplegic homolog 4 OS=Rattus norvegicus OX=10116 GN=Smad4 PE=1 SV=1	SMAD4_RAT	Smad4	0	0.111	0	0.111	0	0	0	0
Protein FAM162A OS=Rattus norvegicus OX=10116 GN=Fam162a PE=2 SV=1	F162A_RAT	Fam162a	0	0	0	0	0	0	0.411	0
F-box only protein 6 OS=Rattus norvegicus OX=10116 GN=Fbxo6 PE=1 SV=1	FBX6_RAT	Fbxo6	0	0	0	0.212	0	0	0	0
MAGUK p55 subfamily member 2 OS=Rattus norvegicus OX=10116 GN=Mpp2 PE=1 SV=2	MPP2_RAT	Mpp2	0.109	0	0	0.109	0.109	0.109	0	0
Non-histone chromosomal protein HMG-17 OS=Rattus norvegicus OX=10116 GN=Hmgn2 PE=1 SV=2	HMGN2_RAT	Hmgn2	1.58	0	0	0.882	0	0	0	0
F-box only protein 7 OS=Rattus norvegicus OX=10116 GN=Fbxo7 PE=2 SV=1	FBX7_RAT	Fbxo7	0	0	0	0	0.181	0	0	0
Splicing regulatory glutamine/lysine-rich protein 1 OS=Rattus norvegicus OX=10116 GN=Srek1 PE=1 SV=1	SREK1_RAT	Srek1	0.119	0	0.119	0	0	0	0	0
AN1-type zinc finger protein 6 OS=Rattus norvegicus OX=10116 GN=Zfand6 PE=1 SV=1	ZFAN6_RAT	Zfand6	0	0	0	0.297	0.297	0	0	0
Signal peptidase complex catalytic subunit SEC11C OS=Rattus norvegicus OX=10116 GN=Sec11c PE=2 SV=3	SC11C_RAT	Sec11c	0	0	0	0	0	0	0.332	0
Beta-crystallin B3 OS=Rattus norvegicus OX=10116 GN=Crybb3 PE=1 SV=5	CRBB3_RAT	Crybb3	0	0	0	0.293	0	0	0	0.293
ERO1-like protein alpha OS=Rattus norvegicus OX=10116 GN=Ero1a PE=1 SV=1	ERO1A_RAT	Ero1a	0	0	0	0	0	0.125	0	0
RAC-alpha serine/threonine-protein kinase OS=Rattus norvegicus OX=10116 GN=Akt1 PE=1 SV=1	AKT1_RAT	Akt1	0	0	0.121	0	0	0	0	0
Protein jagged-2 (Fragment) OS=Rattus norvegicus OX=10116 GN=Jag2 PE=2 SV=1	JAG2_RAT	Jag2	0	0	0	0.0508	0.0508	0	0	0
Muscleblind-like protein 2 OS=Rattus norvegicus OX=10116 GN=Mbnl2 PE=1 SV=1	MBNL2_RAT	Mbnl2	0	0	0.171	0	0	0.171	0	0
NADH-cytochrome b5 reductase 1 OS=Rattus norvegicus OX=10116 GN=Cyb5r1 PE=2 SV=1	NB5R1_RAT	Cyb5r1	0.319	0	0	0.202	0	0	0	0
Dehydrogenase/reductase SDR family member 7B OS=Rattus norvegicus OX=10116 GN=Dhrs7b PE=1 SV=1	DRS7B_RAT	Dhrs7b	0	0.196	0	0.196	0	0	0	0
Neuronal-specific septin-3 OS=Rattus norvegicus OX=10116 GN=Sept3 PE=1 SV=2	SEPT3_RAT	2003-09-01	0	0	0	0.169	0	0	0	0
2,4-dienoyl-CoA reductase, mitochondrial OS=Rattus norvegicus OX=10116 GN=Decr1 PE=1 SV=2	DECR_RAT	Decr1	0	0	0	0	0	0	0.3	0
Cell division cycle-associated protein 7 OS=Rattus norvegicus OX=10116 GN=Cdca7 PE=1 SV=1	CDCA7_RAT	Cdca7	0	0.159	0	0	0	0	0	0
Tetratricopeptide repeat protein 9C OS=Rattus norvegicus OX=10116 GN=Ttc9c PE=2 SV=1	TTC9C_RAT	Ttc9c	0.588	0	0	0	0	0	0	0.361
Glutathione peroxidase 3 OS=Rattus norvegicus OX=10116 GN=Gpx3 PE=2 SV=2	GPX3_RAT	Gpx3	0	0	0.279	0	0.279	0	0	0.279
DNA-directed RNA polymerase II subunit RPB7 OS=Rattus norvegicus OX=10116 GN=Polr2g PE=2 SV=1	RPB7_RAT	Polr2g	0	0	0	0	0.377	0	0	0
Translocon-associated protein subunit gamma OS=Rattus norvegicus OX=10116 GN=Ssr3 PE=1 SV=2	SSRG_RAT	Ssr3	0.342	0	0	0	0	0	0	0
39S ribosomal protein L38, mitochondrial OS=Rattus norvegicus OX=10116 GN=Mrpl38 PE=2 SV=2	RM38_RAT	Mrpl38	0	0.152	0	0.152	0	0	0.152	0
GTP-binding protein Rheb OS=Rattus norvegicus OX=10116 GN=Rheb PE=1 SV=1	RHEB_RAT	Rheb	0	0.354	0	0.354	0	0	0	0
Contactin-1 OS=Rattus norvegicus OX=10116 GN=Cntn1 PE=1 SV=2	CNTN1_RAT	Cntn1	0	0	0	0	0	0	0.0582	0
Ubiquitin-conjugating enzyme E2 G1 OS=Rattus norvegicus OX=10116 GN=Ube2g1 PE=2 SV=3	UB2G1_RAT	Ube2g1	0.372	0	0	0	0	0	0	0.372
Membrane magnesium transporter 1 OS=Rattus norvegicus OX=10116 GN=Mmgt1 PE=2 SV=1	MMGT1_RAT	Mmgt1	0.516	0	0	0	0	0.516	0	0
N-acetyl-D-glucosamine kinase OS=Rattus norvegicus OX=10116 GN=Nagk PE=1 SV=4	NAGK_RAT	Nagk	0.185	0	0.185	0	0	0	0	0
DnaJ homolog subfamily C member 8 OS=Rattus norvegicus OX=10116 GN=Dnajc8 PE=2 SV=1	DNJC8_RAT	Dnajc8	0.372	0	0	0	0	0	0	0
WD repeat-containing protein 18 OS=Rattus norvegicus OX=10116 GN=Wdr18 PE=2 SV=1	WDR18_RAT	Wdr18	0	0.144	0	0	0	0.224	0	0
DnaJ homolog subfamily B member 6 OS=Rattus norvegicus OX=10116 GN=Dnajb6 PE=1 SV=1	DNJB6_RAT	Dnajb6	0.177	0.177	0	0	0	0	0	0
UDP-glucose 6-dehydrogenase OS=Rattus norvegicus OX=10116 GN=Ugdh PE=1 SV=1	UGDH_RAT	Ugdh	0	0	0	0	0	0	0.123	0.123
Phosphatidylinositol glycan anchor biosynthesis class U protein OS=Rattus norvegicus OX=10116 GN=Pigu PE=1 SV=3	PIGU_RAT	Pigu	0	0.136	0	0.136	0.136	0.136	0	0
C-terminal-binding protein 2 OS=Rattus norvegicus OX=10116 GN=Ctbp2 PE=1 SV=2	CTBP2_RAT	Ctbp2	0	0	0	0.215	0	0	0	0
Mitochondrial fission regulator 1-like OS=Rattus norvegicus OX=10116 GN=Mtfr1l PE=1 SV=1	MFR1L_RAT	Mtfr1l	0	0	0	0	0	0	0.219	0
Mitochondrial antiviral-signaling protein OS=Rattus norvegicus OX=10116 GN=Mavs PE=1 SV=1	MAVS_RAT	Mavs	0	0	0.126	0	0.194	0.126	0	0
Phosducin-like protein OS=Rattus norvegicus OX=10116 GN=Pdcl PE=1 SV=1	PHLP_RAT	Pdcl	0	0.202	0	0	0	0	0	0
MICOS complex subunit Mic25 OS=Rattus norvegicus OX=10116 GN=Chchd6 PE=1 SV=1	MIC25_RAT	Chchd6	0	0	0	0.24	0	0	0	0
MKI67 FHA domain-interacting nucleolar phosphoprotein OS=Rattus norvegicus OX=10116 GN=Nifk PE=2 SV=1	MK67I_RAT	Nifk	0	0.223	0	0	0	0	0	0
Spliceosome-associated protein CWC15 homolog OS=Rattus norvegicus OX=10116 GN=Cwc15 PE=1 SV=1	CWC15_RAT	Cwc15	0	0.265	0	0	0	0	0	0
Protein lin-7 homolog C OS=Rattus norvegicus OX=10116 GN=Lin7c PE=1 SV=1	LIN7C_RAT	Lin7c	0	0	0	0	0	0	0.531	0
Protein YIF1B OS=Rattus norvegicus OX=10116 GN=Yif1b PE=2 SV=2	YIF1B_RAT	Yif1b	0	0	0	0	0	0.247	0	0
Ubiquitin-like protein 3 OS=Rattus norvegicus OX=10116 GN=Ubl3 PE=3 SV=1	UBL3_RAT	Ubl3	0.582	0	0	0	0	0	0	0
Seipin OS=Rattus norvegicus OX=10116 GN=Bscl2 PE=1 SV=1	BSCL2_RAT	Bscl2	0	0	0	0	0	0	0	0.161
DNA repair protein SWI5 homolog OS=Rattus norvegicus OX=10116 GN=Swi5 PE=3 SV=1	SWI5_RAT	Swi5	1.37	0	0	0	0.779	0	0	0
2'-deoxynucleoside 5'-phosphate N-hydrolase 1 OS=Rattus norvegicus OX=10116 GN=Dnph1 PE=1 SV=1	DNPH1_RAT	Dnph1	0.414	0.414	0.414	0.414	0.414	0.414	0.682	0.414
ATP synthase protein 8 OS=Rattus norvegicus OX=10116 GN=Mt-atp8 PE=1 SV=2	ATP8_RAT	Mt-atp8	1.13	0	0	0	0	0	1.13	1.13
E3 ubiquitin-protein ligase RING2 OS=Rattus norvegicus OX=10116 GN=Rnf2 PE=2 SV=1	RING2_RAT	Rnf2	0	0	0	0	0	0	0.202	0
Ras-related protein Rab-4B OS=Rattus norvegicus OX=10116 GN=Rab4b PE=2 SV=1	RAB4B_RAT	Rab4b	0	0	0	0	0	0	0	0.694
Synaptopodin OS=Rattus norvegicus OX=10116 GN=Synpo PE=1 SV=2	SYNPO_RAT	Synpo	0	0	0	0	0	0.0663	0	0
Peroxiredoxin-6 OS=Rattus norvegicus OX=10116 GN=Prdx6 PE=1 SV=3	PRDX6_RAT	Prdx6	0.287	0	0	0	0	0	0	0.287
Integral membrane protein 2C OS=Rattus norvegicus OX=10116 GN=Itm2c PE=1 SV=1	ITM2C_RAT	Itm2c	0	0	0	0	0	0.229	0	0
Ragulator complex protein LAMTOR3 OS=Rattus norvegicus OX=10116 GN=Lamtor3 PE=2 SV=1	LTOR3_RAT	Lamtor3	0.565	0	0.565	0	0	0	0.565	0.565
Cathepsin L1 OS=Rattus norvegicus OX=10116 GN=Ctsl PE=1 SV=2	CATL1_RAT	Ctsl	0	0	0	0	0.183	0	0	0
Carboxymethylenebutenolidase homolog OS=Rattus norvegicus OX=10116 GN=Cmbl PE=2 SV=1	CMBL_RAT	Cmbl	0.401	0	0	0	0	0	0	0
UPF0729 protein C18orf32 homolog OS=Rattus norvegicus OX=10116 PE=3 SV=1	CR032_RAT		0	0	0	0	0	0	0	1.03
Mitochondrial import inner membrane translocase subunit Tim23 OS=Rattus norvegicus OX=10116 GN=Timm23 PE=2 SV=1	TIM23_RAT	Timm23	0.329	0	0	0	0	0	0	0
Succinate-semialdehyde dehydrogenase, mitochondrial OS=Rattus norvegicus OX=10116 GN=Aldh5a1 PE=1 SV=2	SSDH_RAT	Aldh5a1	0	0	0.12	0	0.12	0	0	0
Amyloid-beta A4 precursor protein-binding family A member 2 OS=Rattus norvegicus OX=10116 GN=Apba2 PE=1 SV=1	APBA2_RAT	Apba2	0	0	0	0	0	0	0	0.0804
Reticulocalbin-2 OS=Rattus norvegicus OX=10116 GN=Rcn2 PE=1 SV=2	RCN2_RAT	Rcn2	0	0.184	0	0	0	0	0	0
Small ubiquitin-related modifier 1 OS=Rattus norvegicus OX=10116 GN=Sumo1 PE=1 SV=1	SUMO1_RAT	Sumo1	0	0	0.682	0	0	0	0	0
Adenylate kinase 4, mitochondrial OS=Rattus norvegicus OX=10116 GN=Ak4 PE=2 SV=1	KAD4_RAT	Ak4	0	0	0	0	0	0	0.45	0
ATP-binding cassette sub-family B member 6, mitochondrial OS=Rattus norvegicus OX=10116 GN=Abcb6 PE=2 SV=1	ABCB6_RAT	Abcb6	0	0	0	0	0.0711	0	0	0
Phosphatidylglycerophosphatase and protein-tyrosine phosphatase 1 OS=Rattus norvegicus OX=10116 GN=Ptpmt1 PE=1 SV=1	PTPM1_RAT	Ptpmt1	0	0.329	0	0	0	0	0	0.329
Jupiter microtubule associated homolog 1 OS=Rattus norvegicus OX=10116 GN=JPT1 PE=1 SV=3	JUPI1_RAT	JPT1	0	0.482	0	0	0	0	0	0
Geranylgeranyl transferase type-2 subunit beta OS=Rattus norvegicus OX=10116 GN=Rabggtb PE=1 SV=1	PGTB2_RAT	Rabggtb	0.187	0	0	0	0	0	0	0
Transcription initiation factor IIA subunit 1 OS=Rattus norvegicus OX=10116 GN=Gtf2a1 PE=1 SV=1	TF2AA_RAT	Gtf2a1	0.165	0	0	0	0	0	0	0
Phosphatidylinositol 4,5-bisphosphate 5-phosphatase A OS=Rattus norvegicus OX=10116 GN=Inpp5j PE=1 SV=1	PI5PA_RAT	Inpp5j	0	0	0	0.0617	0	0	0	0
Gamma-butyrobetaine dioxygenase OS=Rattus norvegicus OX=10116 GN=Bbox1 PE=1 SV=1	BODG_RAT	Bbox1	0.153	0	0	0	0	0	0	0
ATP-dependent (S)-NAD(P)H-hydrate dehydratase OS=Rattus norvegicus OX=10116 GN=Naxd PE=3 SV=1	NNRD_RAT	Naxd	0	0	0	0	0	0	0.189	0
Cytochrome c oxidase subunit 1 OS=Rattus norvegicus OX=10116 GN=Mtco1 PE=2 SV=3	COX1_RAT	Mtco1	0	0	0	0	0	0.119	0	0
Protein jagunal homolog 1 OS=Rattus norvegicus OX=10116 GN=Jagn1 PE=2 SV=1	JAGN1_RAT	Jagn1	0.342	0	0	0	0	0	0	0
Multiple coagulation factor deficiency protein 2 homolog OS=Rattus norvegicus OX=10116 GN=Mcfd2 PE=1 SV=1	MCFD2_RAT	Mcfd2	0	0	0	0	0.463	0	0	0
Alpha-tubulin N-acetyltransferase 1 OS=Rattus norvegicus OX=10116 GN=Atat1 PE=1 SV=1	ATAT_RAT	Atat1	0.144	0	0	0	0	0	0	0
Mannose-1-phosphate guanyltransferase alpha OS=Rattus norvegicus OX=10116 GN=Gmppa PE=2 SV=1	GMPPA_RAT	Gmppa	0	0	0	0	0	0	0.147	0
Uncharacterized protein C7orf50 homolog OS=Rattus norvegicus OX=10116 PE=1 SV=1	CG050_RAT		0	0.325	0	0	0	0	0	0.325
Acyl-coenzyme A thioesterase 8 OS=Rattus norvegicus OX=10116 GN=Acot8 PE=1 SV=1	ACOT8_RAT	Acot8	0	0	0	0	0	0	0.192	0
Ena/VASP-like protein OS=Rattus norvegicus OX=10116 GN=Evl PE=1 SV=2	EVL_RAT	Evl	0	0	0	0	0	0.151	0	0
Protein TSSC4 OS=Rattus norvegicus OX=10116 GN=Tssc4 PE=2 SV=1	TSSC4_RAT	Tssc4	0	0.204	0.204	0	0	0	0.204	0
Testicular haploid expressed gene protein-like OS=Rattus norvegicus OX=10116 GN=Thegl PE=2 SV=1	THEGL_RAT	Thegl	0	0.132	0	0	0	0	0	0
E3 SUMO-protein ligase PIAS2 OS=Rattus norvegicus OX=10116 GN=Pias2 PE=1 SV=1	PIAS2_RAT	Pias2	0	0.106	0	0	0	0	0	0
Serine/threonine-protein phosphatase CPPED1 OS=Rattus norvegicus OX=10116 GN=Cpped1 PE=1 SV=1	CPPED_RAT	Cpped1	0	0	0	0	0	0	0.196	0
Inositol monophosphatase 2 OS=Rattus norvegicus OX=10116 GN=Impa2 PE=2 SV=1	IMPA2_RAT	Impa2	0.219	0	0	0	0	0	0	0
Mitochondrial import inner membrane translocase subunit Tim17-A OS=Rattus norvegicus OX=10116 GN=Timm17a PE=2 SV=1	TI17A_RAT	Timm17a	0	0	0	0	0	0	0.409	0
Chromaffin granule amine transporter OS=Rattus norvegicus OX=10116 GN=Slc18a1 PE=2 SV=1	VMAT1_RAT	Slc18a1	0	0	0	0	0	0	0.121	0
Protein THEM6 OS=Rattus norvegicus OX=10116 GN=Them6 PE=2 SV=1	THEM6_RAT	Them6	0.482	0	0	0	0	0	0	0
Phospholipid scramblase 3 OS=Rattus norvegicus OX=10116 GN=Plscr3 PE=2 SV=1	PLS3_RAT	Plscr3	0.22	0	0	0	0	0	0	0
Transmembrane protein 163 OS=Rattus norvegicus OX=10116 GN=Tmem163 PE=1 SV=1	TM163_RAT	Tmem163	0	0	0	0	0	0	0	0.223
Uncharacterized protein C6orf136 homolog OS=Rattus norvegicus OX=10116 PE=2 SV=1	CF136_RAT		0.354	0	0	0	0	0	0	0
Kelch domain-containing protein 10 OS=Rattus norvegicus OX=10116 GN=Klhdc10 PE=2 SV=1	KLD10_RAT	Klhdc10	0.15	0	0	0	0	0	0	0
Transmembrane and ubiquitin-like domain-containing protein 1 OS=Rattus norvegicus OX=10116 GN=Tmub1 PE=1 SV=1	TMUB1_RAT	Tmub1	0	0	0	0	0	0.268	0	0
